# Supplementary material
Source: Royal Society of Chemistry journal article supplement (doi:10.1039/d6md00025h)
Supplement: d6md00025h1.pdf [file d6md00025h1.pdf]

## Supporting Information

### Design, synthesis and pharmacological evaluation of 3*H*-spiro[benzofuran-2,4'-piperidine] IRAK4 inhibitors for the treatment of diffuse large B-cell lymphoma

Zhiwei Chen,<sup>‡ad</sup> Qi Zhang,<sup>‡bd</sup> Yun Chen,<sup>ad</sup> Yi Ning,<sup>bd</sup> Q-i Zhang,<sup>bcd</sup> Mengxiao Zhang,<sup>ad</sup> Qiupei Liu,<sup>be</sup> Yi Xue,<sup>ad</sup> Linjiang Tong,<sup>bd</sup> Jian Ding,<sup>bd</sup> Hua Xie<sup>\*bcd</sup> and Wenhui Duan<sup>\*ad</sup>

<sup>a</sup> *Small-Molecule Drug Research Center, Shanghai Institute of Materia Medica, Chinese Academy of Sciences, 555 Zu Chong Zhi Road, Shanghai, 201203, China. E-mail: whduan@simm.ac.cn*

<sup>b</sup> *Division of Antitumor Pharmacology, Shanghai Institute of Materia Medica, Chinese Academy of Sciences, 555 Zu Chong Zhi Road, Shanghai, 201203, China. E-mail: hxie@simm.ac.cn*

<sup>c</sup> *Zhongshan Institute for Drug Discovery, Shanghai Institute of Materia Medica, Chinese Academy of Sciences, Zhongshan, 528400, China*

<sup>d</sup> *University of Chinese Academy of Sciences, No. 19A Yuquan Road, Beijing, 100049, China*

<sup>e</sup> *Department of Chemical and Environmental Engineering, Science and Engineering Building, The University of Nottingham Ningbo China, Ningbo, 315100, China*

\* Corresponding author.

‡ These authors contributed equally to this work.

#### Table of Contents

|                                                                                                                                                                 |    |
|-----------------------------------------------------------------------------------------------------------------------------------------------------------------|----|
| Synthesis of intermediates <b>A1–A9</b> , <b>B1</b> , <b>C1</b> , <b>E5</b> , <b>F3</b> , <b>F4</b> , <b>G1</b> , <b>G2</b> , <b>H4</b> , and <b>I1</b> . ..... | 2  |
| <sup>1</sup> H NMR spectra for intermediates. ....                                                                                                              | 12 |
| <sup>1</sup> H NMR, <sup>13</sup> C NMR, and HRMS spectra for target compounds <b>1–21</b> and DW18134. ....                                                    | 25 |
| HPLC determination of target compounds <b>1–21</b> and DW18134. ....                                                                                            | 47 |
| The binding models of compounds <b>3–7</b> with IRAK4. ....                                                                                                     | 70 |
| References. ....                                                                                                                                                | 70 |

## Synthesis of intermediates **A1–A9**, **B1**, **C1**, **E5**, **F3**, **F4**, **G1**, **G2**, **H4**, and **I1**.

### General procedure for the preparation of **A1–A6**.

#### Synthesis of intermediate **A1**

Step A: a mixture of ethyl 2-chlorooxazole-4-carboxylate (**A10**) (100 mg, 0.57 mmol), 4-(4,4,5,5-tetramethyl-1,3,2-dioxaborolan-2-yl)-1-((2-(trimethylsilyl)ethoxy)methyl)-1*H*-pyrazole (221 mg, 0.68 mmol), Pd(dppf)<sub>2</sub>Cl<sub>2</sub> (83 mg, 0.11 mmol), and sodium carbonate (181 mg, 1.71 mmol) in 1,2-dimethoxyethane/water (4.0 mL/0.4 mL) was heated to 80 °C under an argon atmosphere for 6 hours. The mixture was cooled to room temperature and concentrated. The residue was purified by silica gel chromatography eluting with 25% petroleum ether in ethyl acetate to afford **A11** as a white solid (181 mg, 94%). <sup>1</sup>H NMR (400 MHz, chloroform-*d*) δ 8.19 – 8.18 (m, 2H), 8.08 (s, 1H), 5.47 (s, 2H), 4.42 (q, *J* = 7.1 Hz, 2H), 3.59 (t, *J* = 8.0 Hz, 2H), 1.40 (t, *J* = 7.1 Hz, 3H), 0.92 (t, *J* = 8.0 Hz, 2H), -0.02 (s, 9H). ESI-LRMS *m/z* [M+H]<sup>+</sup> calcd for C<sub>15</sub>H<sub>24</sub>N<sub>3</sub>O<sub>4</sub>Si: 338.2, found: 338.1.

Step B: a mixture of **A11** (160 mg, 0.47 mmol) and sodium hydroxide (56 mg, 1.40 mmol) in tetrahydrofuran/methanol/water (1 mL/4 mL/2 mL) was stirred at room temperature for 30 minutes. The solvent was removed in vacuo. The residue was adjusted pH to 4 with 1 M hydrochloric acid upon which precipitate formed. The precipitate was filtered off and dried to afford **A1** as a white solid (107 mg, 73%). <sup>1</sup>H NMR (400 MHz, DMSO-*d*<sub>6</sub>) δ 13.09 (brs, 1H), 8.72 (s, 1H), 8.62 (s, 1H), 8.07 (s, 1H), 5.48 (s, 2H), 3.58 (t, *J* = 8.0 Hz, 2H), 0.85 (t, *J* = 8.0 Hz, 2H), -0.05 (s, 9H). ESI-LRMS *m/z* [M+H]<sup>+</sup> calcd for C<sub>13</sub>H<sub>20</sub>N<sub>3</sub>O<sub>4</sub>Si: 310.1, found: 310.3.

#### Synthesis of intermediate **A2**

Intermediate **A2** was prepared from ethyl 2-chlorooxazole-4-carboxylate (**A10**) and 2-(difluoromethoxy)-4-(4,4,5,5-tetramethyl-1,3,2-dioxaborolan-2-yl)pyridine according to the general procedure for the preparation of **A1**. <sup>1</sup>H NMR (400 MHz, DMSO-*d*<sub>6</sub>) δ 13.37 (brs, 1H), 9.02 (s, 1H), 8.48 (d, *J* = 5.0 Hz, 1H), 7.82 (d, *J* = 5.0 Hz, 1H), 7.78 (t, *J* = 72.0 Hz, 1H), 7.55 (s, 1H). ESI-LRMS *m/z* [M+H]<sup>+</sup> calcd for C<sub>10</sub>H<sub>7</sub>F<sub>2</sub>N<sub>2</sub>O<sub>4</sub>: 257.0, found: 257.0.

### Synthesis of intermediate **A3**

Intermediate **A3** was prepared from ethyl 2-chlorooxazole-4-carboxylate (**A10**) and (3-sulfamoylphenyl)boronic acid according to the general procedure for the preparation of **A1**. <sup>1</sup>H NMR (400 MHz, DMSO-*d*<sub>6</sub>) δ 8.63 (s, 1H), 8.51 (s, 1H), 8.18 (d, *J* = 7.9 Hz, 1H), 7.96 (d, *J* = 7.9 Hz, 1H), 7.76 (t, *J* = 7.9 Hz, 1H), 7.61 (s, 2H).

### Synthesis of intermediate **A4**

Intermediate **A4** was prepared from ethyl 2-chlorooxazole-4-carboxylate (**A10**) and *tert*-butyl (4-(4,4,5,5-tetramethyl-1,3,2-dioxaborolan-2-yl)pyridin-2-yl)(2,2,2-trifluoroethyl)carbamate according to the general procedure for the preparation of **A1**. <sup>1</sup>H NMR (400 MHz, chloroform-*d*) δ 8.51 (d, *J* = 5.1 Hz, 1H), 8.43 (s, 1H), 8.37 (s, 1H), 7.78 (d, *J* = 5.1 Hz, 1H), 4.88–4.79 (m, 2H), 1.55 (s, 9H).

### Synthesis of intermediate **A5**

Intermediate **A5** was prepared from ethyl 2-chlorooxazole-4-carboxylate (**A10**) and (6-(benzyloxy)pyridin-3-yl)boronic acid according to the general procedure for the preparation of **A1**. <sup>1</sup>H NMR (400 MHz, DMSO-*d*<sub>6</sub>) δ 13.27 (brs, 1H), 8.84 (s, 1H), 8.81 (s, 1H), 8.27 (d, *J* = 8.7 Hz, 1H), 7.48 (d, *J* = 7.5 Hz, 2H), 7.43 – 7.30 (m, 3H), 7.07 (d, *J* = 8.7 Hz, 1H), 5.44 (s, 2H). ESI-LRMS *m/z* [M+H]<sup>+</sup> calcd for C<sub>16</sub>H<sub>13</sub>N<sub>2</sub>O<sub>4</sub>: 297.1, found: 297.0.

### Synthesis of intermediate **A6**

Intermediate **A6** was prepared from ethyl 2-chlorooxazole-4-carboxylate (**A10**) and *tert*-butyl (4-(4,4,5,5-tetramethyl-1,3,2-dioxaborolan-2-yl)pyridin-2-yl)carbamate according to the general procedure for the preparation of **A1**. <sup>1</sup>H NMR (400 MHz, DMSO-*d*<sub>6</sub>) δ 13.39 (s, 1H), 10.16 (s, 1H), 8.96 (s, 1H), 8.56–8.26 (m, 2H), 7.55 (d, *J* = 5.1 Hz, 1H), 1.50 (s, 9H).

### Synthesis of intermediate **A7**

Step A: a mixture of ethyl oxazole-4-carboxylate (**A17**) (230 mg, 1.63 mmol),

4-bromo-2-(difluoromethyl)pyridine (407 mg, 1.95 mmol), Pd(OAc)<sub>2</sub> (37 mg, 0.16 mmol), tri-*o*-tolylphosphine (98 mg, 0.32 mmol), and cesium carbonate (98 mg, 0.32 mmol) in DMF (8.0 mL) was heated to 70 °C under an argon atmosphere for 4 hours. The mixture was cooled to room temperature and concentrated. The residue was purified by silica gel chromatography eluting with 14% petroleum ether in ethyl acetate to afford **A19** as a white solid (305 mg, 70%). <sup>1</sup>H NMR (400 MHz, chloroform-*d*) δ 8.81 (d, *J* = 4.4 Hz, 1H), 8.37 (s, 1H), 8.32 (s, 1H), 8.08 (d, *J* = 4.4 Hz, 1H), 6.70 (t, *J* = 55.2 Hz, 1H), 4.45 (q, *J* = 7.1 Hz, 2H), 1.42 (t, *J* = 7.1 Hz, 3H). ESI-LRMS *m/z* [M+H]<sup>+</sup> calcd for C<sub>12</sub>H<sub>11</sub>F<sub>2</sub>N<sub>2</sub>O<sub>3</sub>: 269.1, found: 269.0.

Step B: intermediate **A7** was prepared from **A19** according to the procedure for the preparation of **A1** (76%). <sup>1</sup>H NMR (400 MHz, DMSO-*d*<sub>6</sub>) δ 13.40 (brs, 1H), 9.03 (s, 1H), 8.91 (d, *J* = 5.1 Hz, 1H), 8.16 (s, 1H), 8.11 (d, *J* = 5.1 Hz, 1H), 7.10 (t, *J* = 54.6 Hz, 1H). ESI-LRMS *m/z* [M+H]<sup>+</sup> calcd for C<sub>10</sub>H<sub>7</sub>F<sub>2</sub>N<sub>2</sub>O<sub>3</sub>: 241.0, found: 241.1.

#### Synthesis of intermediate **A8**

Step A: a mixture of *tert*-butyl 4-bromo-1*H*-pyrrolo[2,3-*b*]pyridine-1-carboxylate (211 mg, 0.71 mmol), ethyl oxazole-4-carboxylate (**A17**) (200 mg, 1.42 mmol), Pd(OAc)<sub>2</sub> (16 mg, 0.07 mmol), tri-*o*-tolylphosphine (43 mg, 0.14 mmol), and cesium carbonate (462 mg, 1.42 mmol) in diethyl carbonate (6.0 mL) was heated to 110 °C under an argon atmosphere for 20 hours. The mixture was cooled to room temperature and concentrated. The residue was purified by silica gel chromatography eluting with 15% ethyl acetate in petroleum ether to afford crude **A21** as a yellow solid (65 mg). ESI-LRMS *m/z* [M+H]<sup>+</sup> calcd for C<sub>18</sub>H<sub>20</sub>N<sub>3</sub>O<sub>5</sub>: 358.1, found: 358.2.

Step B: a mixture of **A21** (60 mg, 0.168 mmol), lithium hydroxide monohydrate (22 mg, 0.524 mmol) in tetrahydrofuran/methanol/water (3.0 mL/1.5 mL/0.7 mL) was stirred at room temperature for 1 hour. The solvent was removed in vacuo. The residue was added water (5 mL) and cooled in an ice bath. Then the mixture was adjusted pH to 5 with 1 M hydrochloric acid upon which precipitate formed. The precipitate was filtered off and dried to afford crude **A8** as a yellow solid (20 mg). <sup>1</sup>H

NMR (400 MHz, methanol-*d*<sub>4</sub>)  $\delta$  8.41 (s, 1H), 8.30 (d, *J* = 5.1 Hz, 1H), 7.78 (d, *J* = 5.0 Hz, 1H), 7.54 (d, *J* = 3.4 Hz, 1H), 7.29 (d, *J* = 3.0 Hz, 1H).

### Synthesis of intermediate **A9**

Step A: a mixture of ethyl oxazole-4-carboxylate (**A17**) (4.1 g, 29.1 mmol), 4-bromopyridin-2-amine (2.5 g, 14.4 mmol), Pd(OAc)<sub>2</sub> (338 mg, 1.5 mmol), [1,1'-biphenyl]-2-ylidicyclohexylphosphane (1.0 g, 2.9 mmol), and cesium carbonate (9.4 g, 28.9 mmol) in diethyl carbonate (51 mL) was heated to 110 °C under an argon atmosphere for 20 hours. The mixture was cooled to room temperature and concentrated. The residue was purified by silica gel chromatography eluting with 20% petroleum ether in ethyl acetate to afford **A23** as a yellow solid (452 mg, 13%). <sup>1</sup>H NMR (400 MHz, DMSO-*d*<sub>6</sub>)  $\delta$  8.99 (s, 1H), 8.08 (d, *J* = 5.3 Hz, 1H), 7.05 (s, 1H), 6.99 (d, *J* = 5.3 Hz, 1H), 6.32 (s, 2H), 4.32 (q, *J* = 7.1 Hz, 2H), 1.31 (t, *J* = 7.1 Hz, 3H). ESI-LRMS *m/z* [M+H]<sup>+</sup> calcd for C<sub>11</sub>H<sub>12</sub>N<sub>3</sub>O<sub>3</sub>: 234.1, found: 234.1.

Step B: a mixture of **A23** (919 mg, 3.9 mmol) and lithium hydroxide monohydrate (500 mg, 11.9 mmol) in tetrahydrofuran/methanol/water (14.0 mL/7.0 mL/3.5 mL) was stirred at room temperature for 1 hour. The solvent was removed in vacuo. The residue was added water (10 mL) and adjusted pH to 5 with 1 M hydrochloric acid upon which precipitate formed. The precipitate was filtered off and dried to afford **A9** as a yellow solid (769 mg, 95%). <sup>1</sup>H NMR (400 MHz, DMSO-*d*<sub>6</sub>)  $\delta$  13.25 (s, 1H), 8.88 (s, 1H), 8.07 (d, *J* = 5.2 Hz, 1H), 7.03 (s, 1H), 6.99 (d, *J* = 5.2 Hz, 1H), 6.32 (s, 2H). ESI-LRMS *m/z* [M+H]<sup>+</sup> calcd for C<sub>9</sub>H<sub>8</sub>N<sub>3</sub>O<sub>3</sub>: 206.1, found: 206.0.

### Synthesis of intermediate **B1**

Step A: intermediate **B3–B6** was synthesized according to our previously reported procedure.<sup>1</sup>

Step B: a mixture of **B6** (3.7 g, 16.3 mmol), pyridin-4-ylboronic acid (4.0 g, 32.6 mmol), cesium carbonate (10.6 g, 32.6 mmol), and Pd(dppf)<sub>2</sub>Cl<sub>2</sub> (1.2 g, 1.6 mmol) in 1,4-dioxane/water (90 mL/9 mL) was heated to 100 °C under an argon atmosphere for 16 hours. The mixture was cooled to room temperature and concentrated. The residue

was purified by silica gel chromatography eluting with 33% ethyl acetate in petroleum ether to afford **B7** as a yellow solid (4.1 g, 94%). <sup>1</sup>H NMR (400 MHz, chloroform-*d*) δ 8.63 (dd, *J* = 4.5, 1.8 Hz, 2H), 7.92 (s, 1H), 7.19 (dd, *J* = 4.5, 1.8 Hz, 2H), 6.60 (s, 1H), 3.12 (s, 2H), 1.54 (s, 6H).

Step C: **B7** (6.5 g, 24.1 mmol) was dissolved in ethanol (163 mL) followed by the addition of iron powder (33.0 g, 590.9 mmol), ammonium chloride (31.1 g, 581.3 mmol), and water (54 mL). The mixture was heated to 50 °C under an argon atmosphere for 3 hours and then filtered through Celite. The filtrate was concentrated and the residue was purified by chromatography on silica gel eluting with 70% ethyl acetate in petroleum ether to afford **B1** as a yellow solid (4.7 g, 82%). <sup>1</sup>H NMR (400 MHz, chloroform-*d*) δ 8.64 (d, *J* = 6.0 Hz, 2H), 7.40 (d, *J* = 6.0 Hz, 2H), 6.64 (s, 1H), 6.53 (s, 1H), 2.98 (s, 2H), 1.47 (s, 6H). ESI-LRMS *m/z* [M+H]<sup>+</sup> calcd for C<sub>15</sub>H<sub>17</sub>N<sub>2</sub>O: 241.1, found: 241.1.

#### Synthesis of intermediate **C1**

Step A: to a solution of magnesium (6.9 g, 284.0 mmol) and iodine (650 mg, 2.5 mmol) in diethyl ether (150 mL) at reflux was slowly added 1-(bromomethyl)-4-chloro-2-fluorobenzene (**C2**) (25.0 g, 112 mmol), and the resulting mixture was stirred for 30 minutes. This solution was then added to *tert*-butyl 4-oxopiperidine-1-carboxylate (18.8 g, 94 mmol) in diethyl ether (400 mL) at -78 °C prior to warming to room temperature for 2 hours. A saturated aqueous solution of ammonium chloride (800 mL) and ethyl acetate (800 mL) were added, and the organic phase was separated. The organic phase was concentrated and the residue was purified by silica gel chromatography with 15% ethyl acetate in petroleum ether to afford crude **C3** (22.3 g) as a white solid. ESI-LRMS *m/z* [M+Na]<sup>+</sup> calcd for C<sub>17</sub>H<sub>24</sub>ClFNNaO<sub>3</sub>: 366.1, found: 366.1.

Step B: a mixture of crude **C3** (22.3 g) and potassium *tert*-butanolate (18.3 g, 163 mmol) in THF (131 mL) was stirred at 65 °C for 3 hours. A saturated aqueous solution of ammonium chloride (500 mL) was added, and the mixture was extracted with ethyl acetate (500 mL X 3). The organic phase was isolated and concentrated.

The residue was purified by silica gel chromatography with 10% ethyl acetate in petroleum ether to afford **C4** (15.4 g, 50% yield for two steps) as a white solid. <sup>1</sup>H NMR (400 MHz, chloroform-*d*) δ 7.03 (d, *J* = 7.9 Hz, 1H), 6.80 (d, *J* = 7.9 Hz, 1H), 6.75 (s, 1H), 3.88 – 3.64 (m, 2H), 3.52 – 3.31 (m, 2H), 2.94 (s, 2H), 1.95 – 1.84 (m, 2H), 1.73 – 1.64 (m, 2H), 1.47 (s, 9H).

Step C: a mixture of **C4** (2.55 g, 7.9 mmol) in dichloromethane (40 mL) and trifluoroacetic acid (8 mL) was stirred at room temperature for 1.5 hours. The solvent was concentrated under reduced pressure, and the resulting residue was slurried with diethyl ether (30 mL) for 10 minutes. The solid was collected by filtration and dried in vacuo to afford **C5** as a white solid (2.20 g, 83%). <sup>1</sup>H NMR (400 MHz, DMSO-*d*<sub>6</sub>) δ 8.70 (s, 2H), 7.18 (d, *J* = 7.8 Hz, 1H), 6.88 – 6.83 (m, 2H), 3.23 – 3.08 (m, 4H), 3.05 (s, 2H), 2.02 – 1.84 (m, 4H).

Step D: a mixture of **C5** (50 mg, 0.15 mmol), trifluoroacetic anhydride (90 μL, 0.65 mmol), and DIPEA (110 μL, 0.64 mmol) in dichloromethane (2 mL) was stirred at room temperature for 3 hours. Then the mixture was diluted with dichloromethane, washed with water and brine. The organic phase was dried over anhydrous sodium sulfate, filtered, and concentrated to afford **C6** as a yellow solid (42 mg, 87%). <sup>1</sup>H NMR (400 MHz, chloroform-*d*) δ 7.06 (d, *J* = 7.9 Hz, 1H), 6.84 (dd, *J* = 7.9, 1.9 Hz, 1H), 6.78 (d, *J* = 1.9 Hz, 1H), 4.39 – 4.30 (m, 1H), 3.92 – 3.83 (m, 1H), 3.70 – 3.59 (m, 1H), 3.41 – 3.31 (m, 1H), 2.98 (s, 2H), 2.09 – 2.00 (m, 2H), 1.83 – 1.72 (m, 2H).

Step E: To a solution of **C6** (100 mg, 0.31 mmol) in dichloromethane (4.0 mL) was slowly added fuming nitric acid (1.9 mL). The mixture was stirred at room temperature for 10 hours. Then water (10 mL) was added and the mixture was extracted with dichloromethane (10 mL X 3). The organic phase was washed with brine and concentrated. The residue was purified by silica gel chromatography with 25% ethyl acetate in petroleum ether to afford **C7** (68 mg, 60%) as a yellow oil. <sup>1</sup>H NMR (400 MHz, chloroform-*d*) δ 7.86 (s, 1H), 6.92 (s, 1H), 4.43 – 4.35 (m, 1H), 3.96 – 3.87 (m, 1H), 3.69 – 3.58 (m, 1H), 3.40 – 3.30 (m, 1H), 3.08 (s, 2H), 2.13 – 2.04 (m, 2H), 1.89 – 1.78 (m, 2H).

Step F: a mixture of **C7** (34 mg, 0.09 mmol) and potassium carbonate (48 mg,

0.35 mmol) in methanol/water (2 mL/0.7 mL) was stirred at room temperature for 40 minutes. Then the mixture was diluted with dichloromethane, washed with water and brine. The organic phase was dried over anhydrous sodium sulfate, filtered, and concentrated to afford **C8** as a yellow oil (24 mg, 99%). ESI-LRMS  $m/z$   $[M+H]^+$  calcd for  $C_{12}H_{14}ClN_2O_3$ : 269.1, found: 269.1.

Step G: a mixture of **C8** (716 mg, 2.66 mmol) and di-*tert*-butyl dicarbonate (700 mg, 3.20 mmol) in 1,4-dioxane (8 mL) was stirred at room temperature for 2 hours. The solvent was concentrated under reduced pressure, and the resulting residue was purified by silica gel chromatography eluting with 25% ethyl acetate in petroleum ether to afford **C9** as a yellow solid (563 mg, 57%).  $^1H$  NMR (400 MHz, chloroform-*d*)  $\delta$  7.83 (s, 1H), 6.87 (s, 1H), 3.84 – 3.71 (m, 2H), 3.41 – 3.30 (m, 2H), 3.03 (s, 2H), 1.95 – 1.88 (m, 2H), 1.78 – 1.70 (m, 2H), 1.46 (s, 9H).

Step H: a mixture of **C9** (405 mg, 1.10 mmol), pyridin-4-ylboronic acid (540 mg, 4.39 mmol), cesium carbonate (716 mg, 2.20 mmol), and  $Pd(dppf)_2Cl_2$  (80 mg, 0.11 mmol) in 1,4-dioxane/water (20 mL/2 mL) was heated to 100 °C under an argon atmosphere overnight. The mixture was cooled to room temperature and filtered through Celite. The filtrate was diluted with ethyl acetate, washed with water and brine. The organic phase was dried over anhydrous sodium sulfate, filtered, and concentrated. The residue was purified by silica gel chromatography eluting with 30% ethyl acetate in petroleum ether to afford **C1** as a yellow solid (291 mg, 76%).  $^1H$  NMR (400 MHz, chloroform-*d*)  $\delta$  8.65 (d,  $J = 5.8$  Hz, 2H), 7.94 (s, 1H), 7.19 (d,  $J = 5.8$  Hz, 2H), 6.67 (s, 1H), 3.88 – 3.74 (m, 2H), 3.43 – 3.34 (m, 2H), 3.11 (s, 2H), 2.00 – 1.92 (m, 2H), 1.83 – 1.72 (m, 2H), 1.48 (s, 9H).

### Synthesis of intermediate **E5**

Step A: a mixture of **E1** (224 mg, 0.97 mmol) and diethylaminosulfur trifluoride (321  $\mu$ L, 2.43 mmol) in dichloromethane (10 mL) was stirred at room temperature overnight. The reaction mixture was diluted with dichloromethane, washed with water and brine. The organic phase was dried over anhydrous sodium sulfate, filtered, and concentrated. The residue was purified by chromatography on

silica gel eluting with petroleum ether to afford **E2** as a colorless oil (180 mg, 73%). <sup>1</sup>H NMR (400 MHz, chloroform-*d*) δ 7.61 (t, *J* = 8.1 Hz, 1H), 7.30 – 7.26 (m, 1H), 7.23 – 7.19 (m, 1H), 4.38 (q, *J* = 7.1 Hz, 2H), 1.35 (t, *J* = 7.1 Hz, 3H).

Step B: to a stirred solution of **E2** (180 mg, 0.71 mmol) in dry THF (5 mL) was added methyl magnesium bromide (3M in ethyl ether, 0.72 mL) dropwise at –75 °C and the mixture was stirred for additional 10 minutes. Then the mixture was warmed and stirred at room temperature for 2 hours. The reaction was quenched with saturated ammonium chloride solution, extracted with ethyl acetate and washed with brine. The organic phase was dried over anhydrous sodium sulfate, filtered, and concentrated to afford **E3** as a colorless oil (163 mg, 96%). <sup>1</sup>H NMR (400 MHz, chloroform-*d*) δ 7.39 (t, *J* = 8.1 Hz, 1H), 7.23–7.13 (m, 2H), 2.01 (s, 1H), 1.33 (q, *J* = 1.3 Hz, 6H).

Step C: a mixture of **E3** (162 mg, 0.70 mmol) and potassium *tert*-butoxide (191 mg, 1.70 mmol) in dry THF (8 mL) was heated to reflux for 2.5 hours. The mixture was concentrated, diluted with ethyl acetate, and washed with brine. The organic phase was dried over anhydrous sodium sulfate, filtered, and concentrated to afford **E4** as a yellow oil (128 mg, 84%). <sup>1</sup>H NMR (400 MHz, chloroform-*d*) δ 7.39 (dt, *J* = 8.1, 1.6 Hz, 1H), 6.99 (dd, *J* = 8.1, 1.7 Hz, 1H), 6.86 (q, *J* = 1.7 Hz, 1H), 1.49 (t, *J* = 2.0 Hz, 6H).

Step D: to a stirred solution of **E4** (64 mg, 0.29 mmol) in dichloromethane (3 mL) was slowly added fuming nitric acid (0.2 mL) at room temperature and stirred for 30 minutes. Then the mixture was diluted with dichloromethane, washed with saturated sodium bicarbonate solution and brine. The organic phase was dried over anhydrous sodium sulfate, filtered, and concentrated. The residue was purified by prep-TLC (5% ethyl acetate in petroleum ether) to afford **E5** as a yellow oil (18 mg, 23%). <sup>1</sup>H NMR (400 MHz, chloroform-*d*) δ 8.17 (t, *J* = 1.5 Hz, 1H), 7.03 (t, *J* = 1.5 Hz, 1H), 1.54 (t, *J* = 2.1 Hz, 6H).

#### Synthesis of intermediate **F3** and **F4**

Step A: a mixture of **C1** (282 mg, 0.685 mmol) in dichloromethane (3 mL) and trifluoroacetic acid (1 mL) was stirred at room temperature for 1 hour. The solvents

were removed under reduced pressure to yield a residue, which was dissolved in methanol (1 mL). The solution was neutralized with ammonium hydroxide, and the resulting mixture was diluted with water and extracted with ethyl acetate. The combined organic extracts were concentrated to afford **F3** as a yellow solid (149 mg, 70%). <sup>1</sup>H NMR (400 MHz, chloroform-*d*) δ 8.65 (d, *J* = 5.0 Hz, 2H), 7.94 (s, 1H), 7.19 (d, *J* = 5.0 Hz, 2H), 6.67 (s, 1H), 3.25 – 3.00 (m, 6H), 2.08 – 1.93 (m, 4H).

Step B: To a solution of **F3** (47 mg, 0.15 mmol) in methanol (3 mL) was added formaldehyde (37 wt % in water, 116 μL) at room temperature. The reaction solution was stirred for 1 h at room temperature. Sodium borohydride (115 mg, 3.02 mmol) was added slowly, and the reaction was stirred for 1 hour at room temperature. Saturated ammonium chloride solution (60 μL) was added, and the mixture was concentrated. The residue was purified by chromatography on silica gel eluting with 12% methanol in dichloromethane to afford **F4** (30 mg, 61%) as a yellow oil. <sup>1</sup>H NMR (400 MHz, methanol-*d*<sub>4</sub>) δ 8.57 (d, *J* = 4.7 Hz, 2H), 8.03 (s, 1H), 7.36 (d, *J* = 4.7 Hz, 2H), 6.78 (s, 1H), 3.22 (s, 2H), 2.84 – 2.70 (m, 4H), 2.45 (s, 3H), 2.13 – 2.04 (m, 2H), 2.02 – 1.95 (m, 2H). ESI-LRMS *m/z* [M+H]<sup>+</sup> calcd for C<sub>18</sub>H<sub>20</sub>N<sub>3</sub>O<sub>3</sub>: 326.2, found: 326.2.

## General procedure for the preparation of **G1** and **G2**

### Synthesis of intermediate **G1**

A mixture of **C8** (4.45 g, 16.56 mmol), 2,2-difluoroethyl trifluoromethanesulfonate (7.10 g, 33.12 mmol), and DIPEA (11.54 mL, 66.24 mmol) in THF (100 mL) was stirred at room temperature for 2.5 hours. The solvent was concentrated under reduced pressure, and the resulting residue was purified by silica gel chromatography eluting with 25% ethyl acetate in petroleum ether to afford **G1** as a yellow oil (2.84 g, 52%). <sup>1</sup>H NMR (400 MHz, chloroform-*d*) δ 7.83 (s, 1H), 6.87 (s, 1H), 5.89 (tt, *J* = 56.0, 4.3 Hz, 1H), 3.02 (s, 2H), 2.80 (td, *J* = 15.0, 4.3 Hz, 2H), 2.76 – 2.67 (m, 4H), 2.03 – 1.94 (m, 2H), 1.91 – 1.82 (m, 2H). ESI-LRMS *m/z* [M+H]<sup>+</sup> calcd for C<sub>14</sub>H<sub>16</sub>ClF<sub>2</sub>N<sub>2</sub>O<sub>3</sub>: 333.1, found: 333.1.

### Synthesis of intermediate **G2**

Intermediate **G2** was prepared from **C8** and 2,2,2-trifluoroethyl trifluoromethanesulfonate according to the general procedure for the preparation of **G1**.  $^1\text{H}$  NMR (400 MHz, chloroform-*d*)  $\delta$  7.83 (s, 1H), 6.87 (s, 1H), 3.08 – 2.96 (m, 4H), 2.90 – 2.75 (m, 4H), 2.05 – 1.94 (m, 2H), 1.91 – 1.84 (m, 2H).

### Synthesis of intermediate **H4**

A mixture of **F3** (158 mg, 0.51 mmol), 2-bromothiazole (167 mg, 1.02 mmol),  $\text{Pd}_2(\text{dba})_3$  (46 mg, 0.05 mmol), *rac*-BINAP (62 mg, 0.10 mmol), and cesium carbonate (664 mg, 2.04 mmol) in 1,4-dioxane (3.5 mL) was heated to 80 °C under an argon atmosphere for 20 hours. The mixture was cooled to room temperature and concentrated. The residue was purified by silica gel chromatography eluting with 40% petroleum ether in ethyl acetate to afford **H4** as a yellow solid (62 mg, 31%).  $^1\text{H}$  NMR (400 MHz, methanol-*d*<sub>4</sub>)  $\delta$  8.57 (d,  $J$  = 6.2 Hz, 2H), 8.04 (s, 1H), 7.37 (d,  $J$  = 6.2 Hz, 2H), 7.15 (d,  $J$  = 3.7 Hz, 1H), 6.81 (s, 1H), 6.75 (d,  $J$  = 3.7 Hz, 1H), 3.82 – 3.72 (m, 2H), 3.65 – 3.55 (m, 2H), 3.25 (s, 2H), 2.13 – 1.96 (m, 4H). ESI-LRMS  $m/z$  [ $\text{M}+\text{H}$ ]<sup>+</sup> calcd for  $\text{C}_{20}\text{H}_{19}\text{N}_4\text{O}_3\text{S}$ : 395.1, found: 395.0.

### Synthesis of intermediate **I1**

A mixture of **C8** (3.13 g, 11.65 mmol), acetic anhydride (3.57 g, 34.97 mmol) DMAP (142 mg, 1.17 mmol), and TEA (8.09 mL, 58.24 mmol) in dichloromethane (20 mL) was stirred at room temperature for 12 hours. Then the mixture was diluted with dichloromethane, washed with water and brine. The organic phase was dried over anhydrous sodium sulfate, filtered, and concentrated. The residue was purified by silica gel chromatography eluting with 4% methanol in dichloromethane to afford **I1** as a yellow oil (3.50 g, 97%).  $^1\text{H}$  NMR (400 MHz, chloroform-*d*)  $\delta$  7.85 (s, 1H), 6.90 (s, 1H), 4.33 – 4.25 (m, 1H), 3.71 – 3.52 (m, 2H), 3.31 – 3.21 (m, 1H), 3.05 (s, 2H), 2.14 (s, 3H), 2.04 – 1.94 (m, 2H), 1.78 – 1.74 (m, 2H).

### <sup>1</sup>H NMR spectra for intermediates.

2-(1-((2-(trimethylsilyl)ethoxy)methyl)-1H-pyrazol-4-yl)oxazole-4-carboxylic acid

(A1)

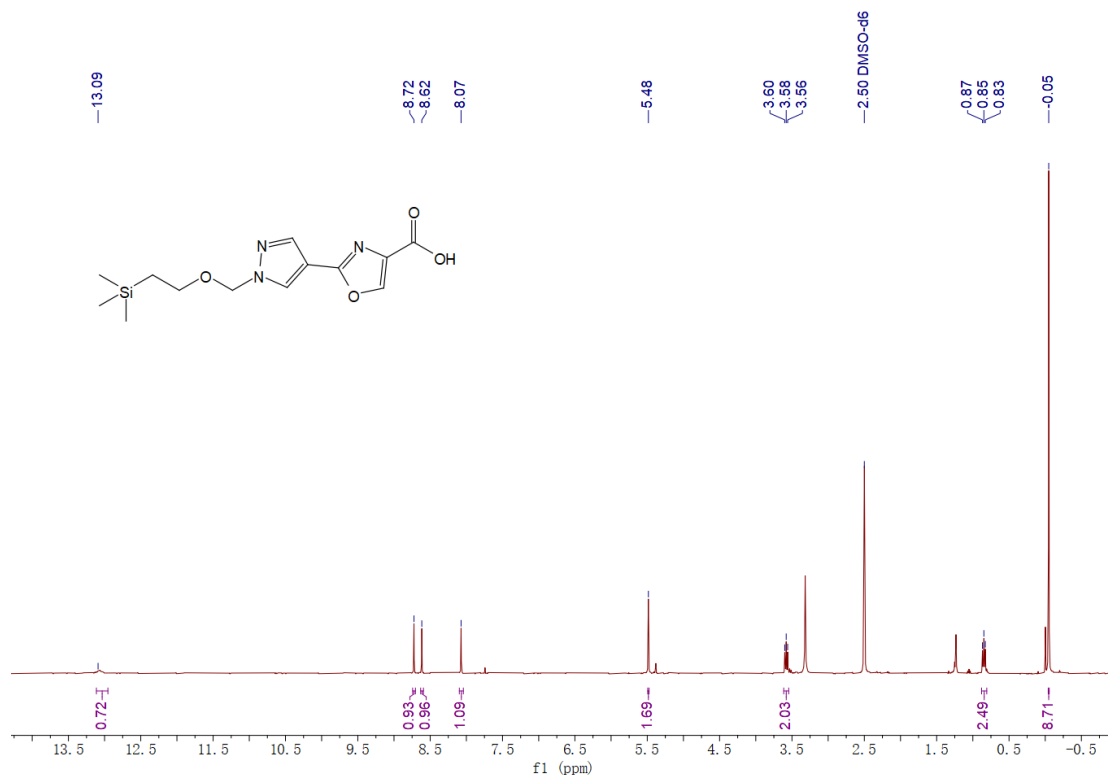

2-(3-sulfamoylphenyl)oxazole-4-carboxylic acid (A3)

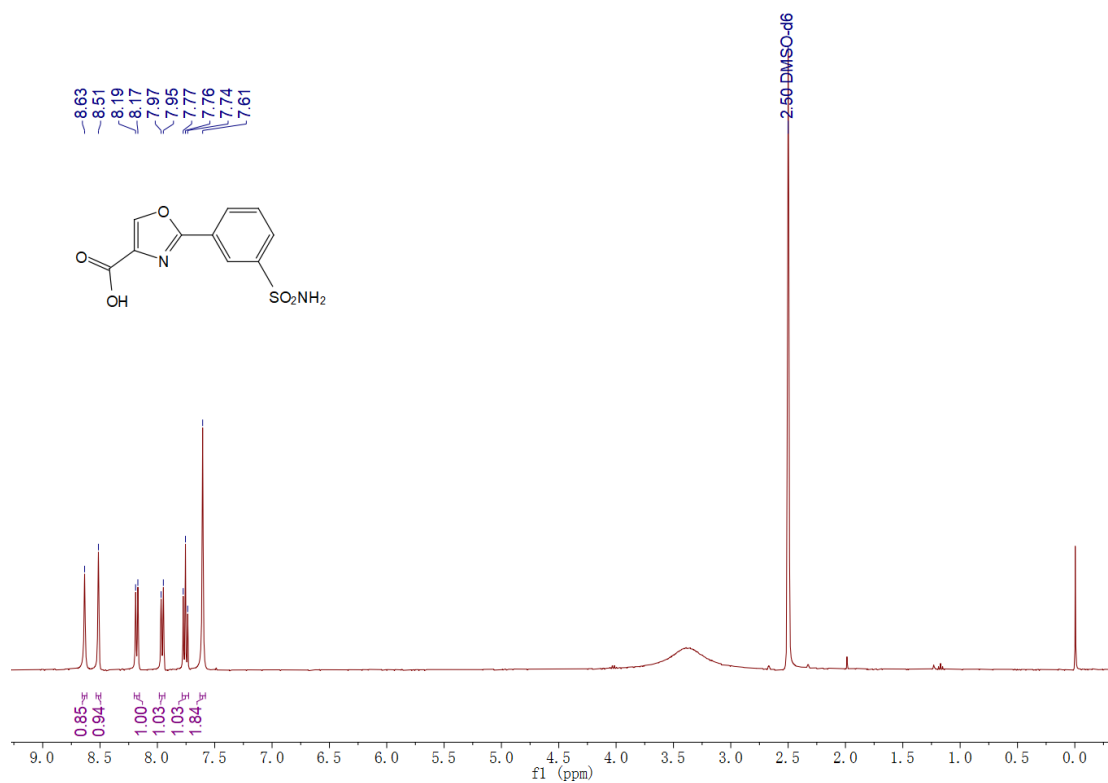

2-(6-(benzyloxy)pyridin-3-yl)oxazole-4-carboxylic acid (A5)

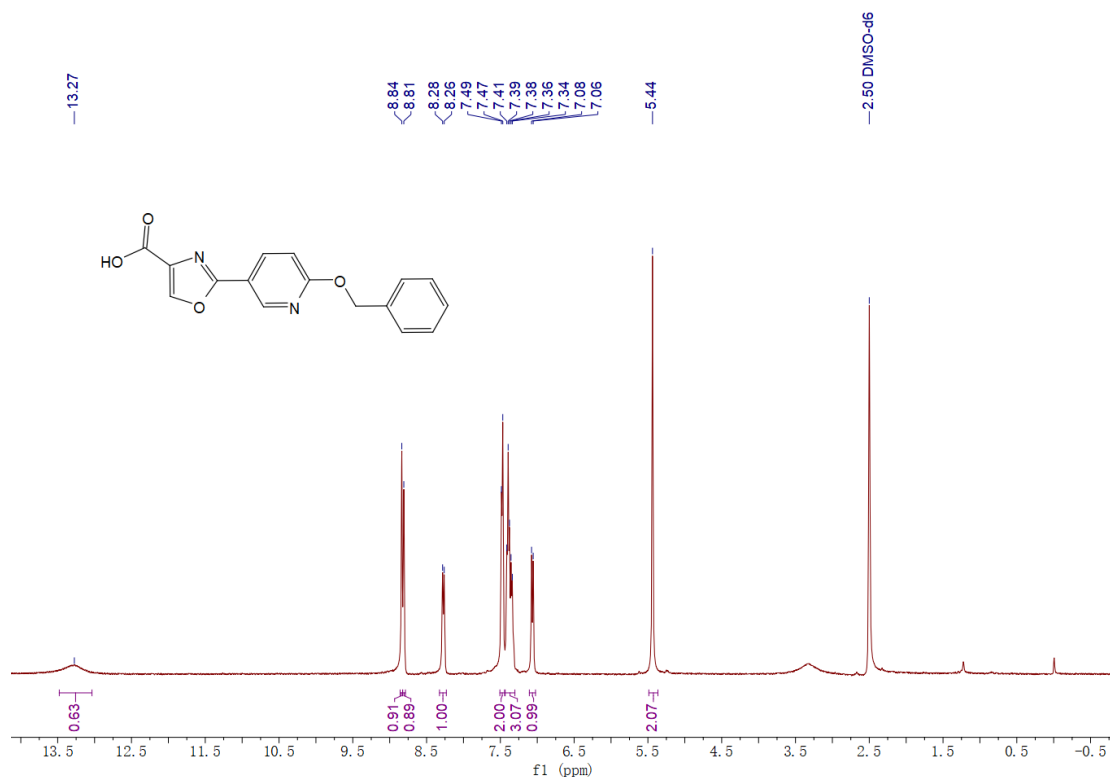

2-(2-(difluoromethyl)pyridin-4-yl)oxazole-4-carboxylic acid (A7)

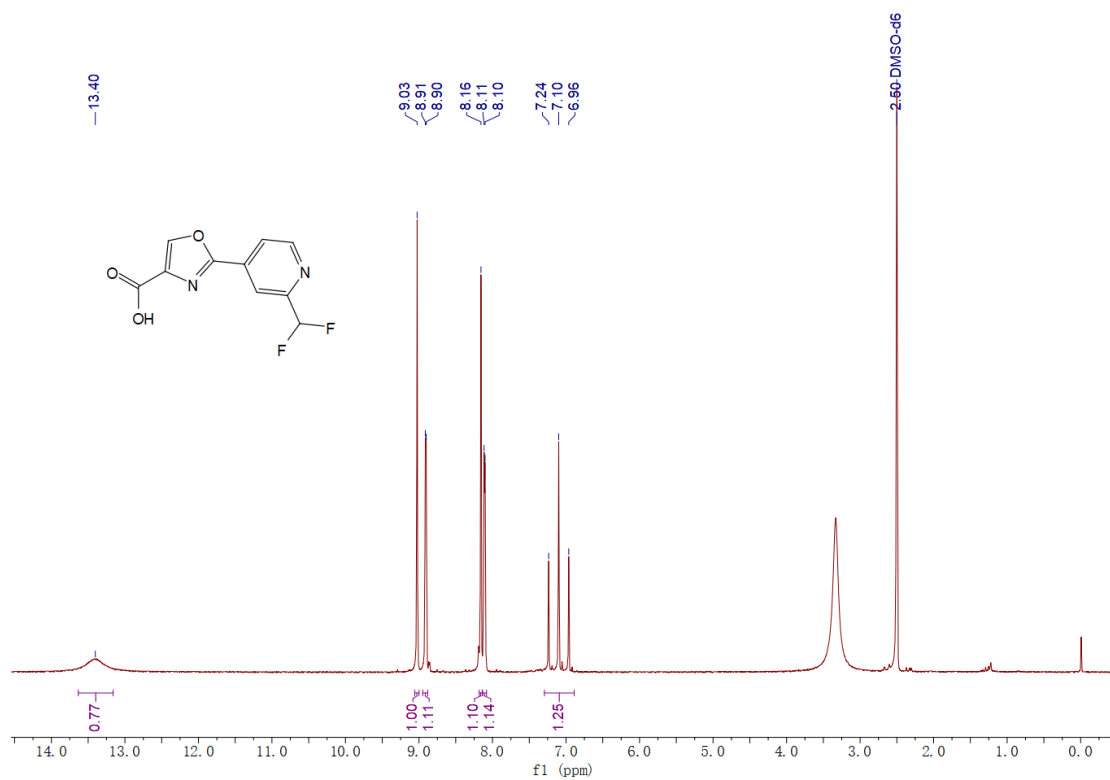

ethyl 2-(1-((2-(trimethylsilyl)ethoxy)methyl)-1H-pyrazol-4-yl)oxazole-4-carboxylate  
(A11)

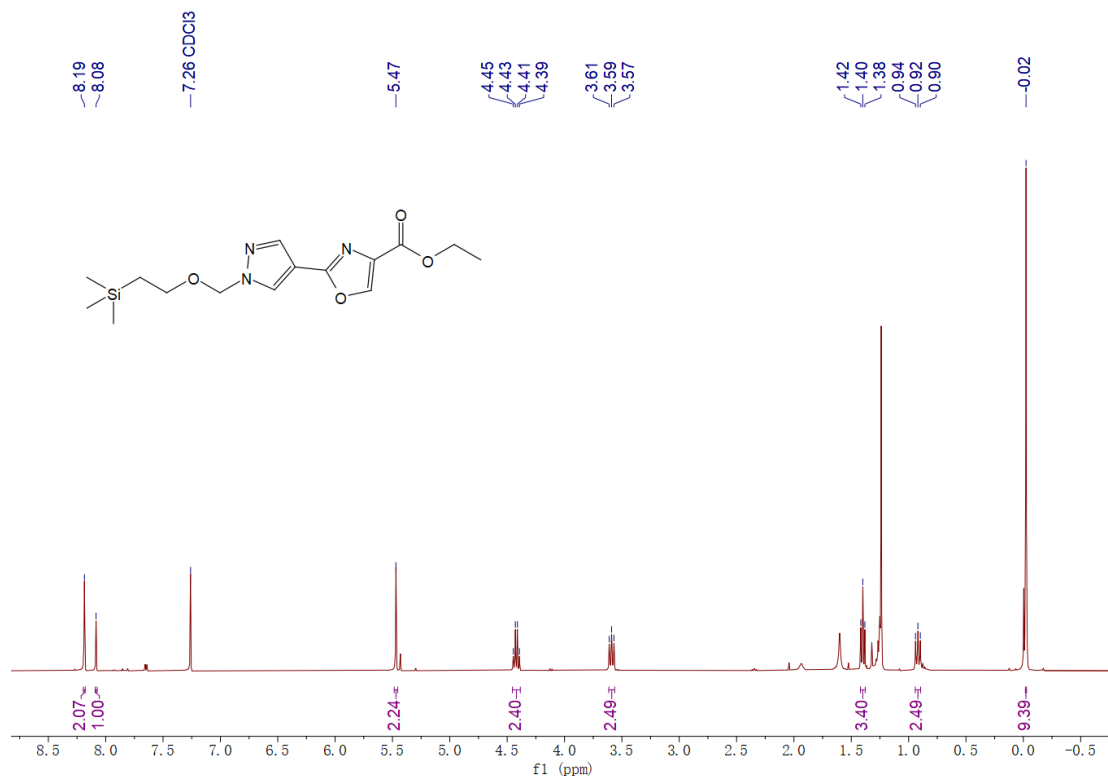

ethyl 2-(2-(difluoromethyl)pyridin-4-yl)oxazole-4-carboxylate (A19)

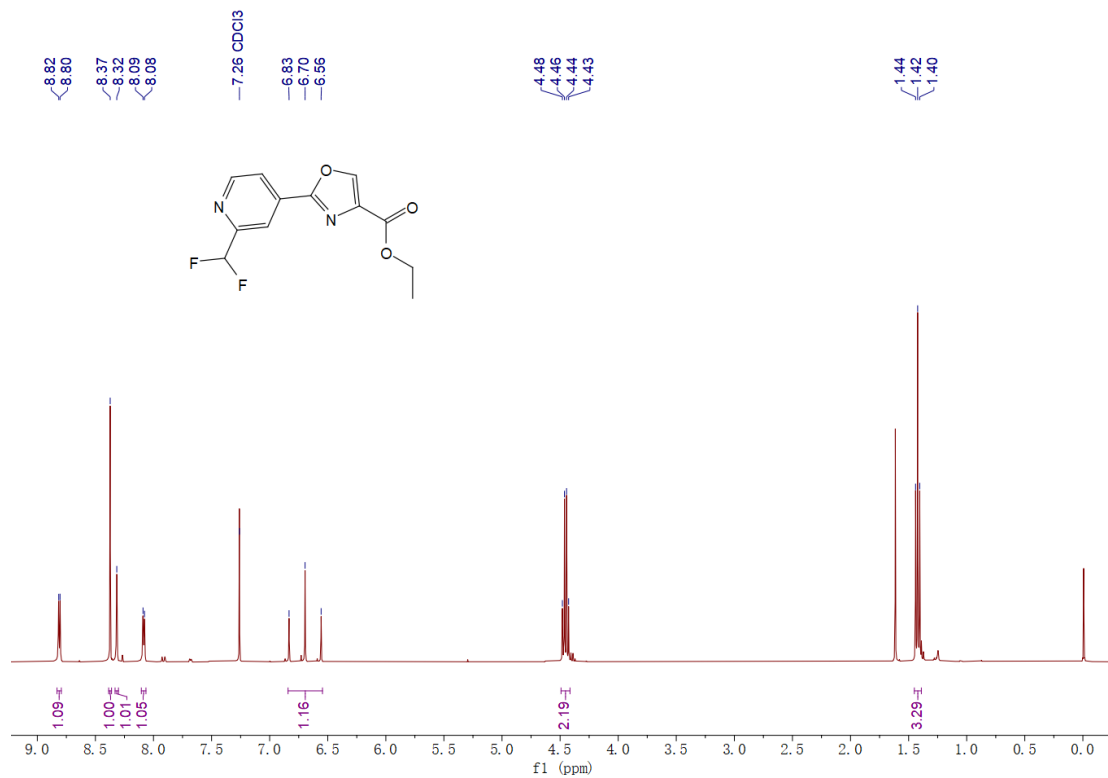

2,2-dimethyl-6-(pyridin-4-yl)-2,3-dihydrobenzofuran-5-amine (**B1**)

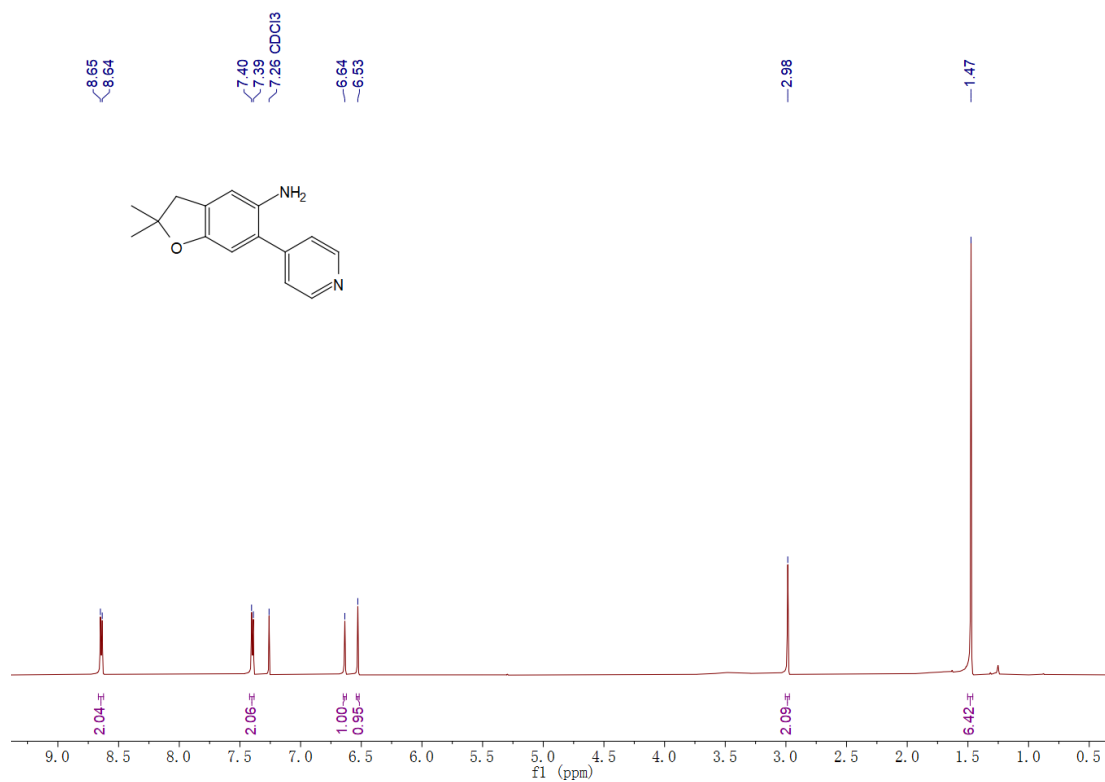

4-(2,2-dimethyl-5-nitro-2,3-dihydrobenzofuran-6-yl)pyridine (**B7**)

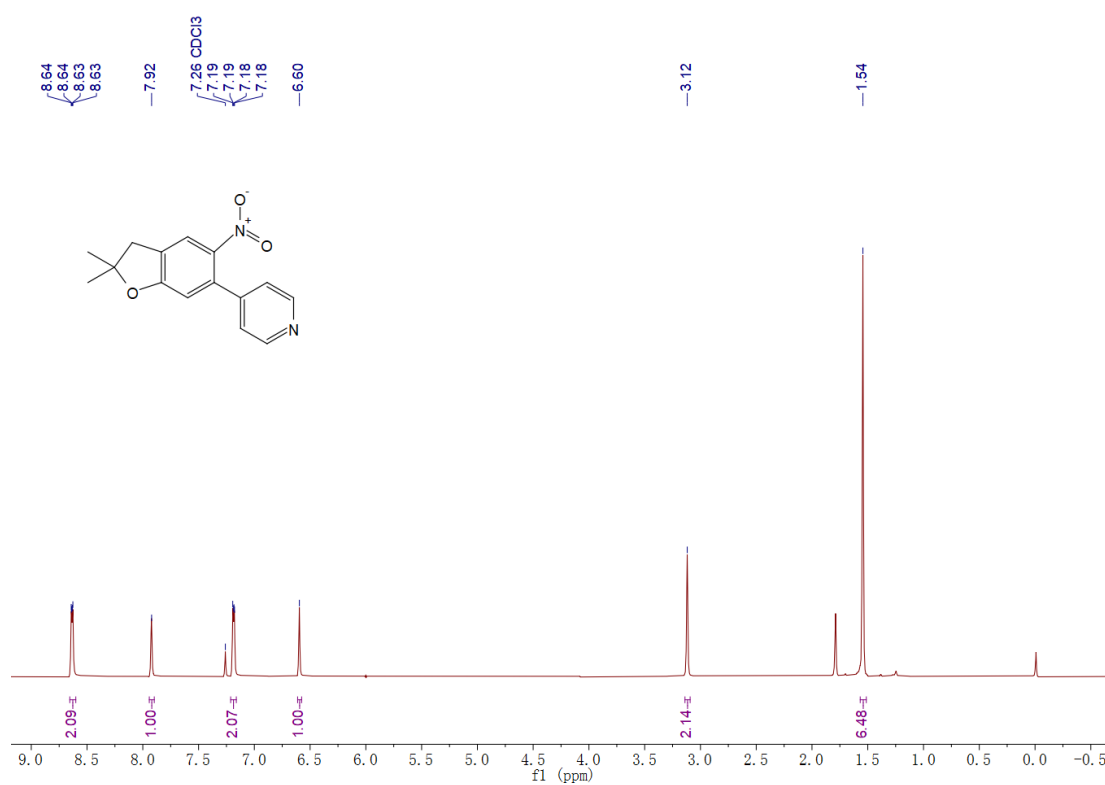

*tert*-butyl

5-nitro-6-(pyridin-4-yl)-3*H*-spiro[benzofuran-2,4'-piperidine]-1'-

carboxylate (C1)

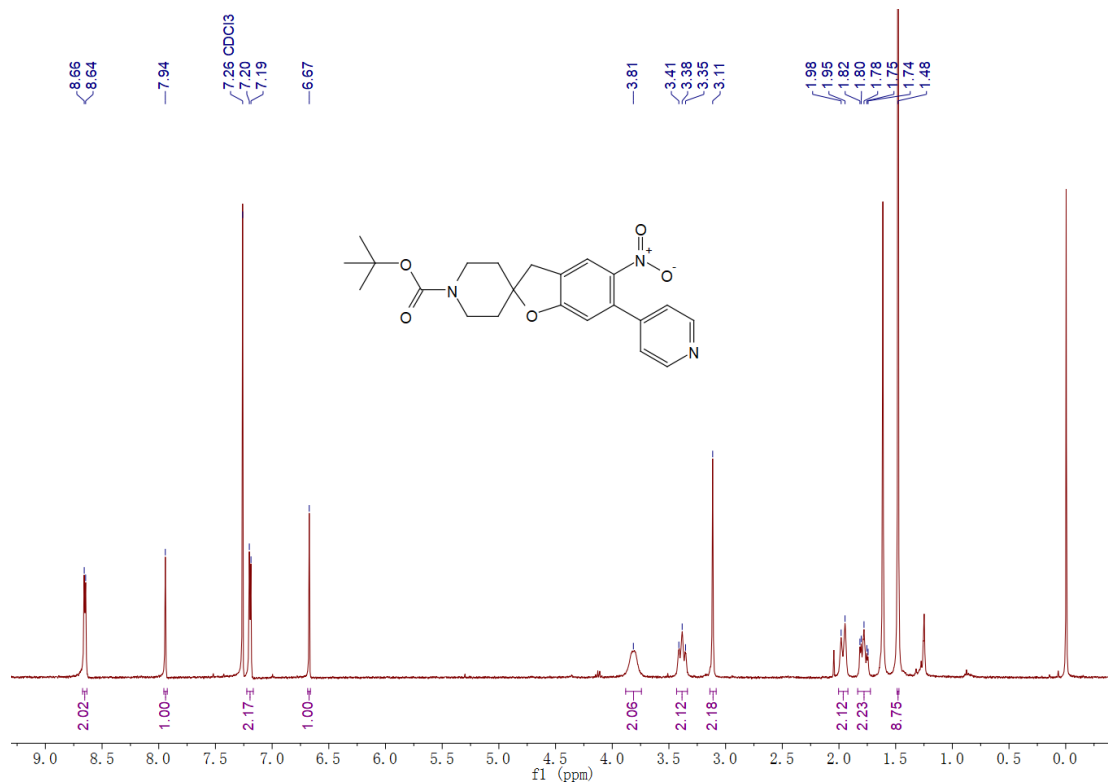

*tert*-butyl 6-chloro-3*H*-spiro[benzofuran-2,4'-piperidine]-1'-carboxylate (C4)

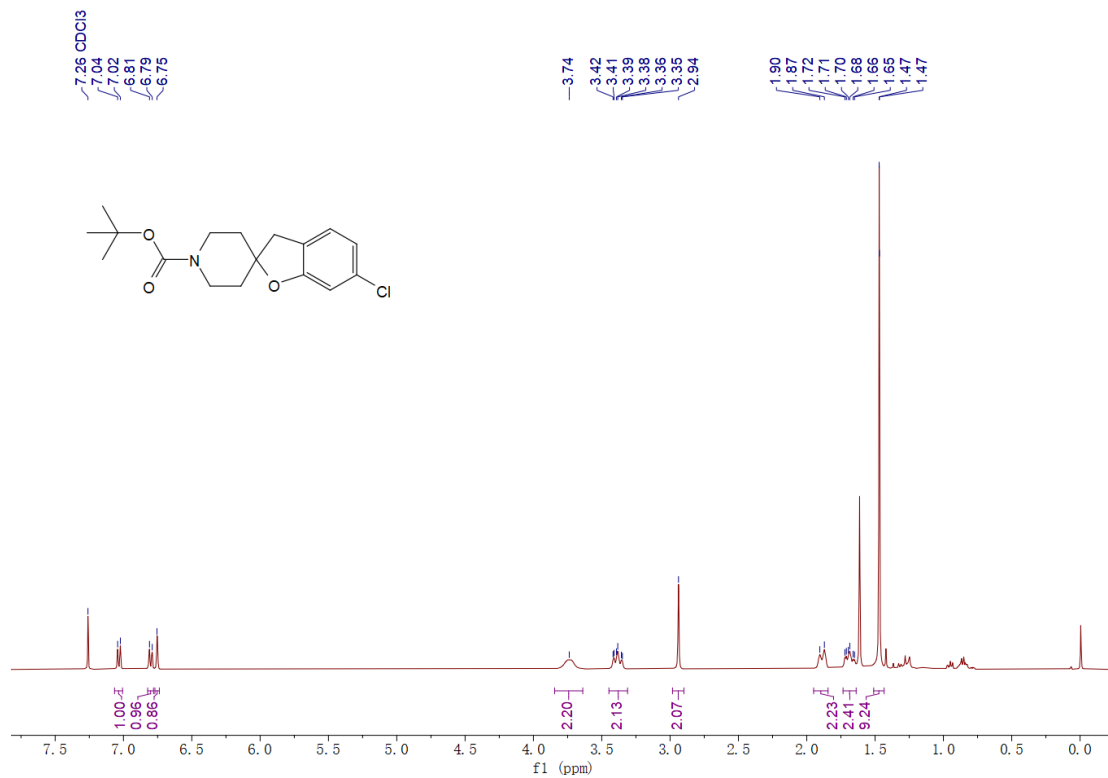

1-(6-chloro-3H-spiro[benzofuran-2,4'-piperidin]-1'-yl)-2,2,2-trifluoroethan-1-one

(C6)

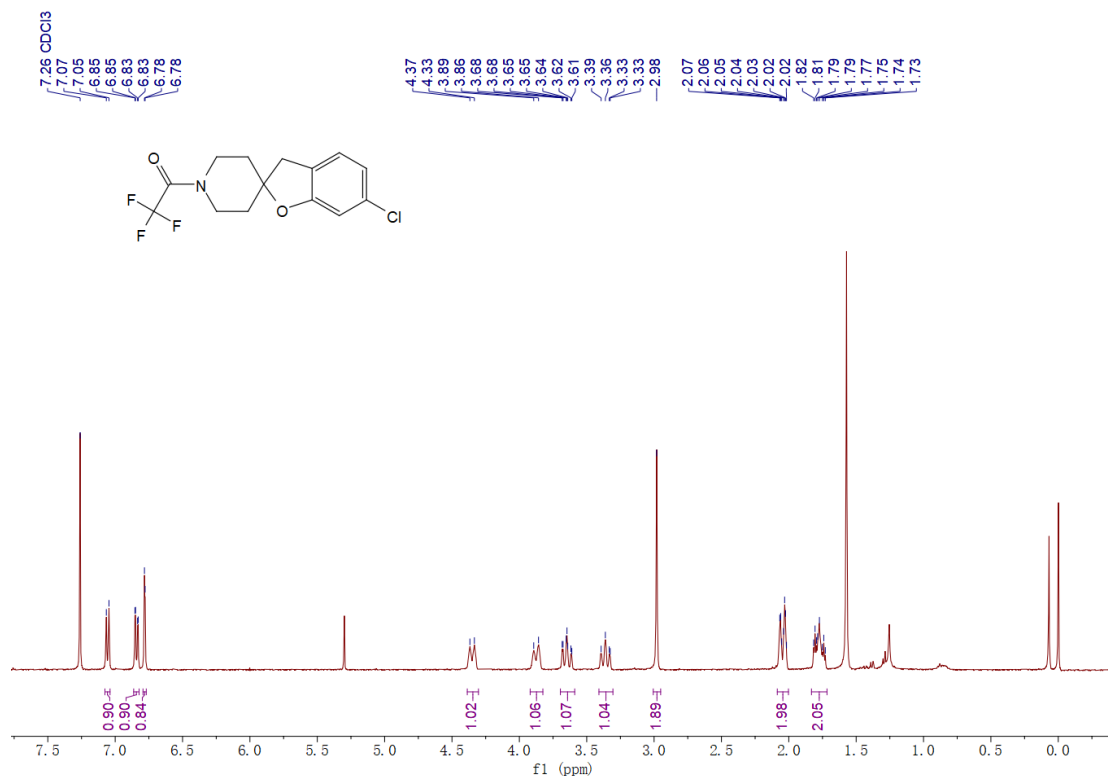

1-(6-chloro-5-nitro-3H-spiro[benzofuran-2,4'-piperidin]-1'-yl)-2,2,2-trifluoroethan-1-one (C7)

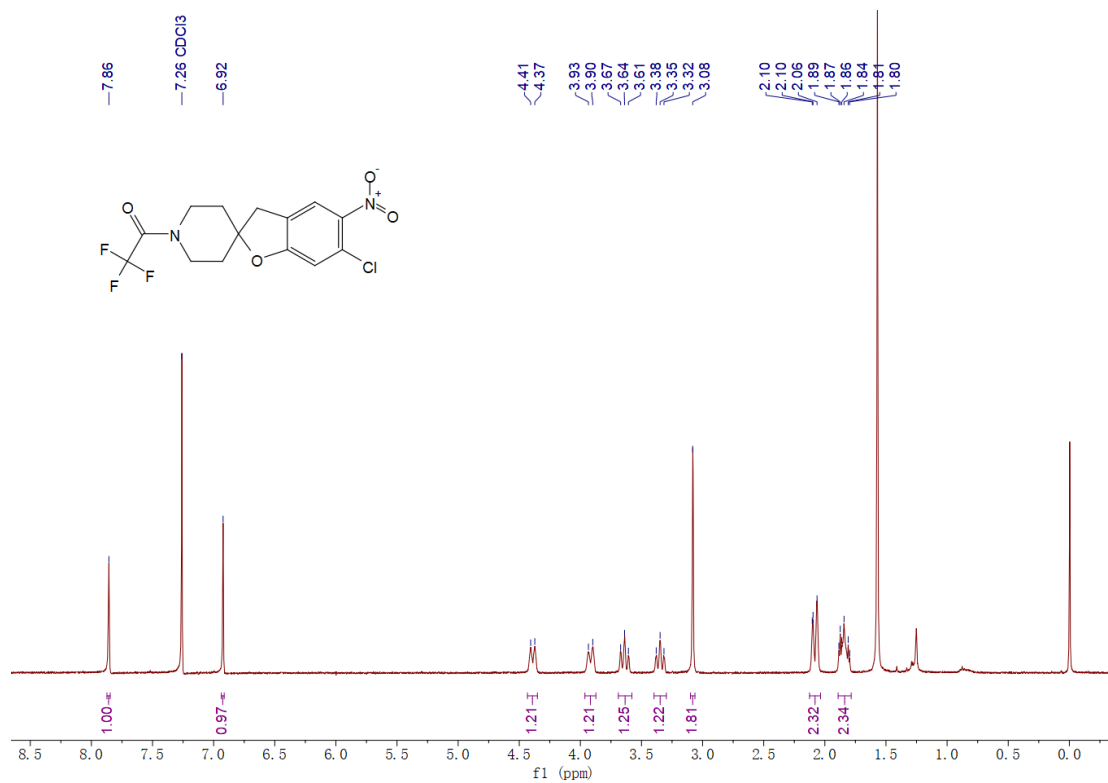

2-(6-(benzyloxy)pyridin-3-yl)-*N*-(2,2-dimethyl-6-(pyridin-4-yl)-2,3-dihydrobenzofuran-5-yl)oxazole-4-carboxamide (**D1**)

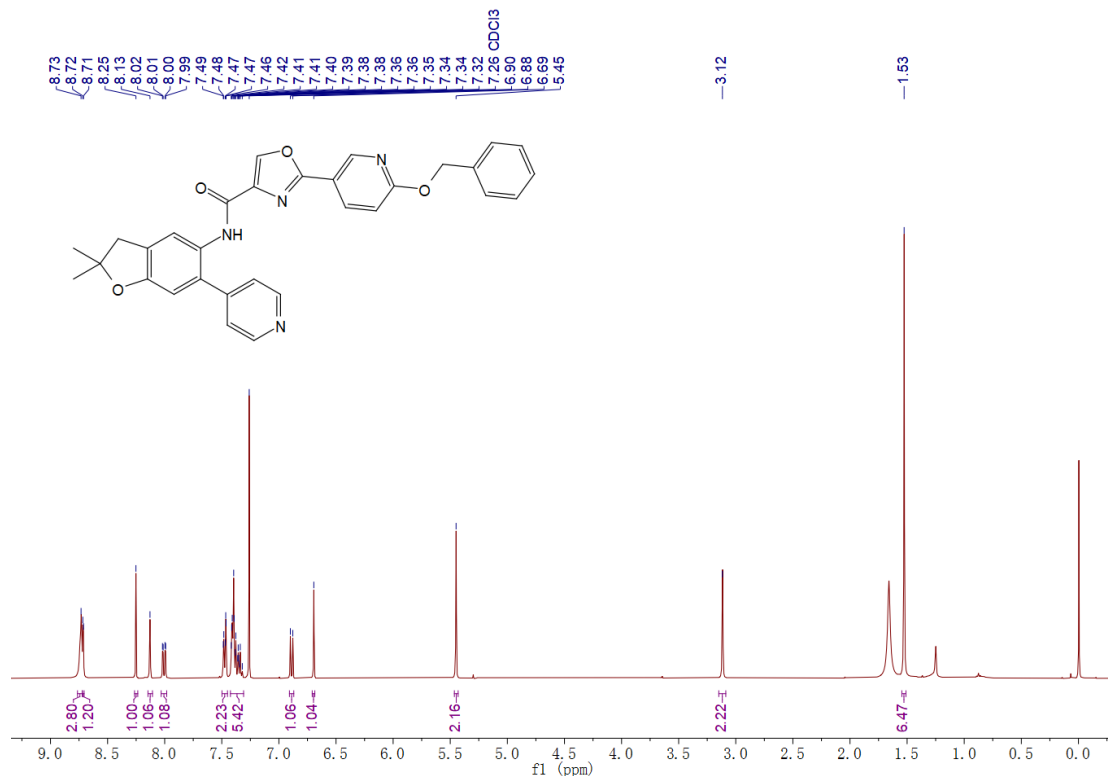

*N*-(2,2-dimethyl-6-(pyridin-4-yl)-2,3-dihydrobenzofuran-5-yl)-2-(1-((2-(trimethylsilyl)ethoxy)methyl)-1*H*-pyrazol-4-yl)oxazole-4-carboxamide (**D3**)

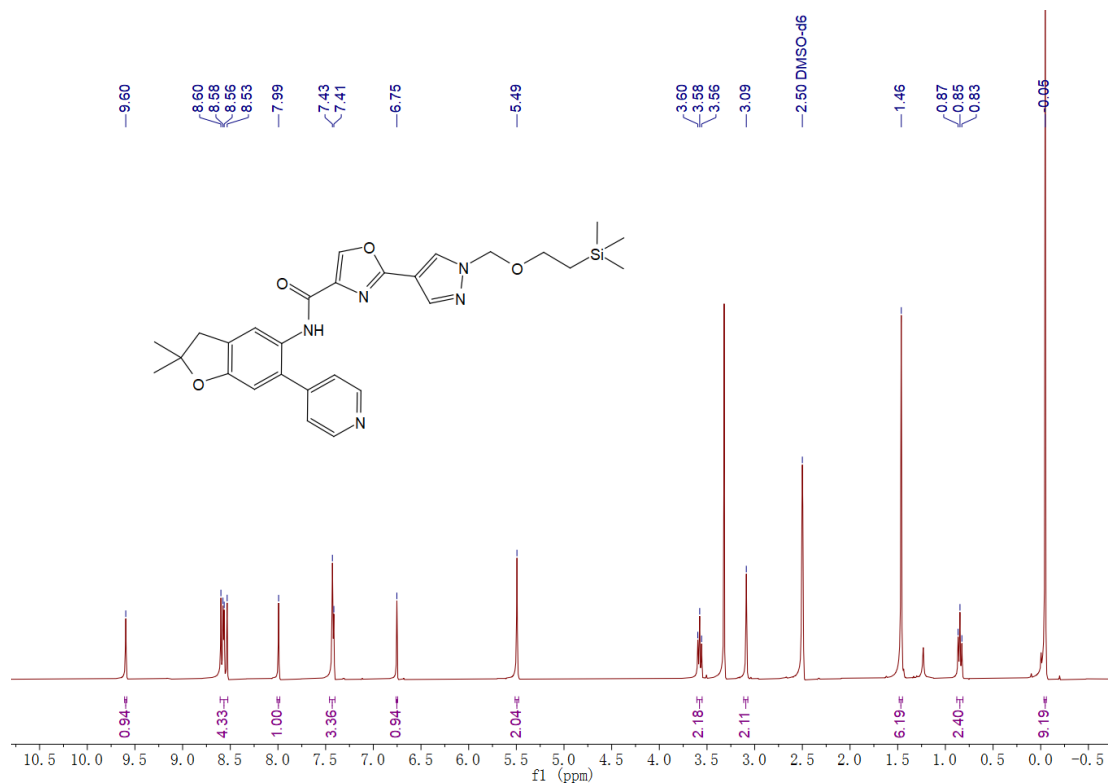

ethyl 2-(4-chloro-2-fluorophenyl)-2,2-difluoroacetate (**E2**)

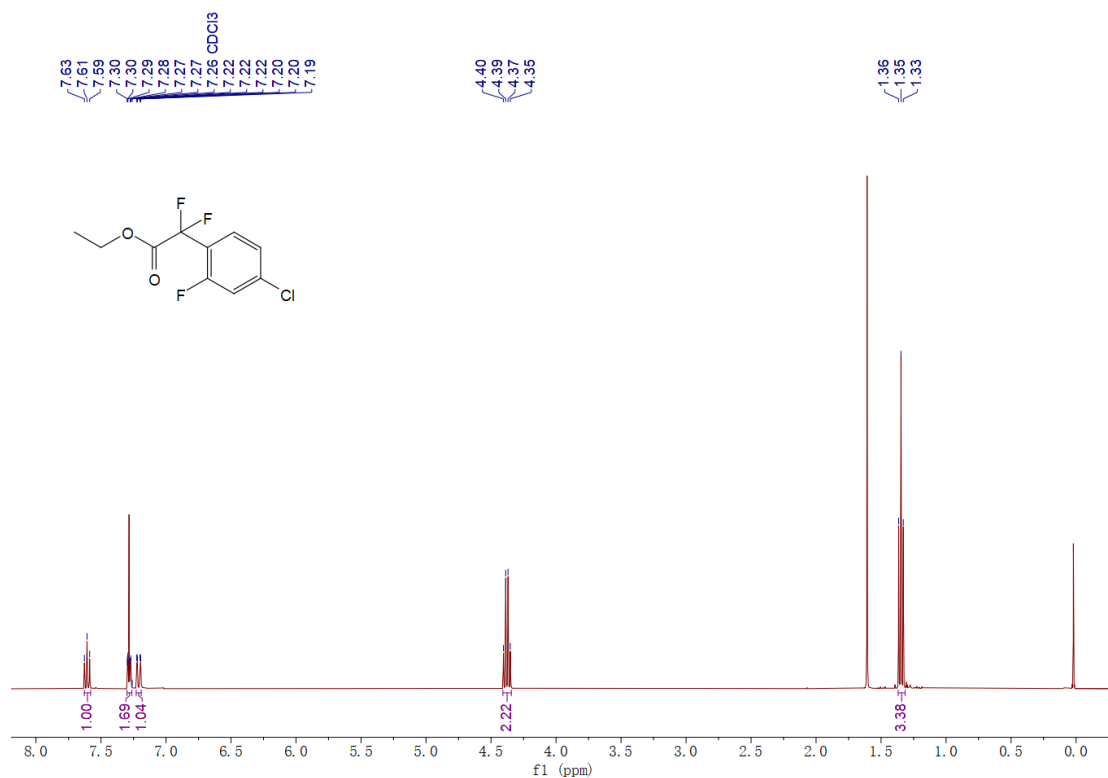

4-(3,3-difluoro-2,2-dimethyl-5-nitro-2,3-dihydrobenzofuran-6-yl)pyridine (**E6**)

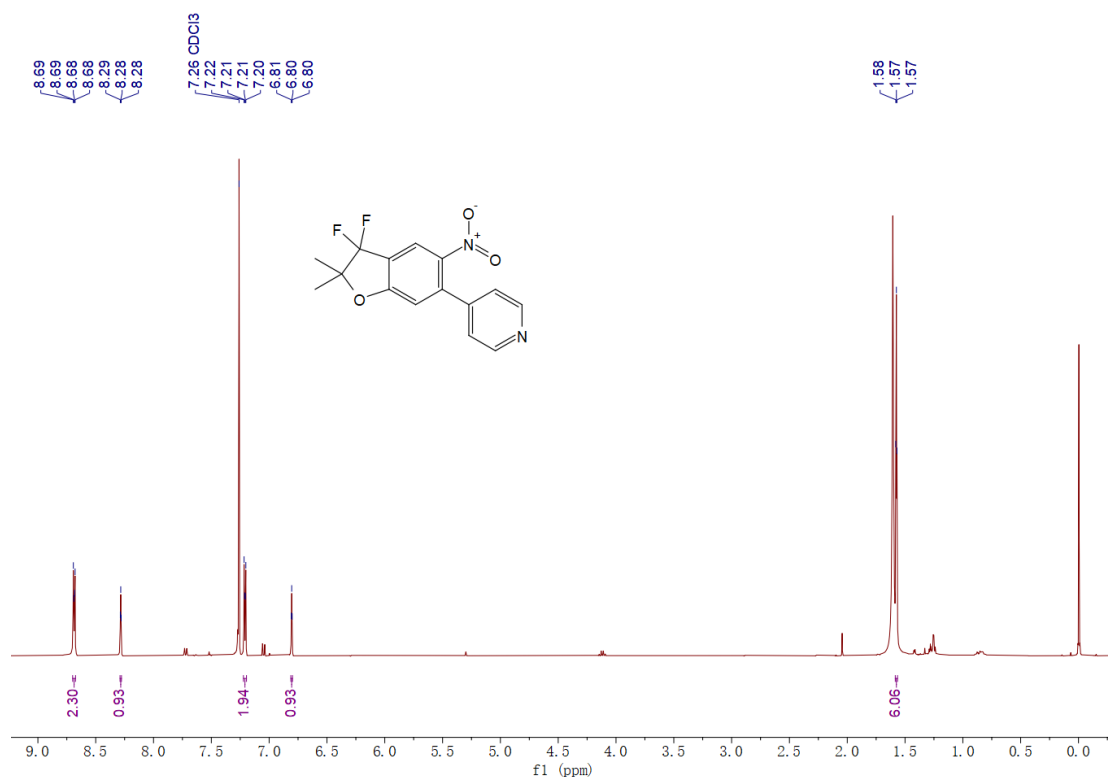

*tert*-butyl 5-(2-(2-aminopyridin-4-yl)oxazole-4-carboxamido)-6-(pyridin-4-yl)-3*H*-spiro[benzofuran-2,4'-piperidine]-1'-carboxylate (**F2**)

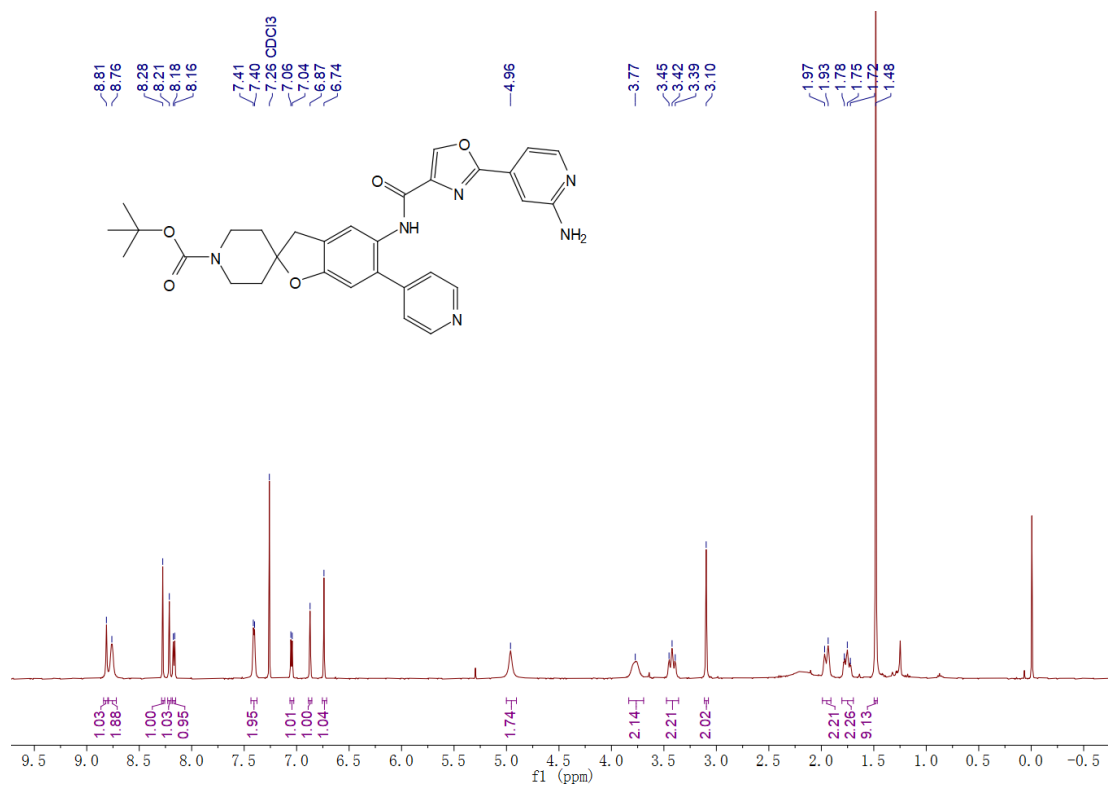

1'-methyl-5-nitro-6-(pyridin-4-yl)-3*H*-spiro[benzofuran-2,4'-piperidine] (**F4**)

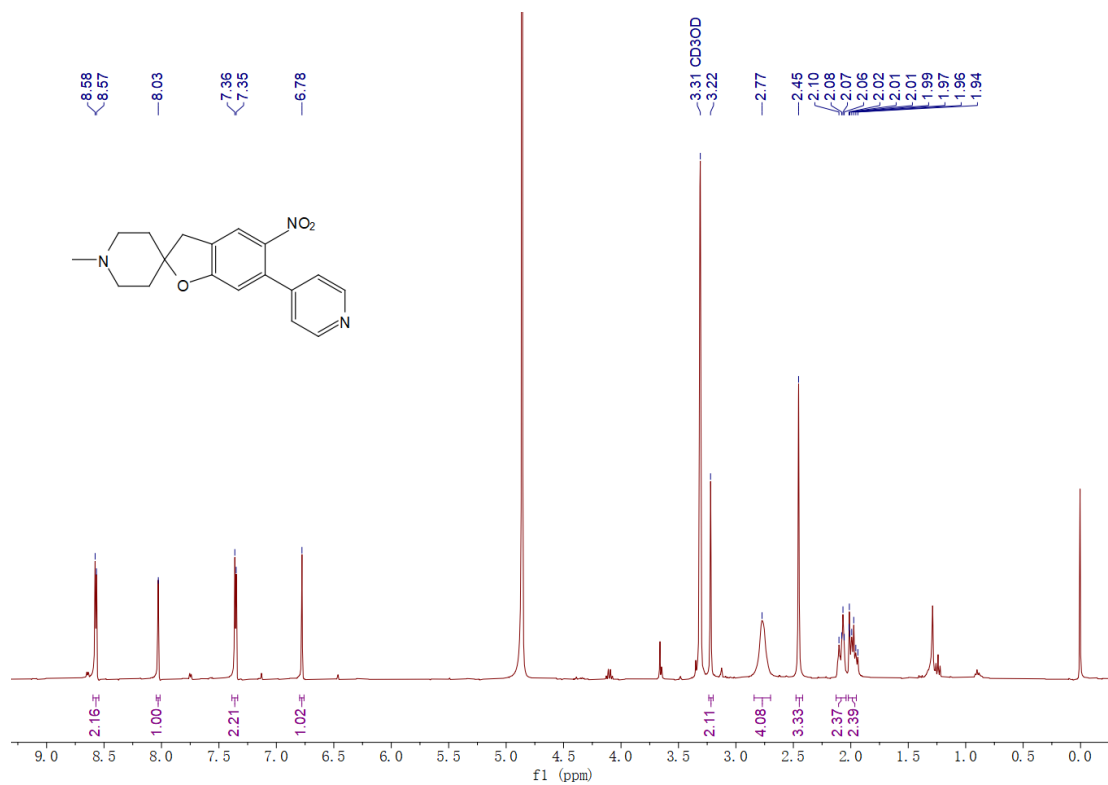

6-chloro-1'-(2,2-difluoroethyl)-5-nitro-3*H*-spiro[benzofuran-2,4'-piperidine] (G1)

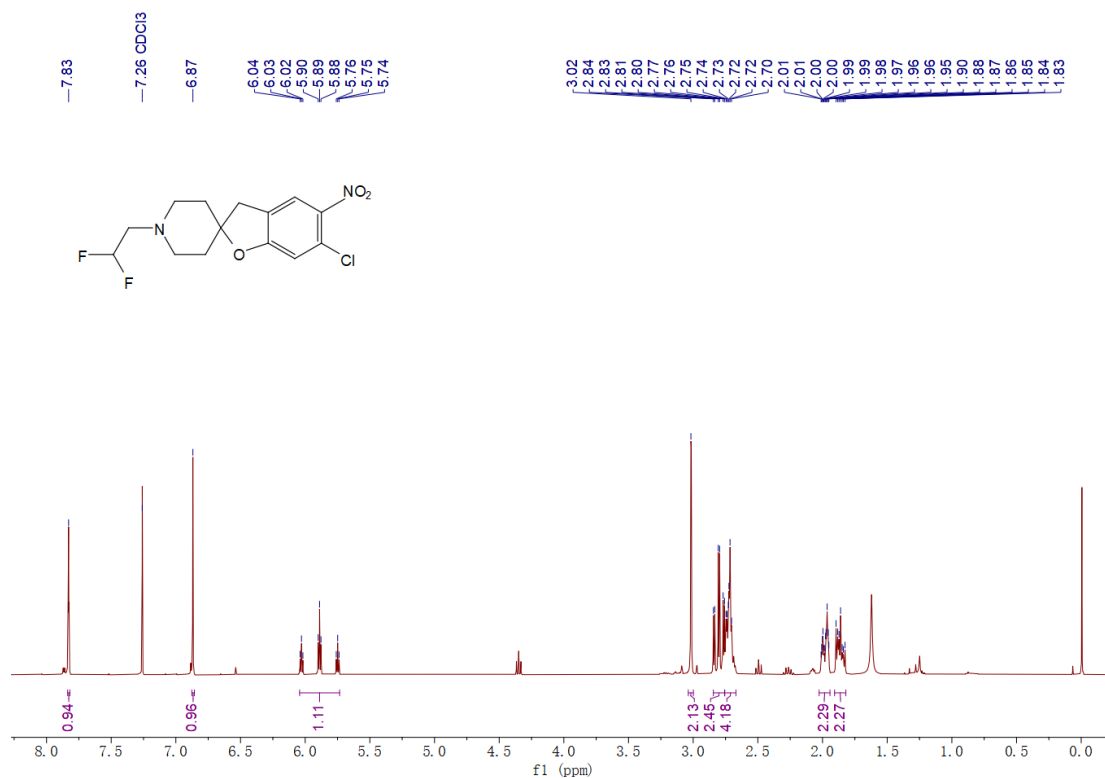

6-chloro-5-nitro-1'-(2,2,2-trifluoroethyl)-3*H*-spiro[benzofuran-2,4'-piperidine] (G2)

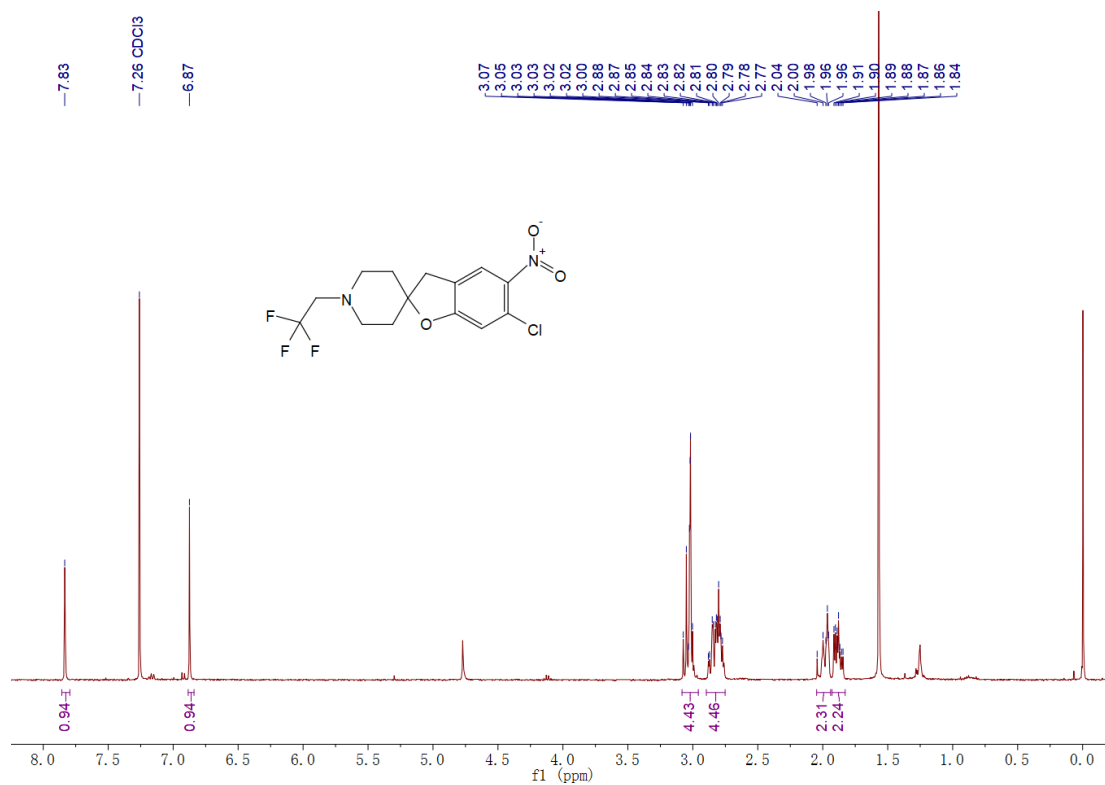

1'-(2,2-difluoroethyl)-5-nitro-6-(pyridin-4-yl)-3H-spiro[benzofuran-2,4'-piperidine]

(G3)

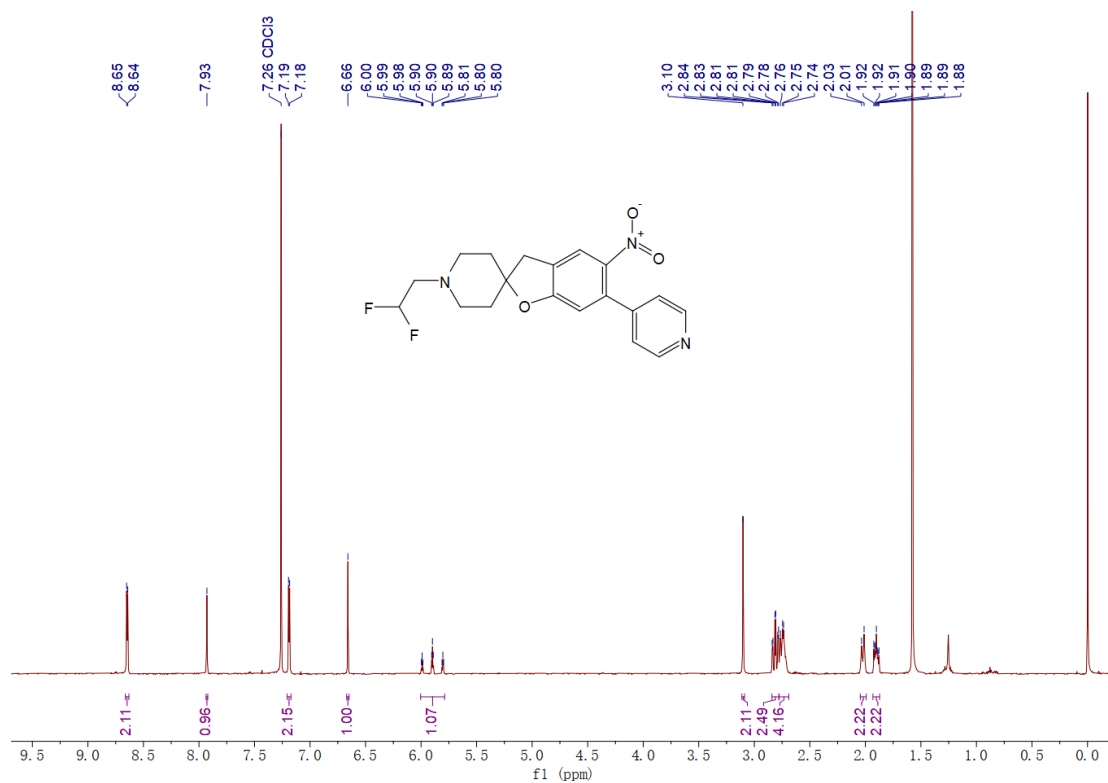

1'-(2,2-difluoroethyl)-6-(pyridin-4-yl)-3H-spiro[benzofuran-2,4'-piperidin]-5-amine

(G5)

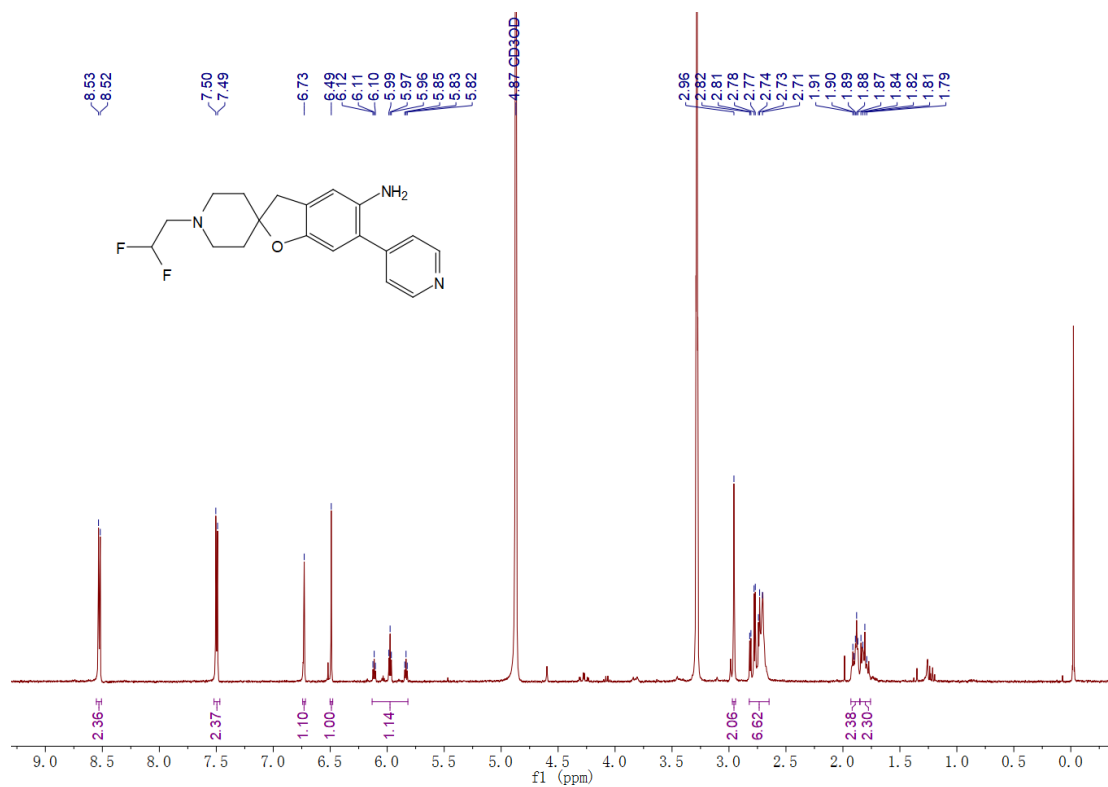

2-(5-nitro-6-(pyridin-4-yl)-3H-spiro[benzofuran-2,4'-piperidin]-1'-yl)-2-oxoethyl acetate (**H1**)

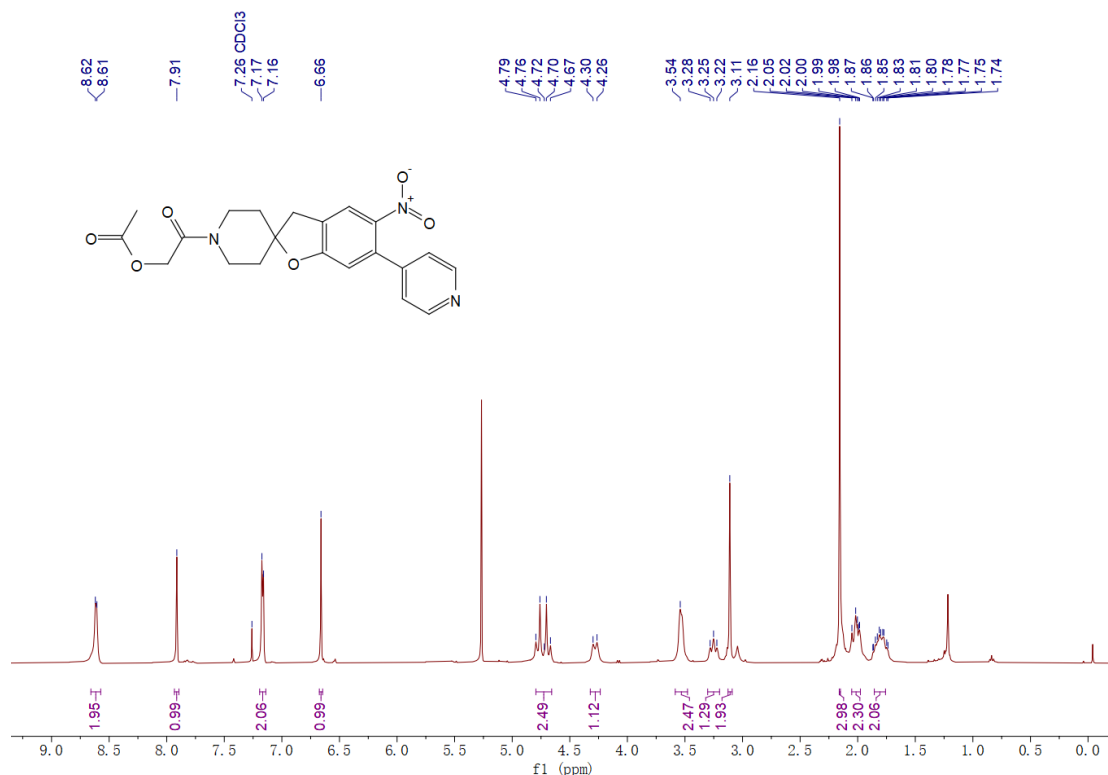

5-nitro-6-(pyridin-4-yl)-1'-(thiazol-2-yl)-3H-spiro[benzofuran-2,4'-piperidine] (**H4**)

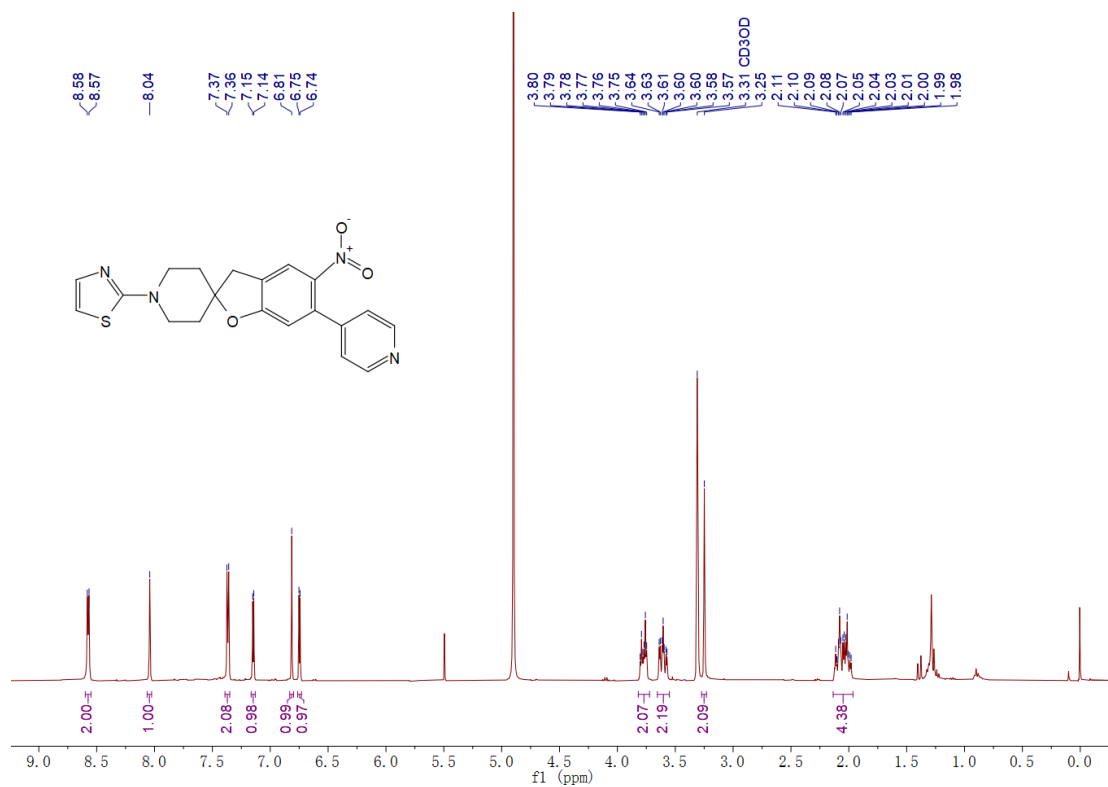

6-(pyridin-4-yl)-1'-(thiazol-2-yl)-3*H*-spiro[benzofuran-2,4'-piperidin]-5-amine (**H5**)

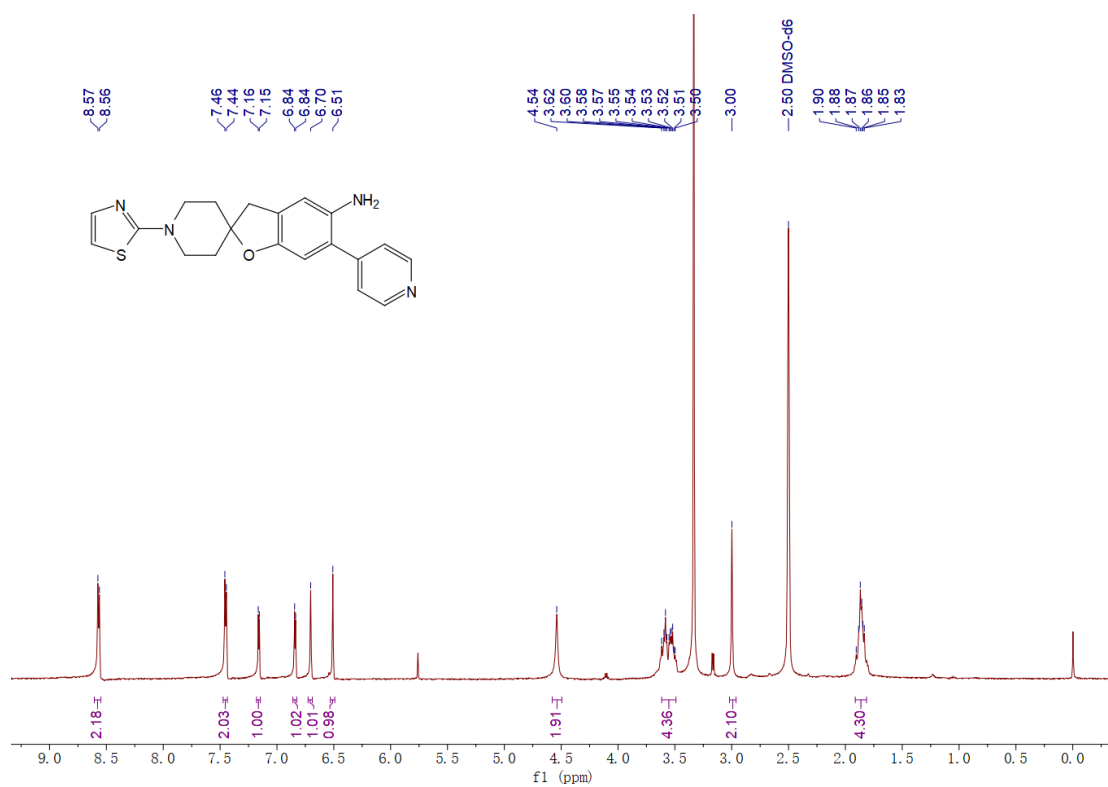

**<sup>1</sup>H NMR, <sup>13</sup>C NMR, and HRMS spectra for target compounds 1–21 and DW18134.**

2-(2-aminopyridin-4-yl)-*N*-(2,2-dimethyl-6-(pyridin-4-yl)-2,3-dihydrobenzofuran-5-yl)oxazole-4-carboxamide (DW18134)

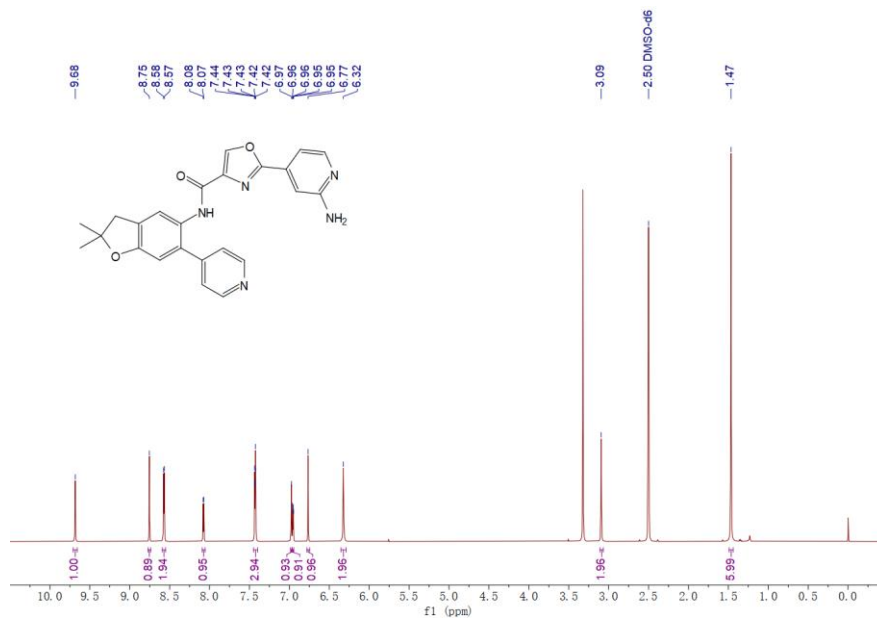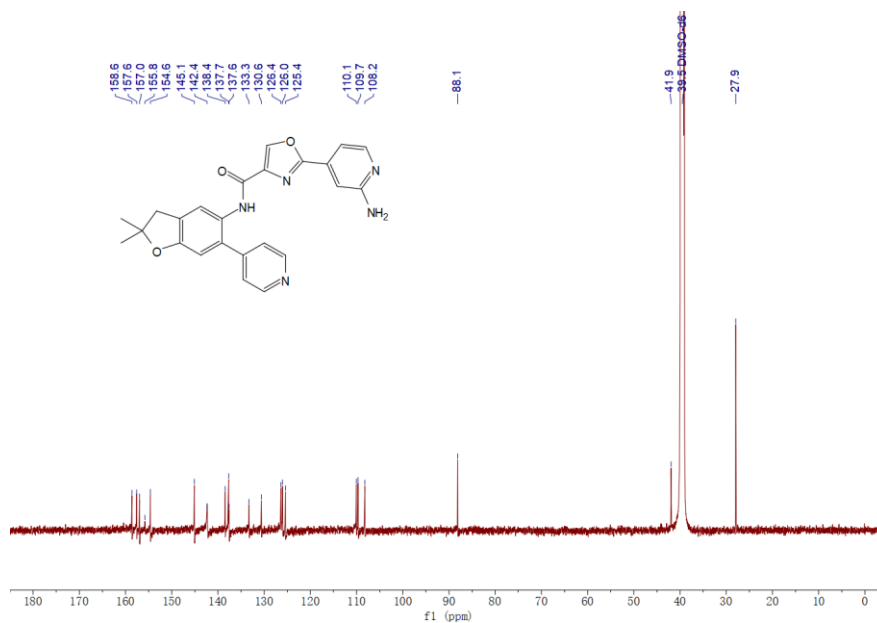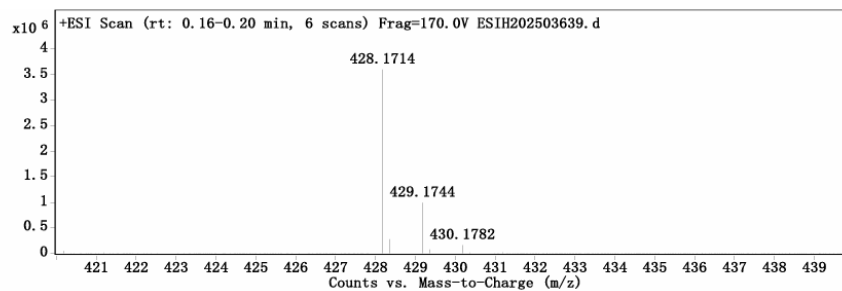

2-(2-(difluoromethyl)pyridin-4-yl)-*N*-(2,2-dimethyl-6-(pyridin-4-yl)-2,3-dihydrobenzofuran-5-yl)oxazole-4-carboxamide (**1**)

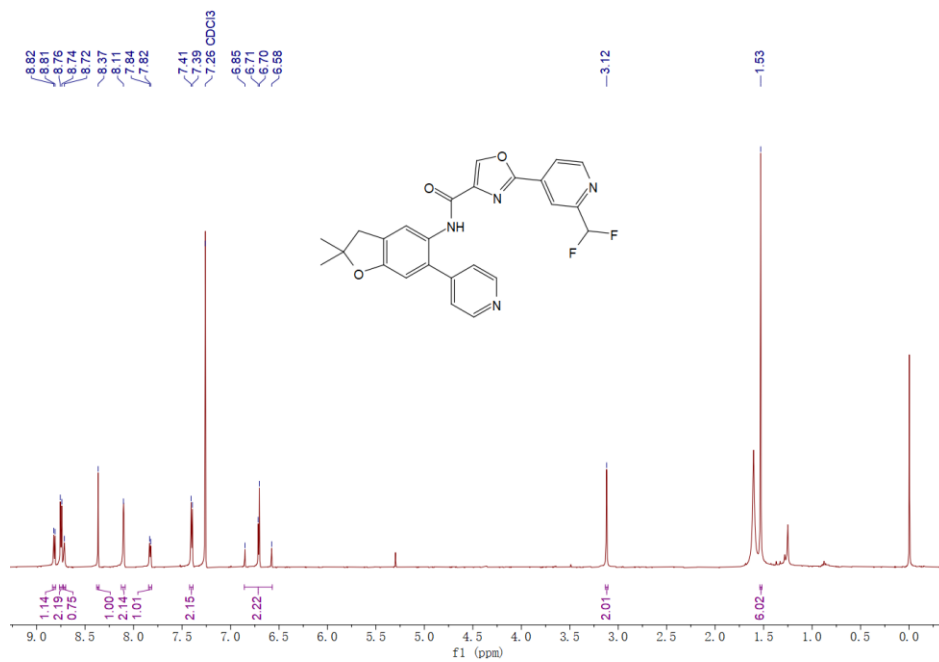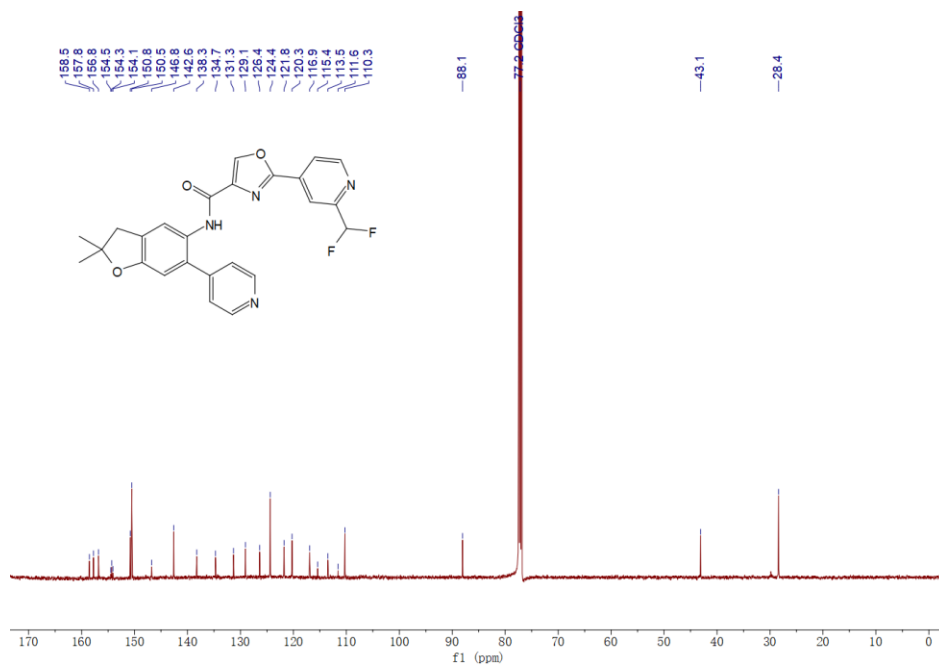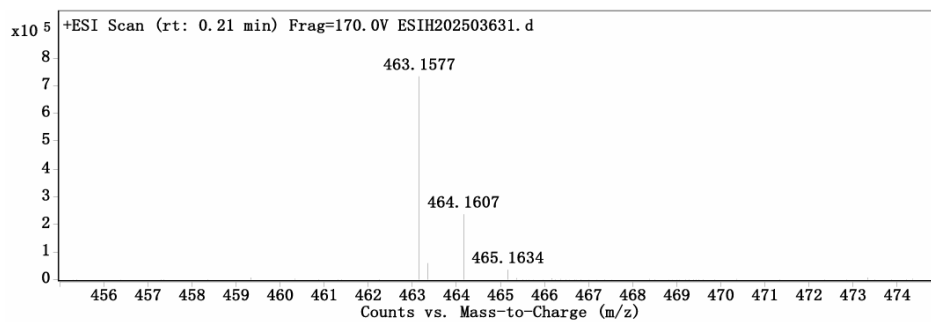

2-(2-(difluoromethoxy)pyridin-4-yl)-*N*-(2,2-dimethyl-6-(pyridin-4-yl)-2,3-dihydrobenzofuran-5-yl)oxazole-4-carboxamide (**2**)

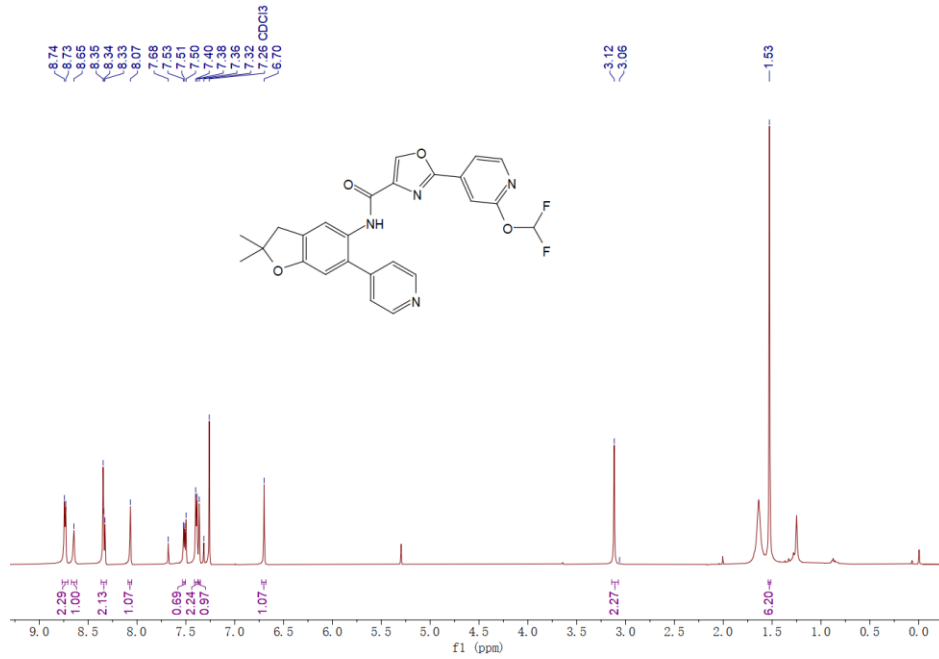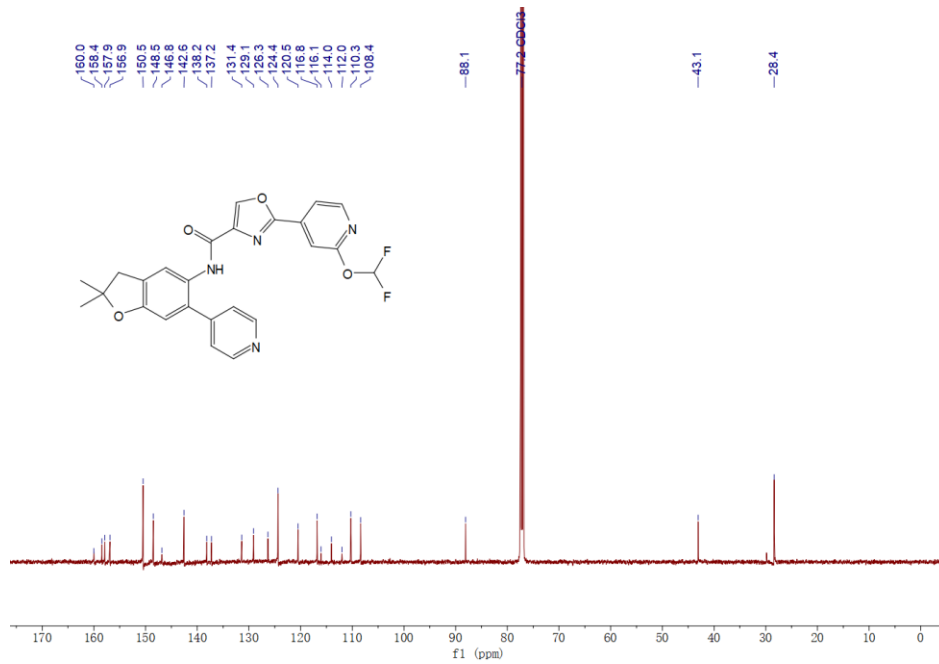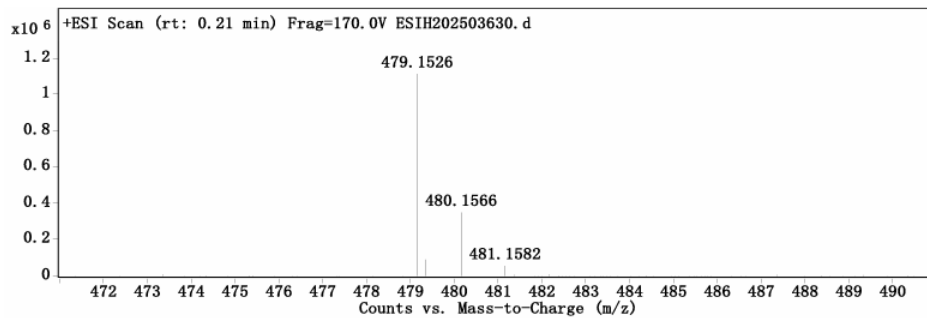

*N*-(2,2-dimethyl-6-(pyridin-4-yl)-2,3-dihydrobenzofuran-5-yl)-2-(2-((2,2,2-trifluoroethyl)amino)pyridin-4-yl)oxazole-4-carboxamide (**3**)

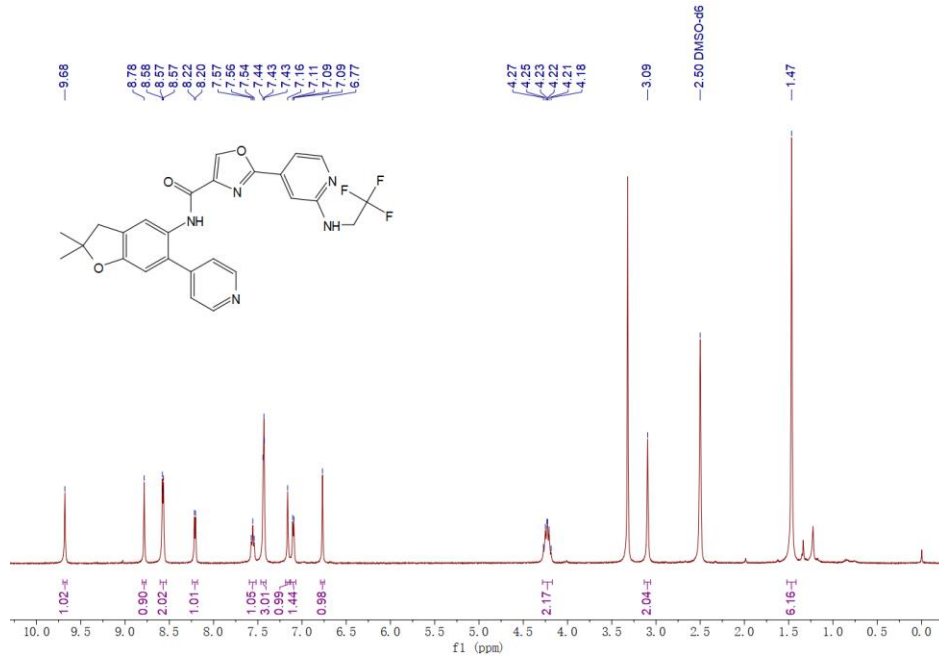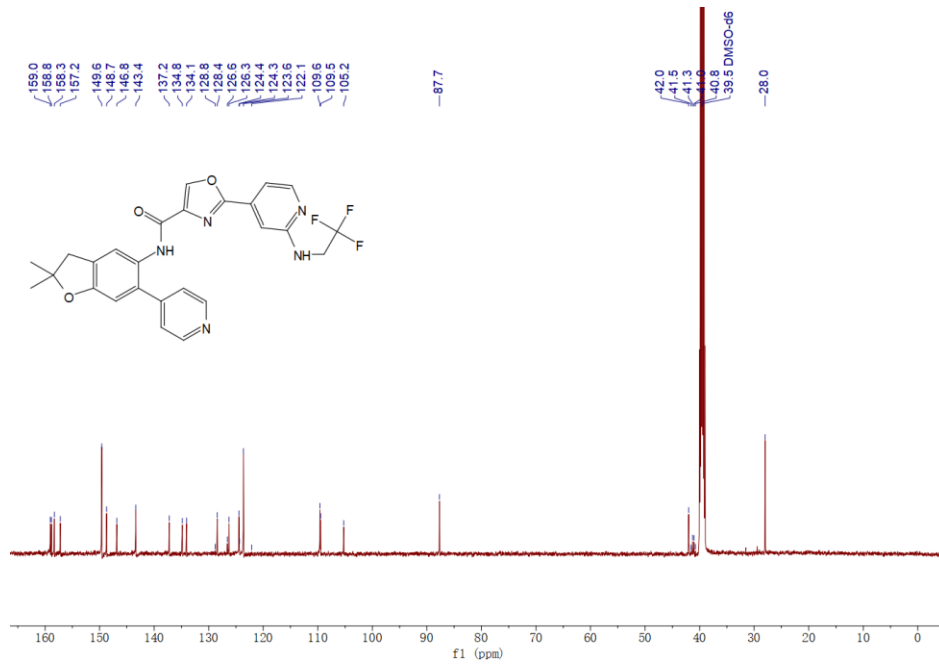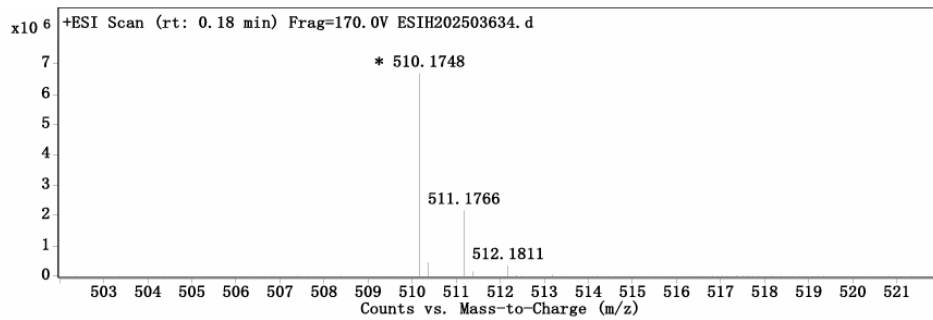

*N*-(2,2-dimethyl-6-(pyridin-4-yl)-2,3-dihydrobenzofuran-5-yl)-2-(1*H*-pyrazol-4-yl)oxazole-4-carboxamide (**4**)

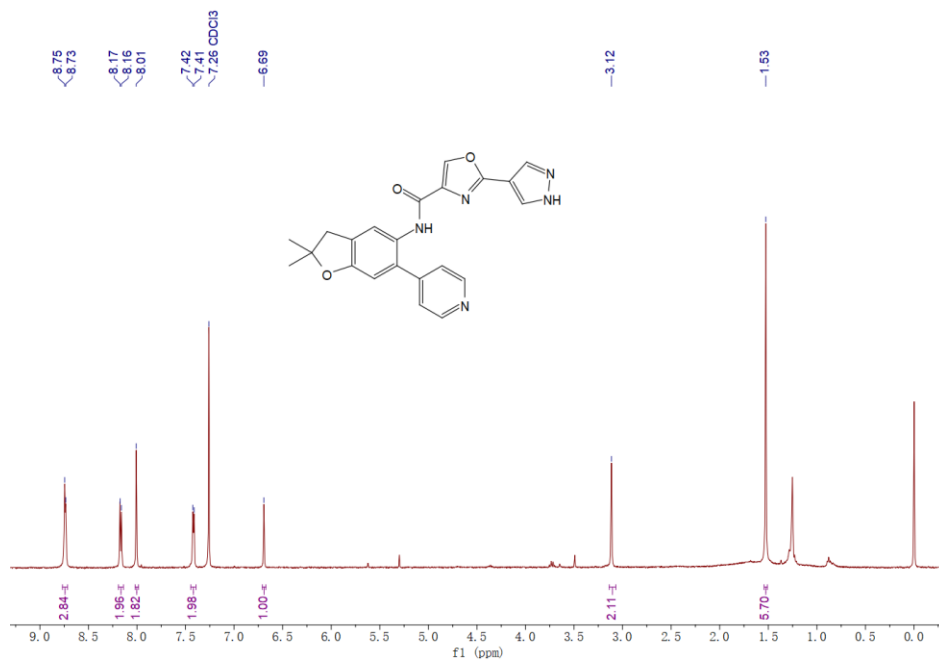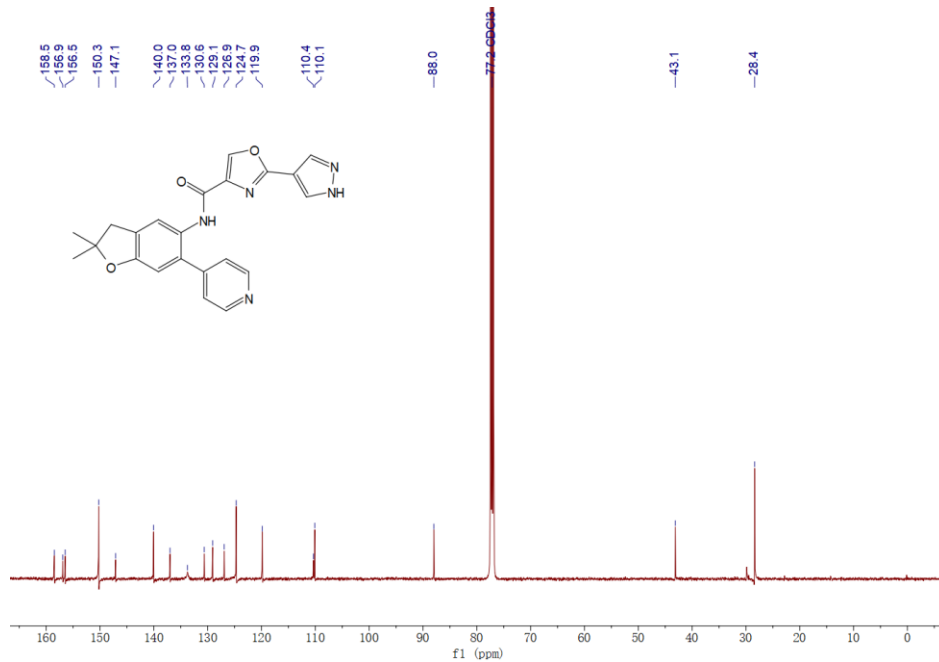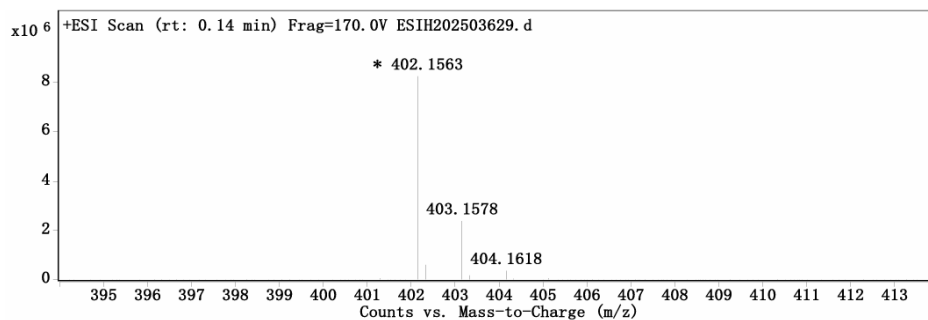

*N*-(2,2-dimethyl-6-(pyridin-4-yl)-2,3-dihydrobenzofuran-5-yl)-2-(3-sulfamoylphenyl)oxazole-4-carboxamide (**5**)

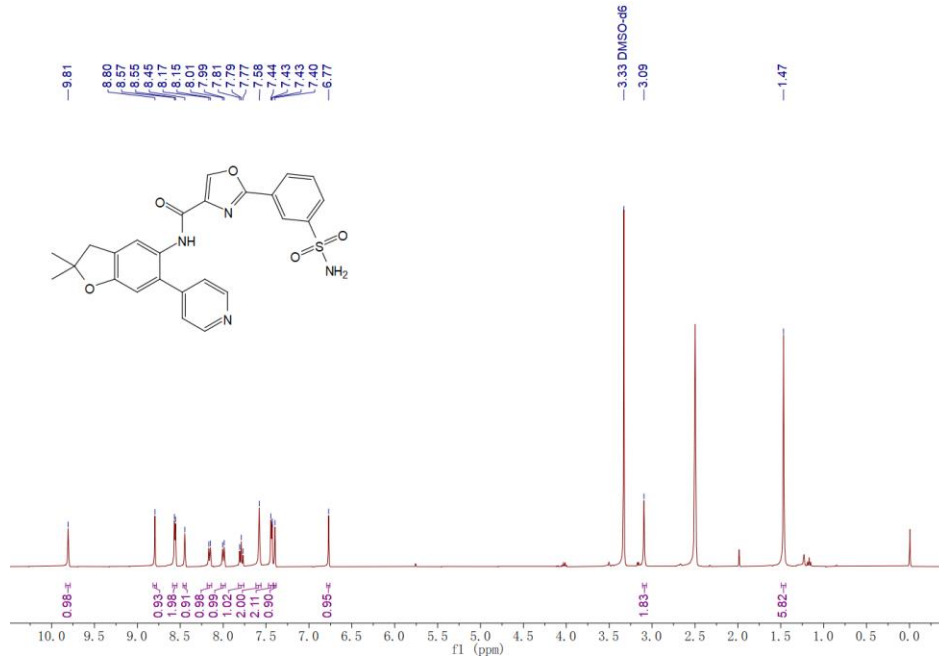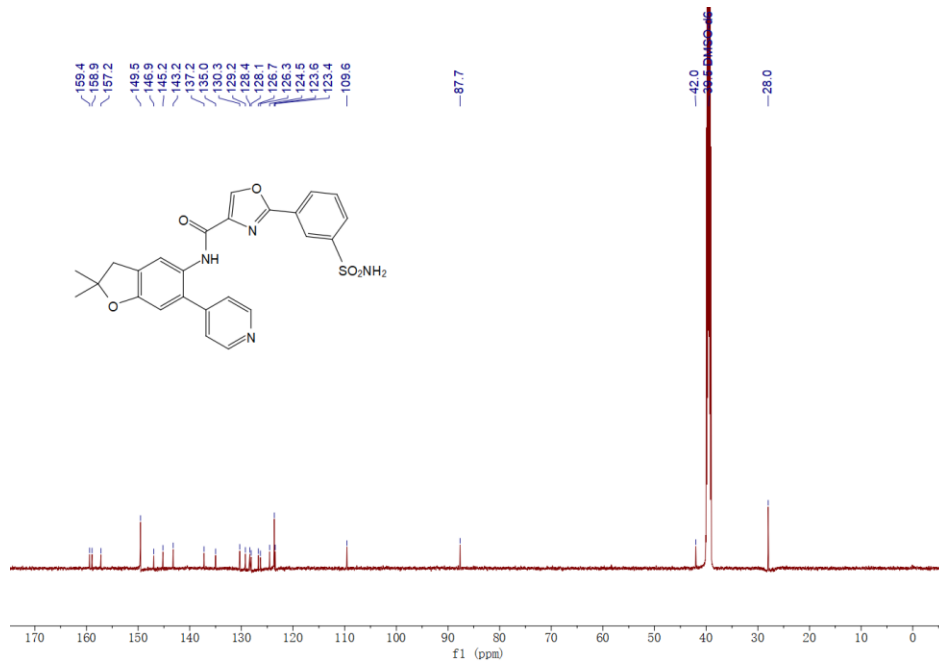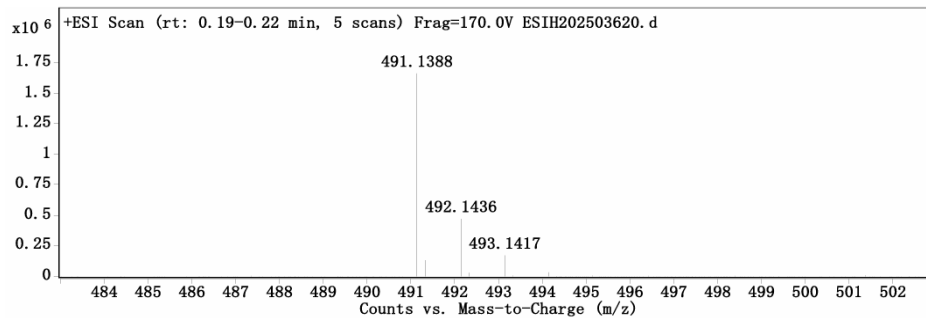

*N*-(2,2-dimethyl-6-(pyridin-4-yl)-2,3-dihydrobenzofuran-5-yl)-2-(6-oxo-1,6-dihydropyridin-3-yl)oxazole-4-carboxamide (**6**)

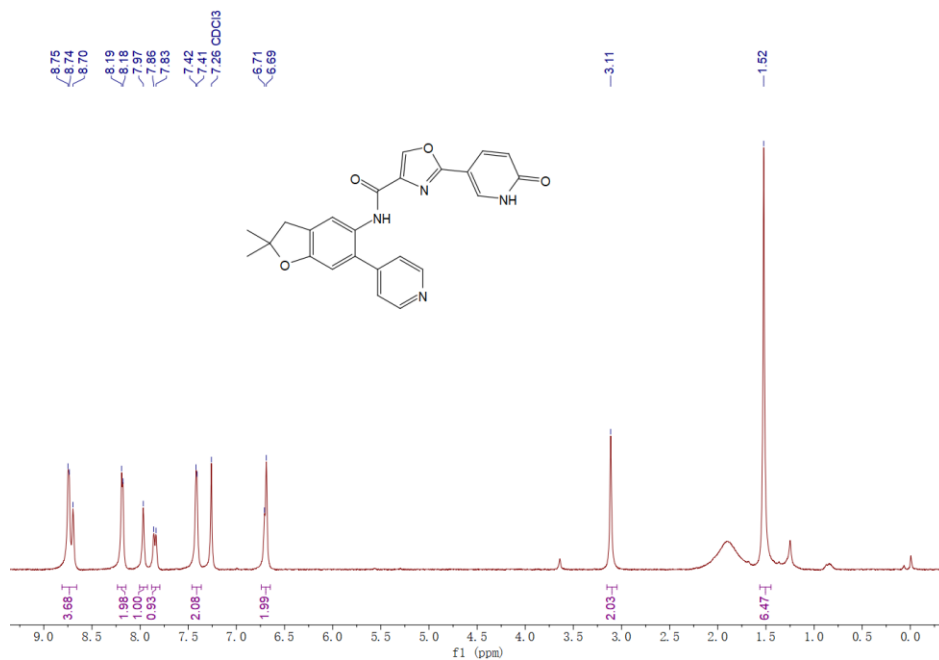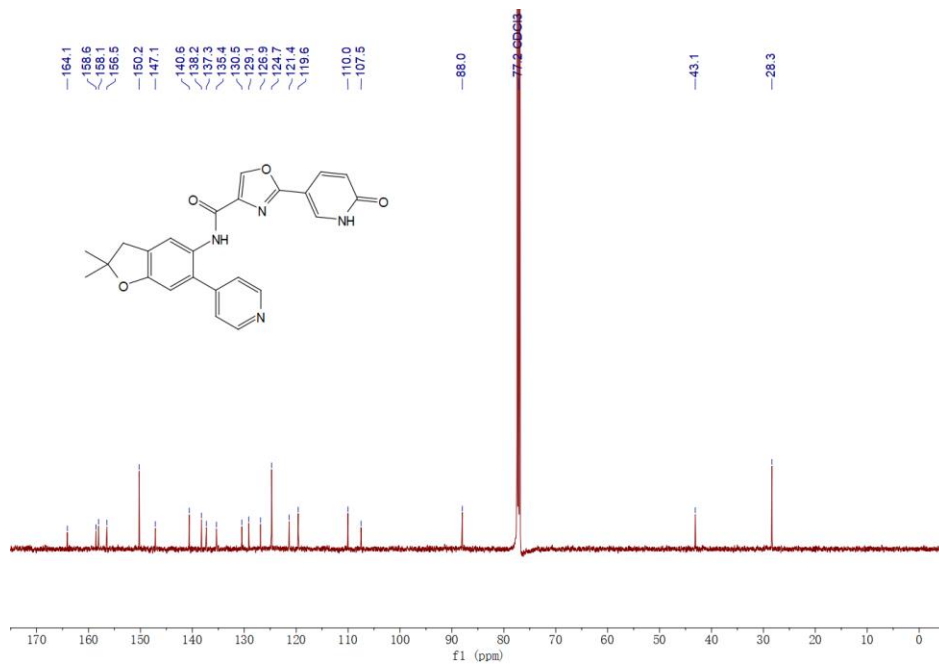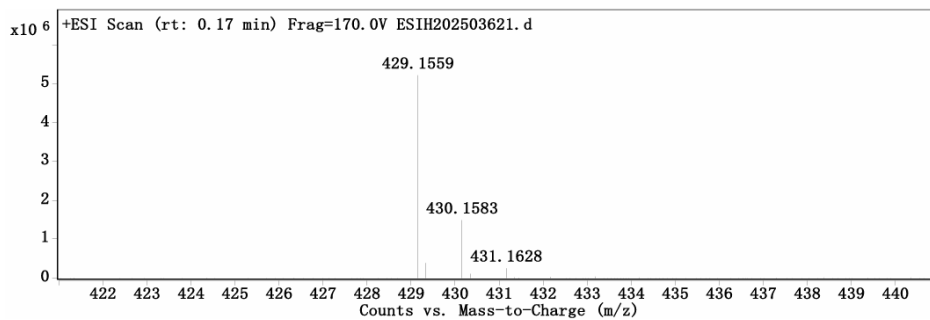

*N*-(2,2-dimethyl-6-(pyridin-4-yl)-2,3-dihydrobenzofuran-5-yl)-2-(1*H*-pyrrolo[2,3-*b*]pyridin-4-yl)oxazole-4-carboxamide (**7**)

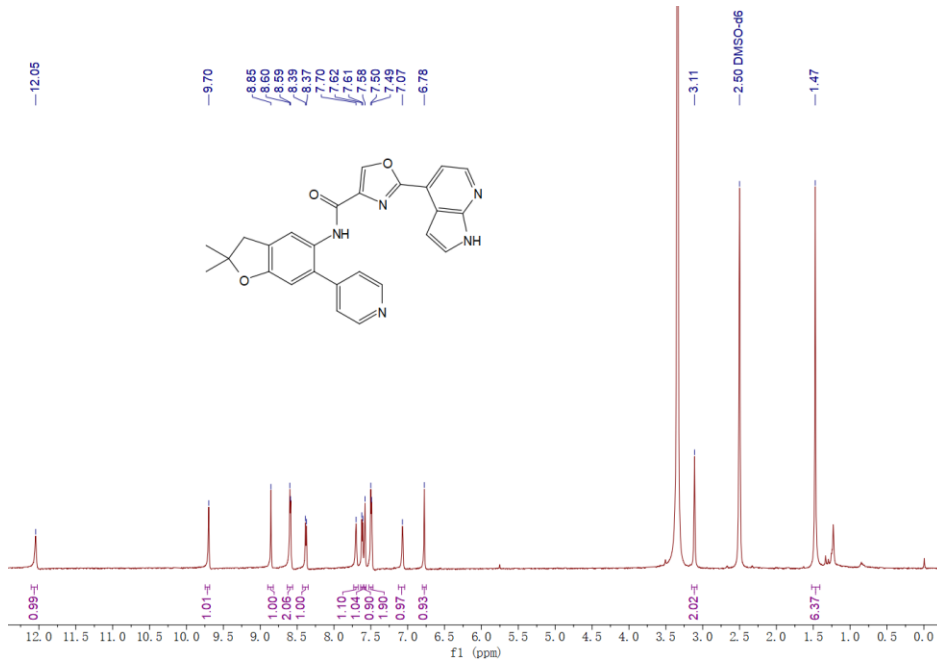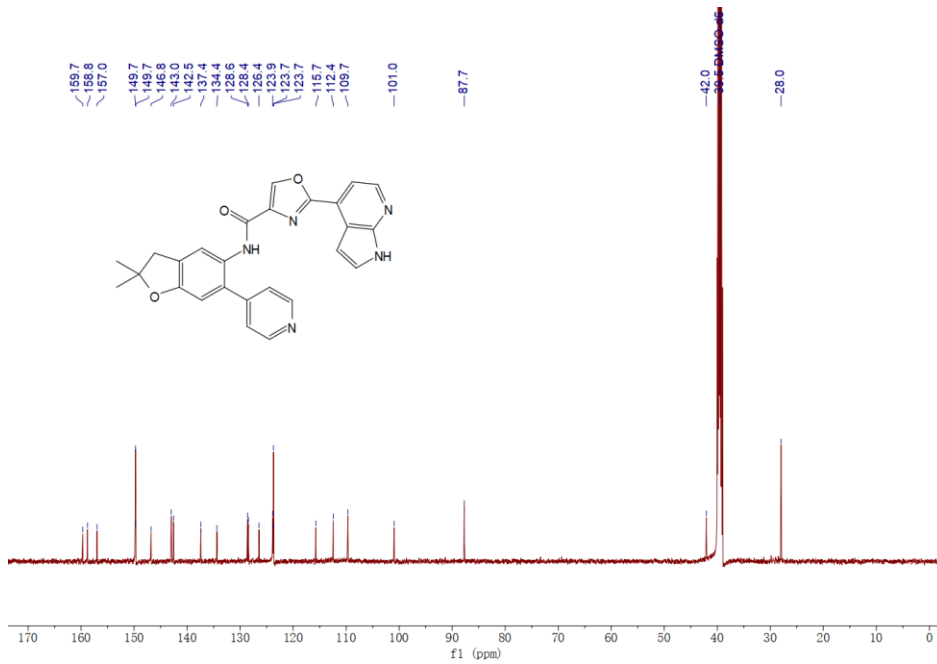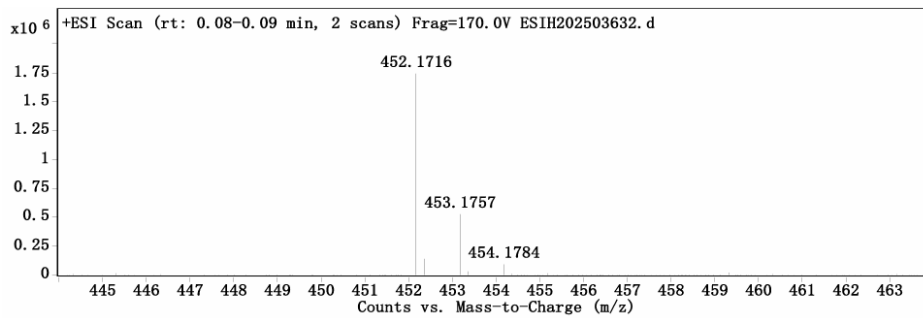

2-(2-aminopyridin-4-yl)-*N*-(3,3-difluoro-2,2-dimethyl-6-(pyridin-4-yl)-2,3-dihydrobenzofuran-5-yl)oxazole-4-carboxamide (**8**)

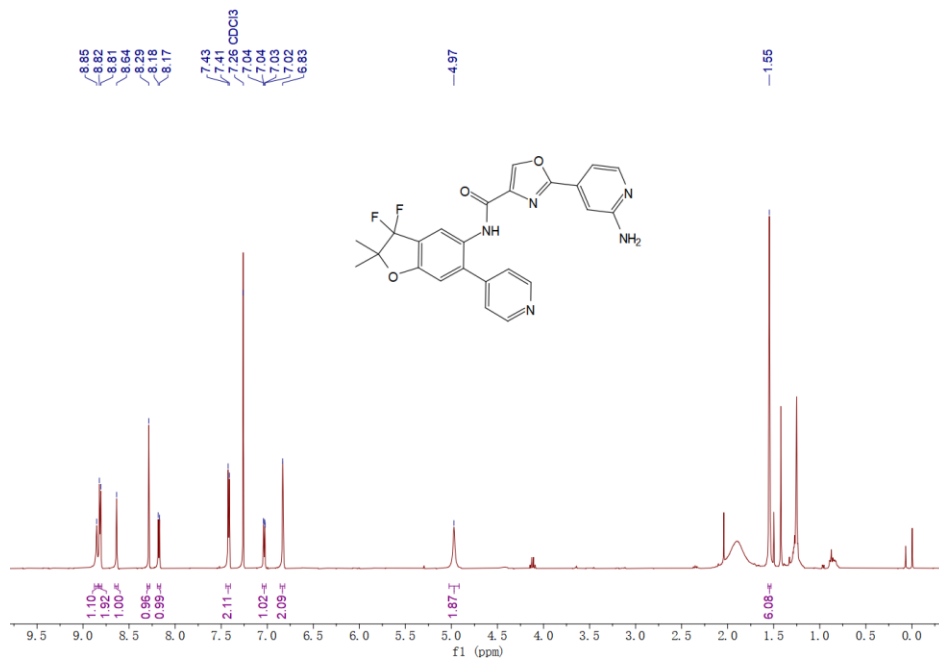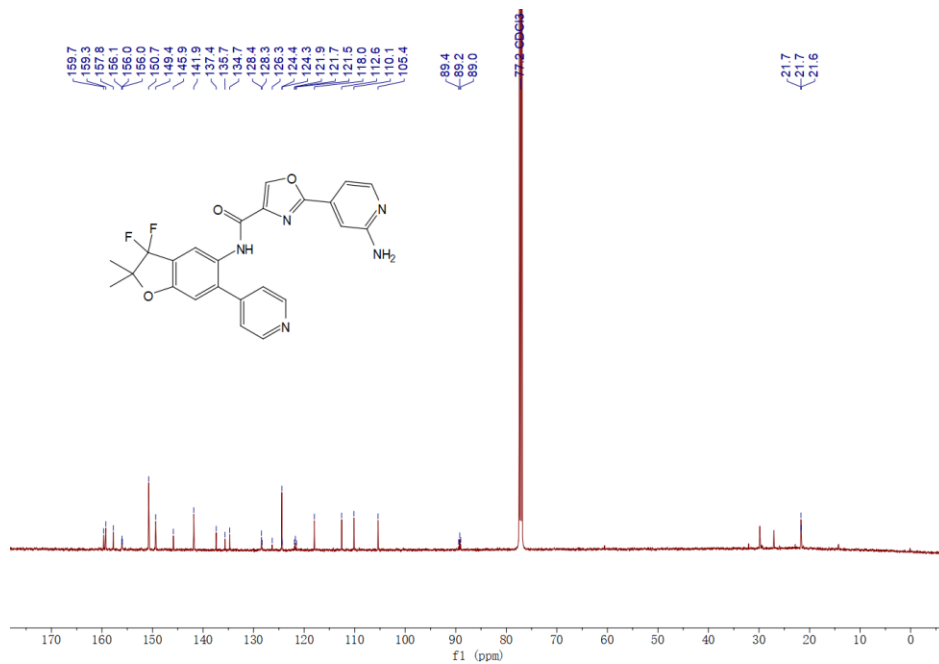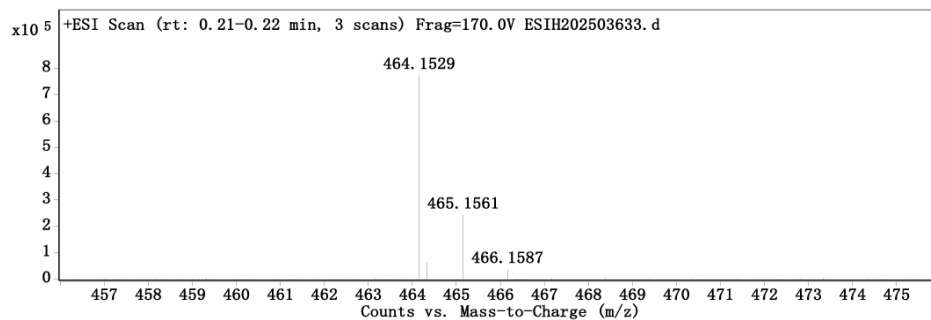

2-(2-aminopyridin-4-yl)-*N*-(6-(pyridin-4-yl)-3*H*-spiro[benzofuran-2,4'-piperidin]-5-yl)oxazole-4-carboxamide (**9**)

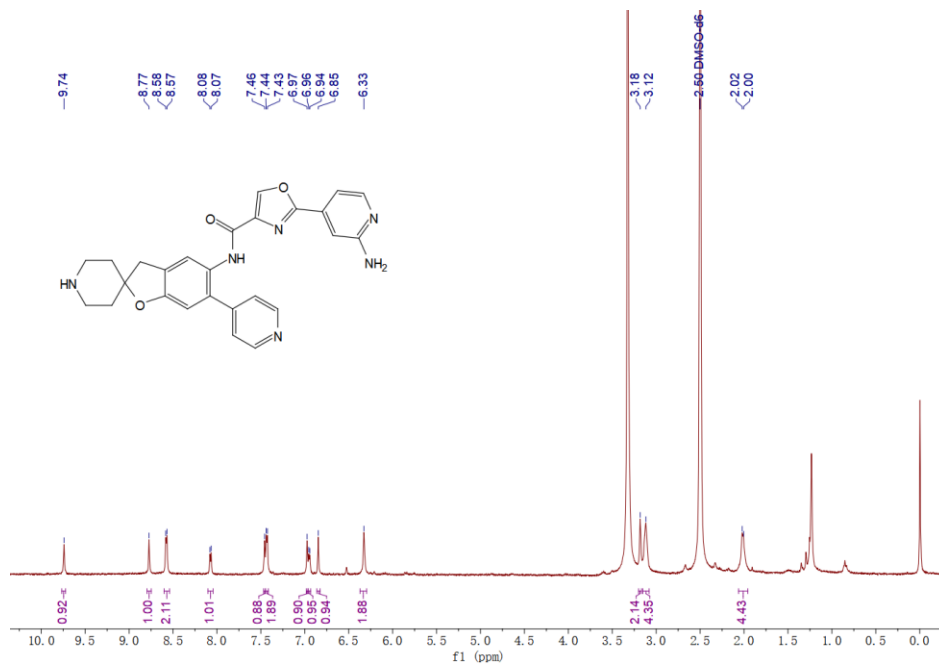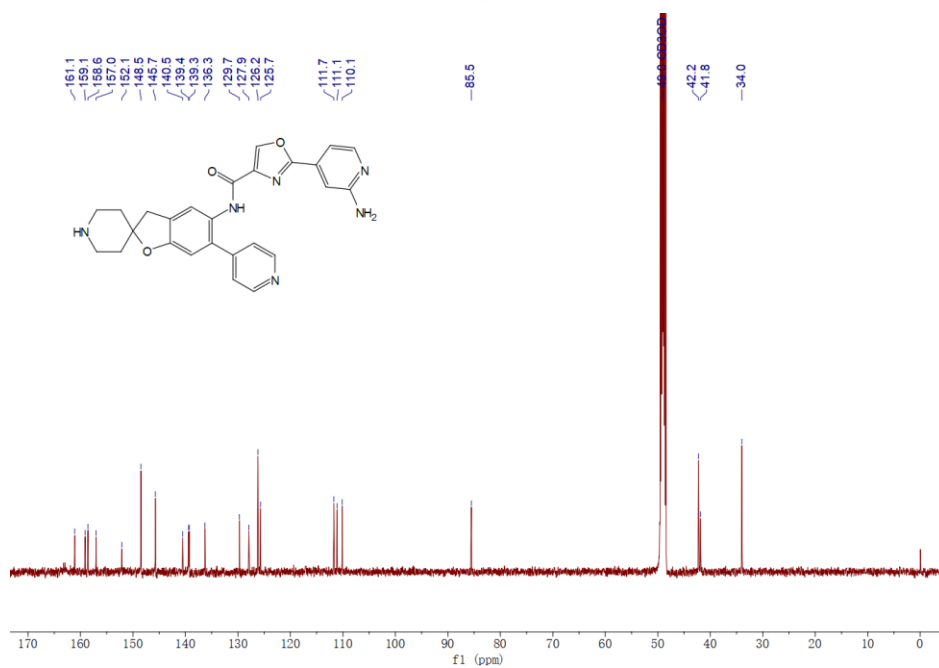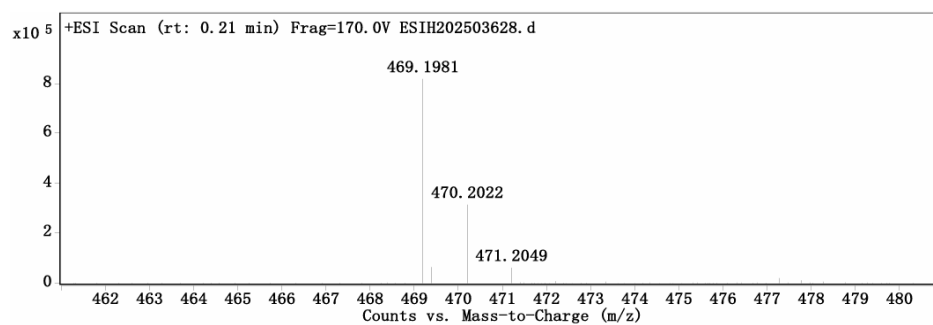

2-(2-aminopyridin-4-yl)-*N*-(1'-methyl-6-(pyridin-4-yl)-3*H*-spiro[benzofuran-2,4'-piperidin]-5-yl)oxazole-4-carboxamide (**10**)

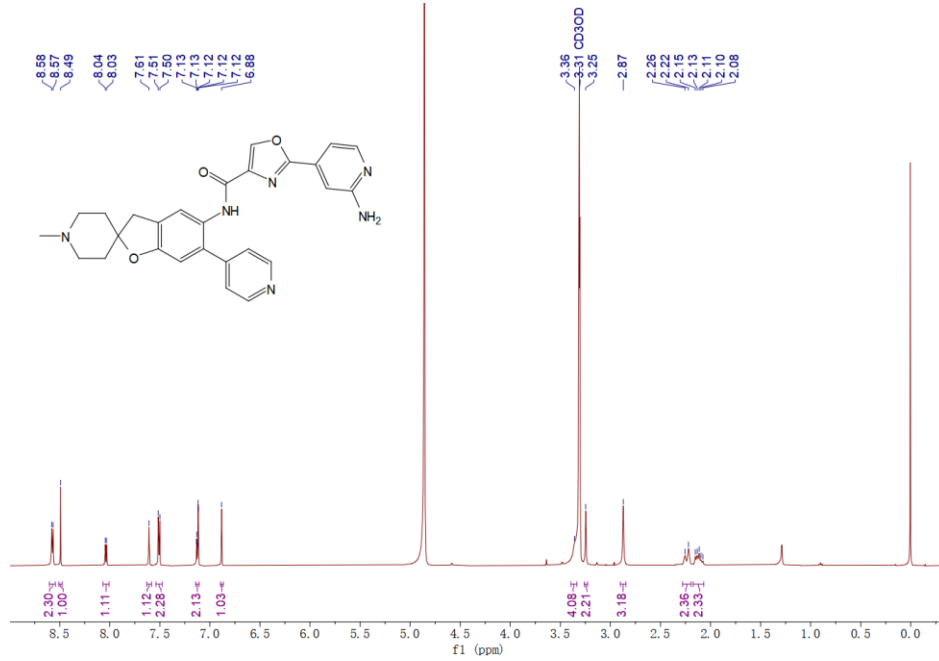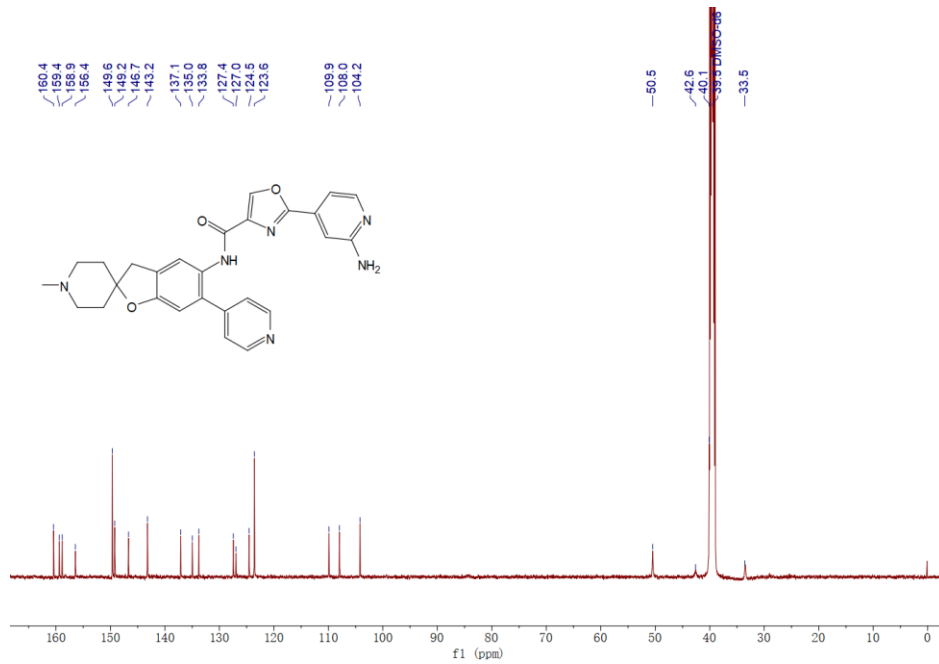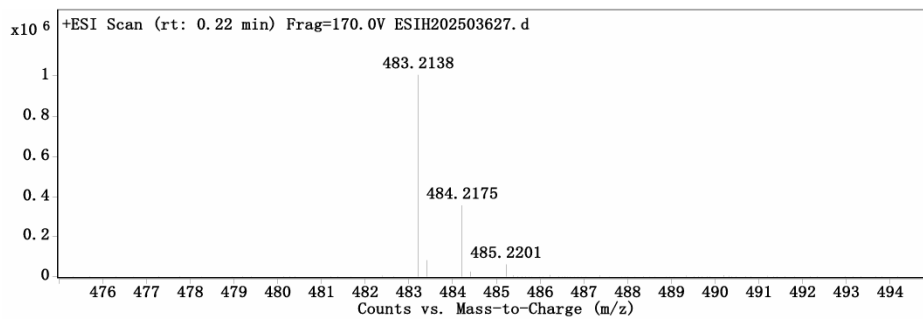

2-(2-aminopyridin-4-yl)-*N*-(1-(2,2-difluoroethyl)-6-(pyridin-4-yl)-3*H*-spiro[benzofuran-2,4'-piperidin]-5-yl)oxazole-4-carboxamide (**11**)

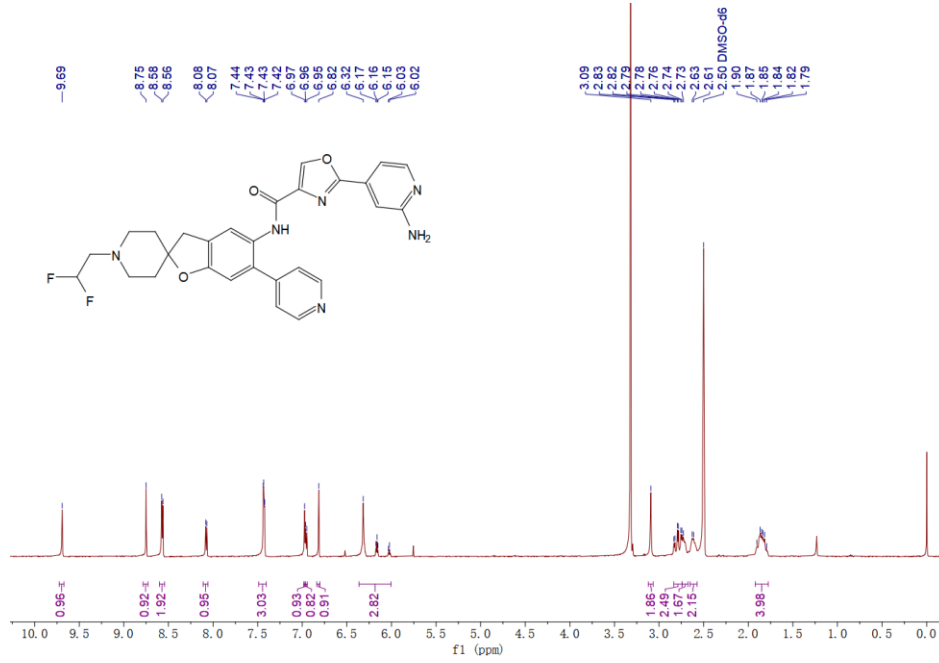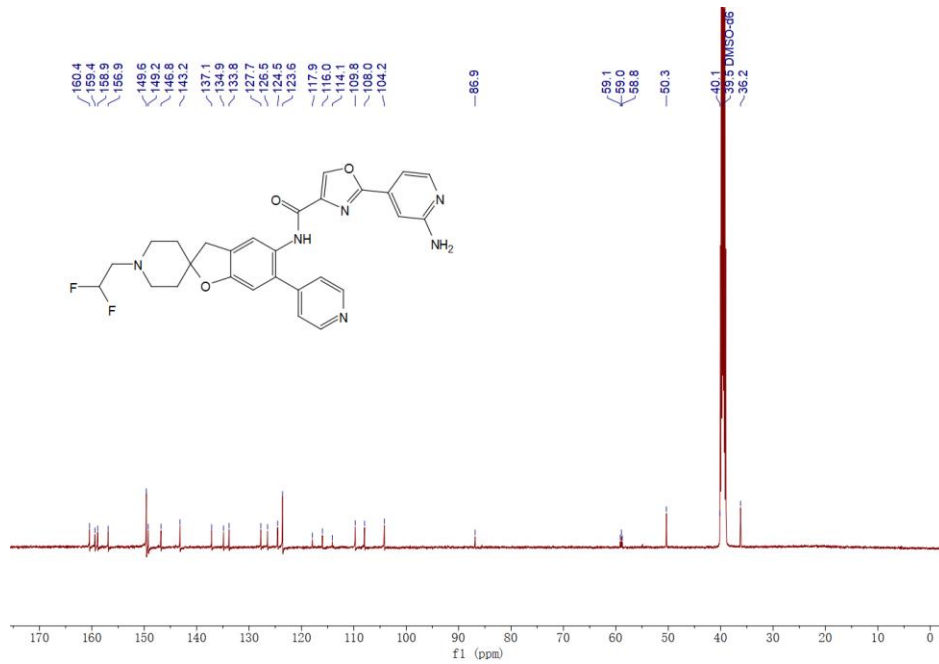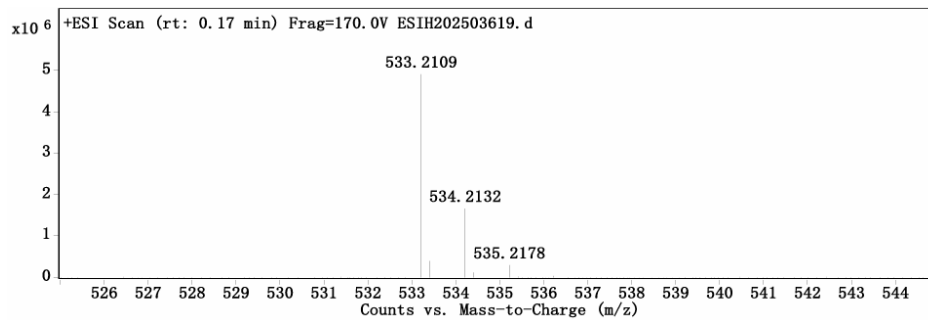

2-(2-aminopyridin-4-yl)-*N*-(6-(pyridin-4-yl)-1'-(2,2,2-trifluoroethyl)-3*H*-spiro[benzofuran-2,4'-piperidin]-5-yl)oxazole-4-carboxamide (**12**)

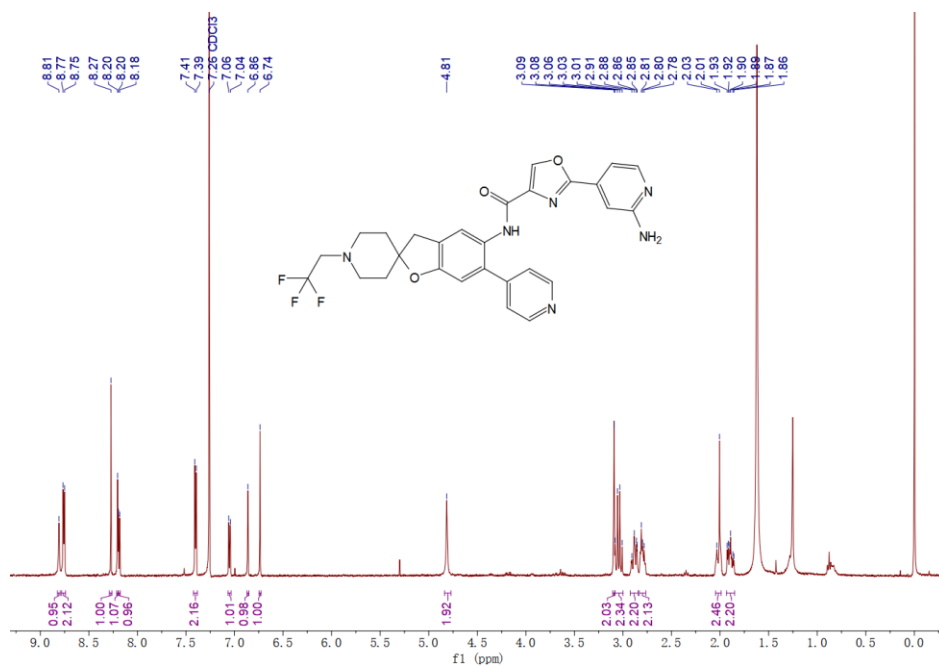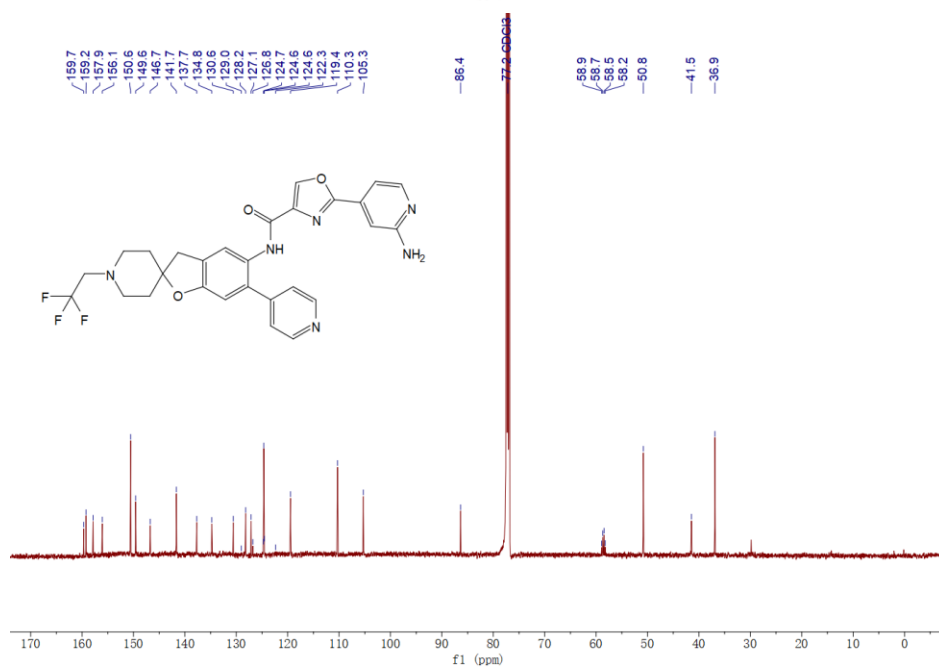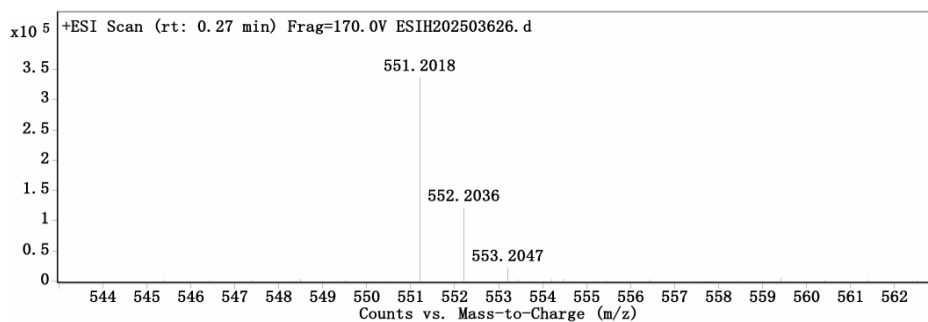

*N*-(1'-acetyl-6-(pyridin-4-yl)-3*H*-spiro[benzofuran-2,4'-piperidin]-5-yl)-2-(2-aminopyridin-4-yl)oxazole-4-carboxamide (**13**)

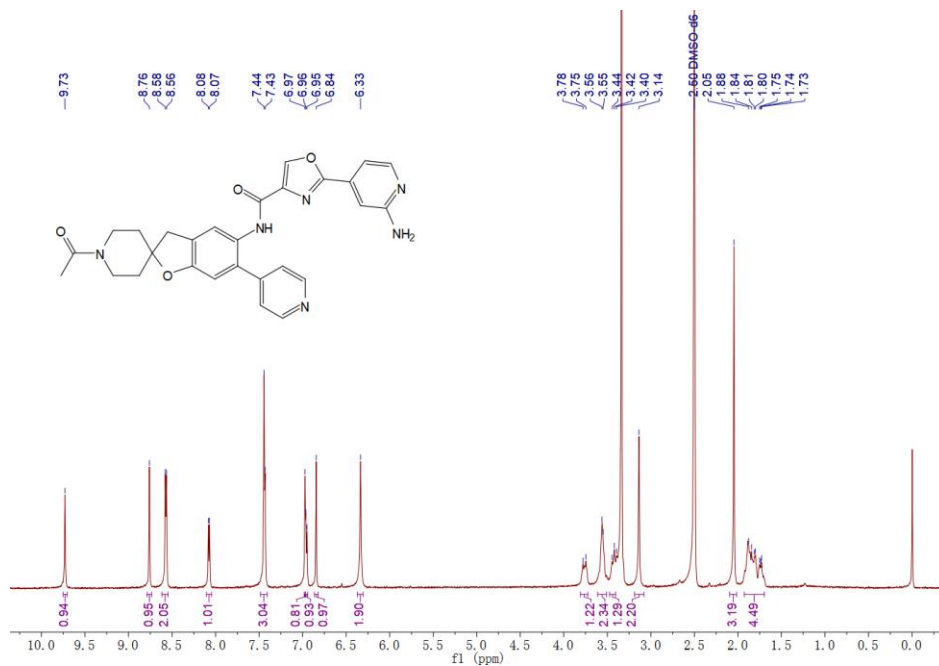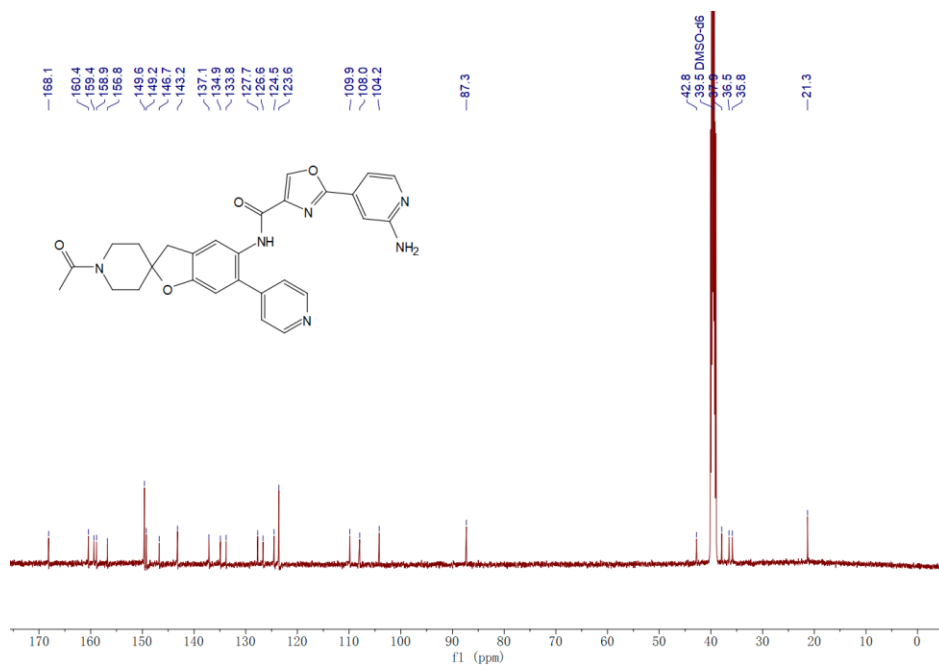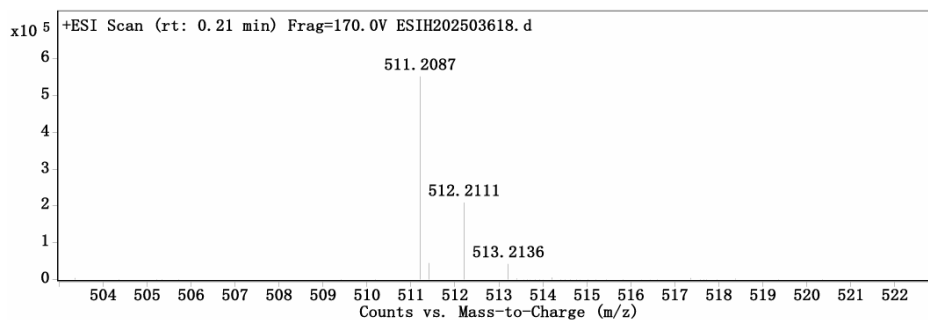



2-(2-aminopyridin-4-yl)-*N*-(1'-butyryl-6-(pyridin-4-yl)-3*H*-spiro[benzofuran-2,4'-piperidin]-5-yl)oxazole-4-carboxamide (**15**)

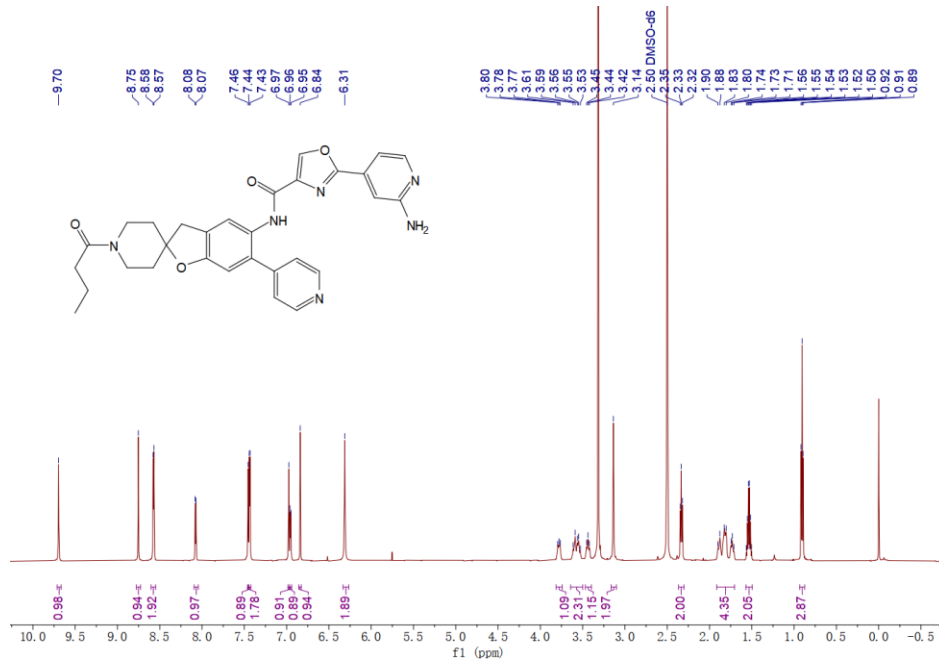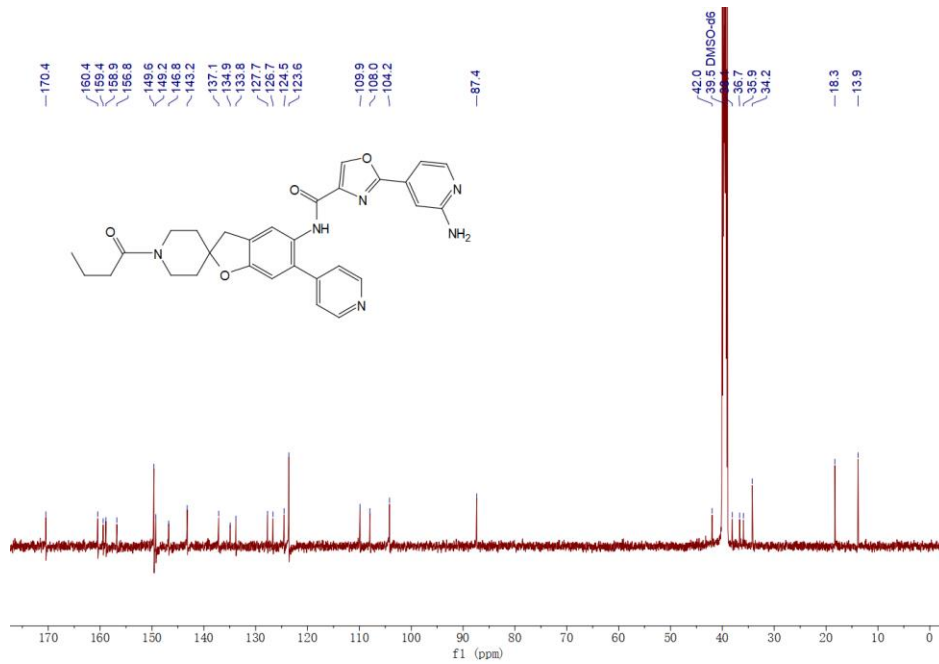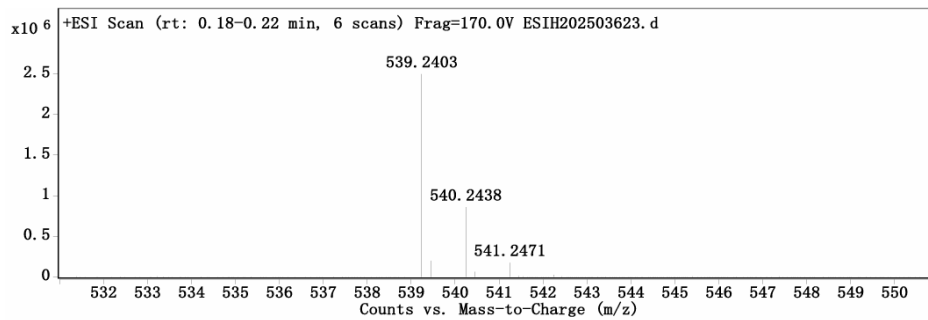

2-(2-aminopyridin-4-yl)-*N*-(1'-(2-hydroxyacetyl)-6-(pyridin-4-yl)-3*H*-spiro[benzofuran-2,4'-piperidin]-5-yl)oxazole-4-carboxamide (**16**)

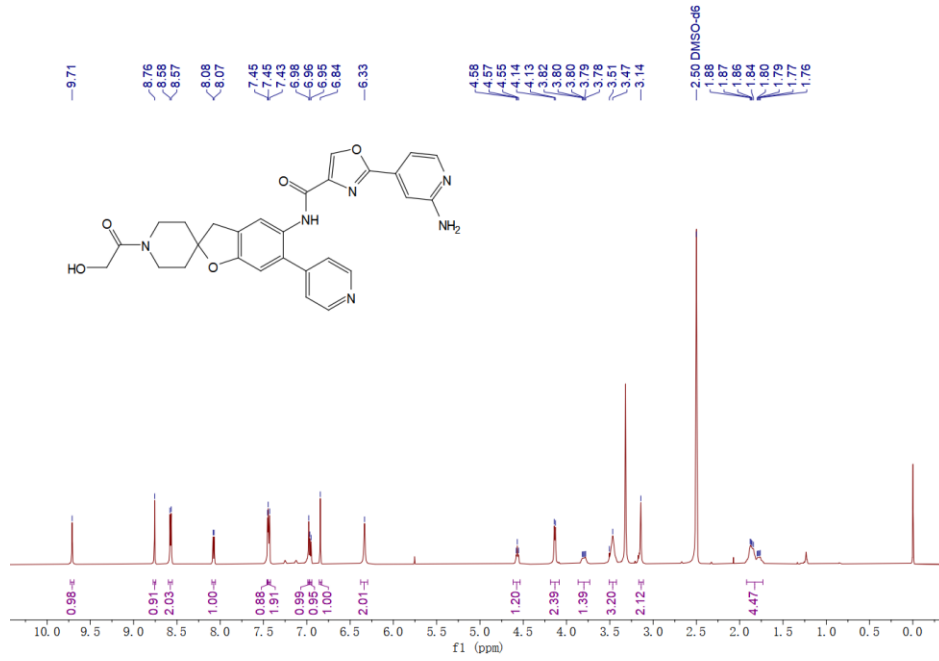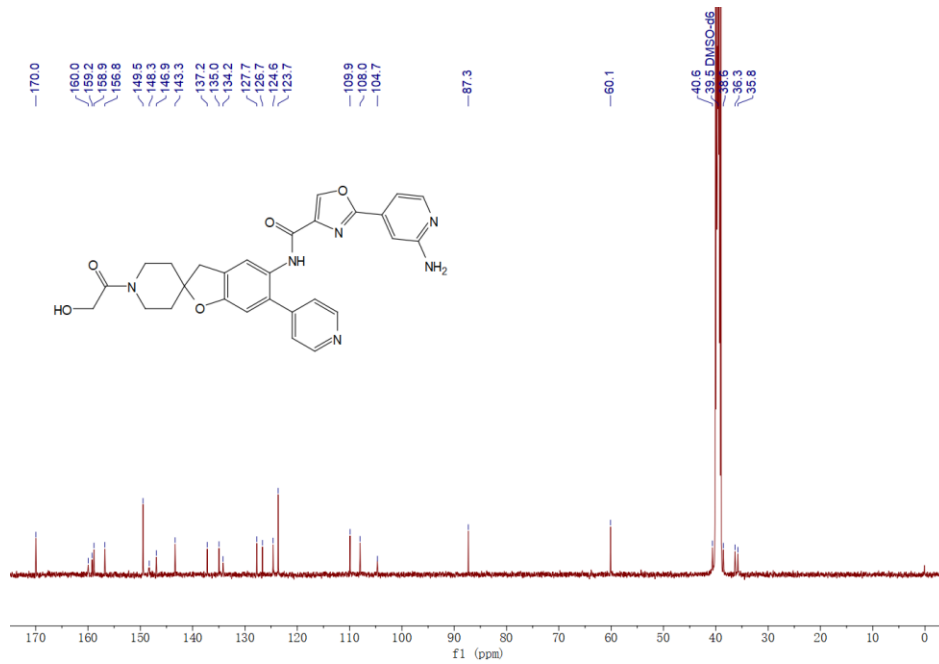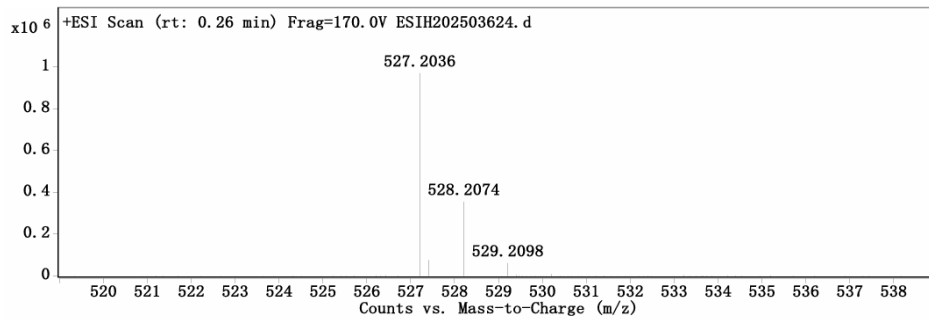

2-(2-aminopyridin-4-yl)-*N*-(6-(pyridin-4-yl)-1'-(thiazol-2-yl)-3*H*-spiro[benzofuran-2,4'-piperidin]-5-yl)oxazole-4-carboxamide (17)

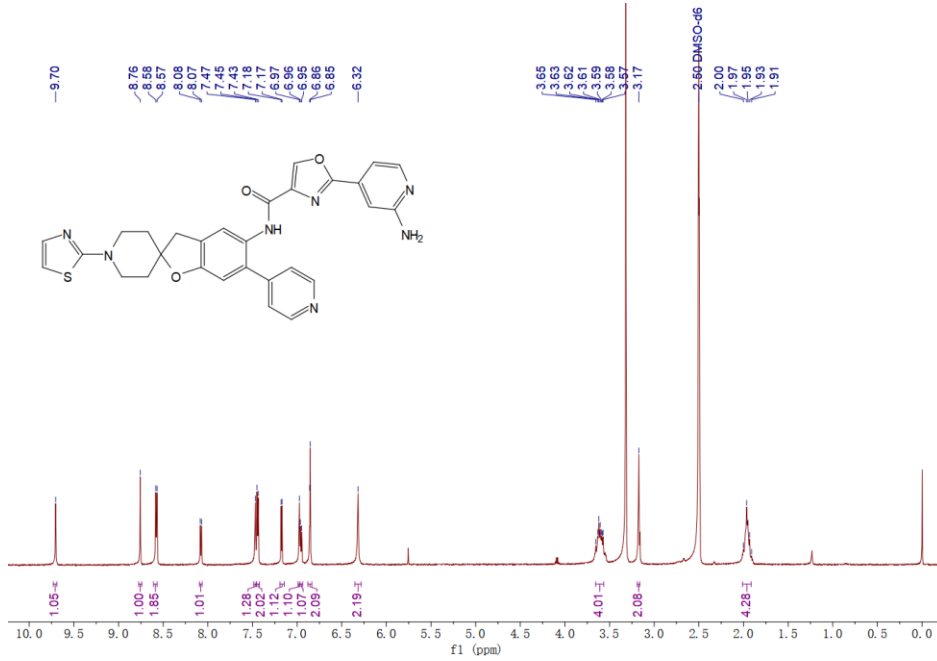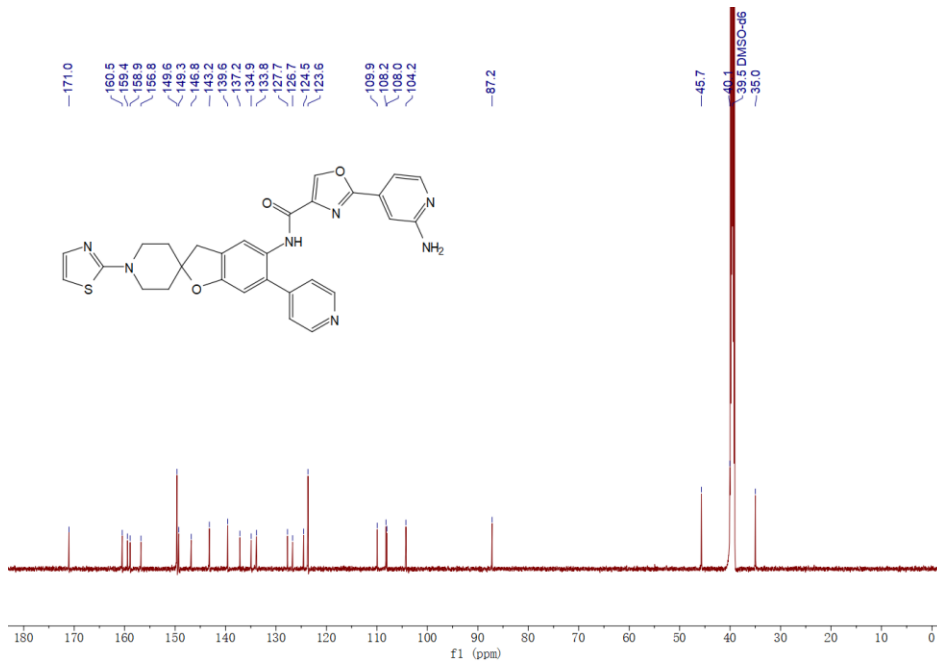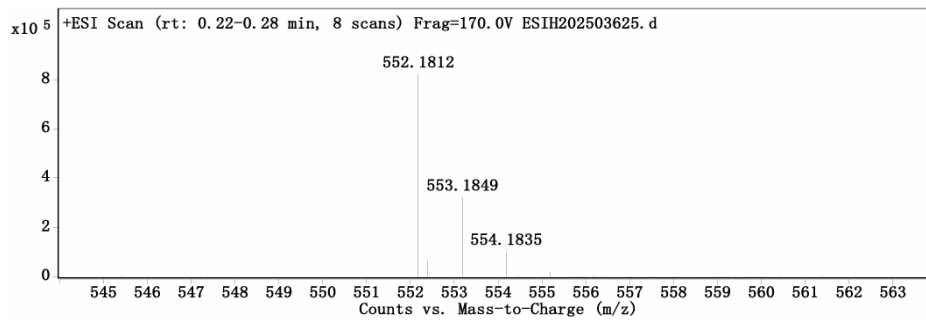

*N*-(1'-acetyl-6-(furan-3-yl)-3*H*-spiro[benzofuran-2,4'-piperidin]-5-yl)-2-(2-aminopyridin-4-yl)oxazole-4-carboxamide (**18**)

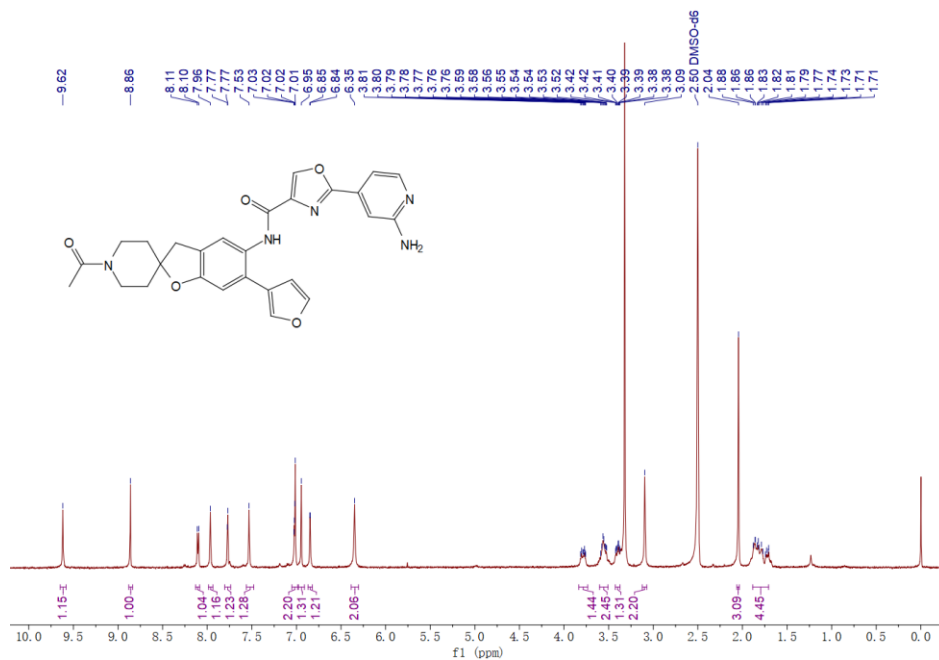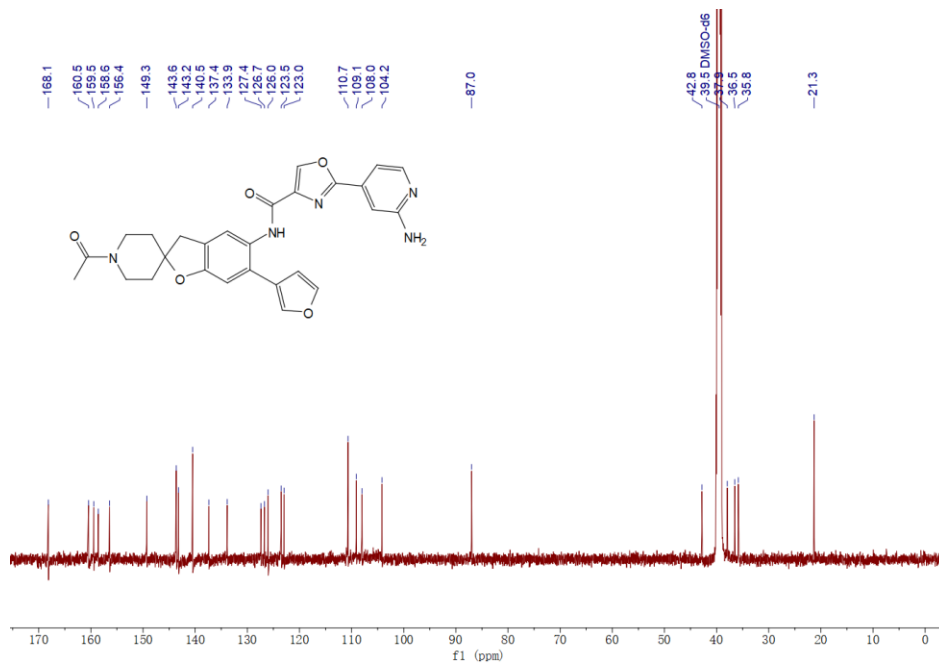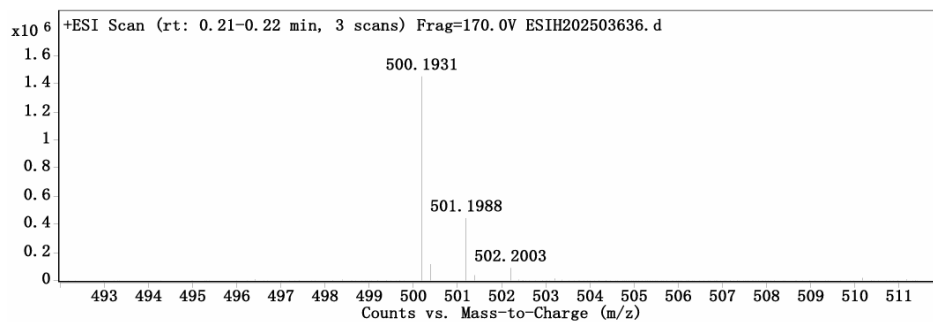

*N*-(1'-acetyl-6-(thiophen-3-yl)-3*H*-spiro[benzofuran-2,4'-piperidin]-5-yl)-2-(2-aminopyridin-4-yl)oxazole-4-carboxamide (**19**)

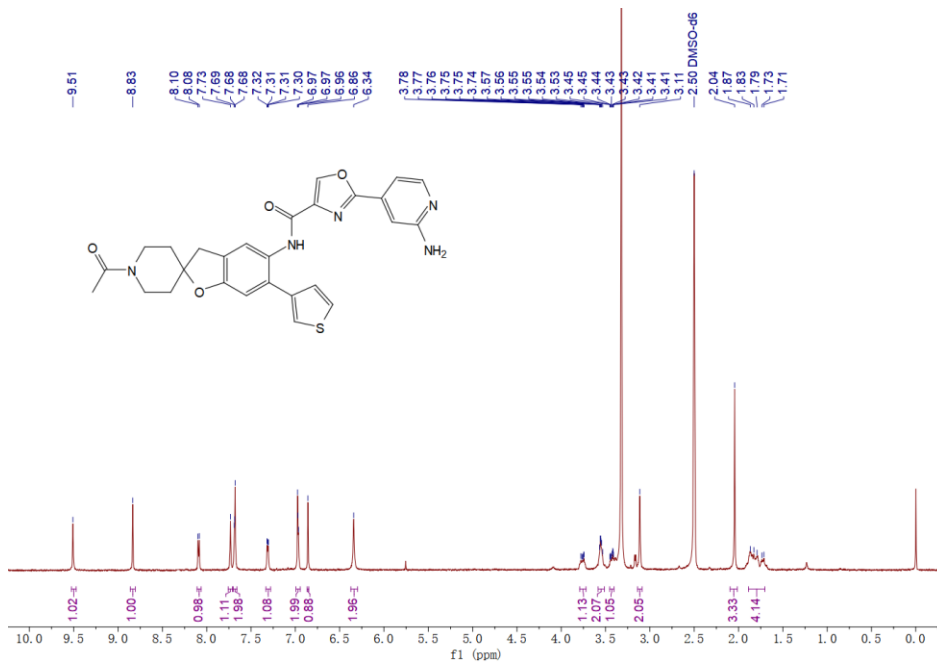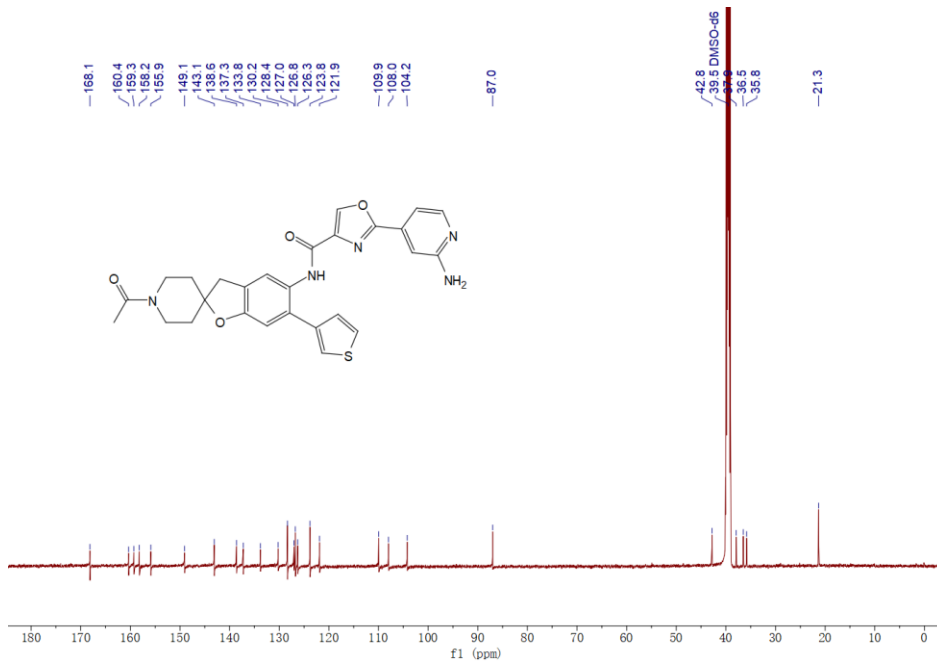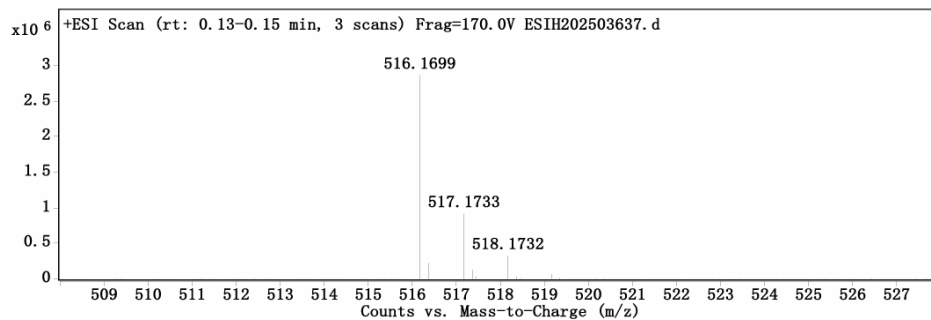

*N*-(1'-acetyl-6-(1-methyl-1*H*-pyrazol-4-yl)-3*H*-spiro[benzofuran-2,4'-piperidin]-5-yl)-2-(2-aminopyridin-4-yl)oxazole-4-carboxamide (**20**)

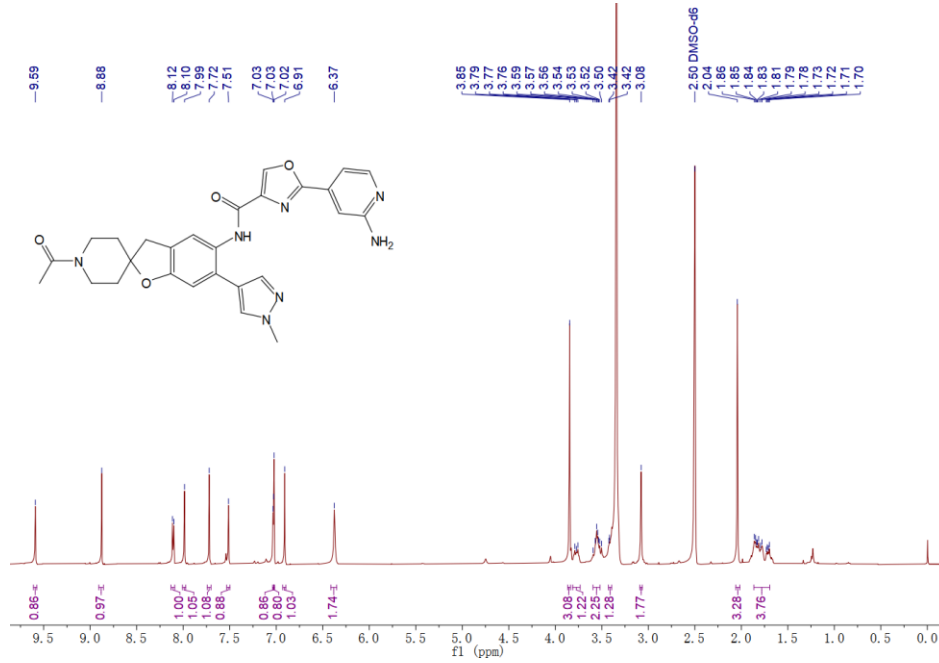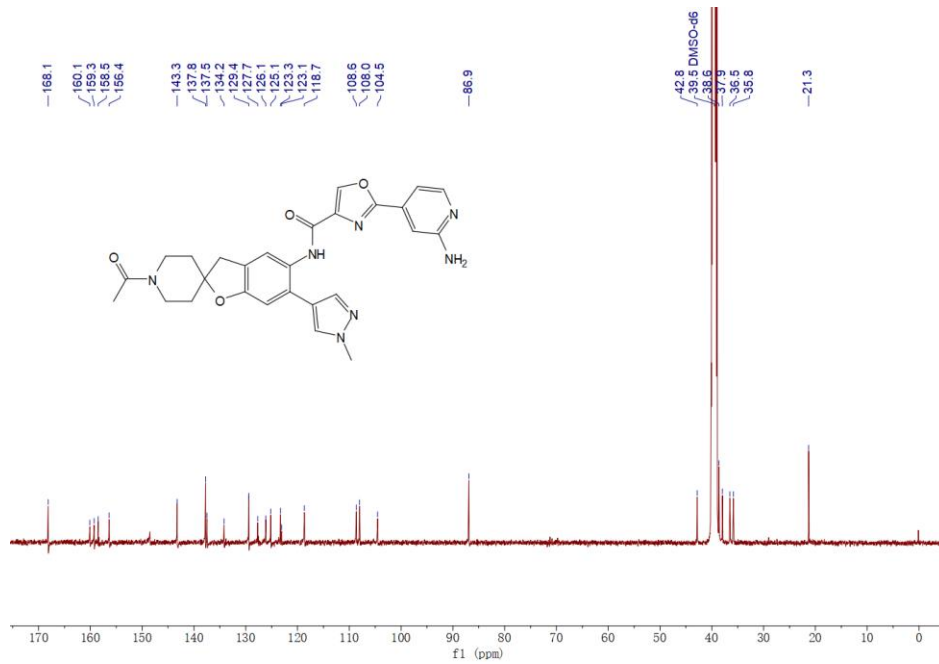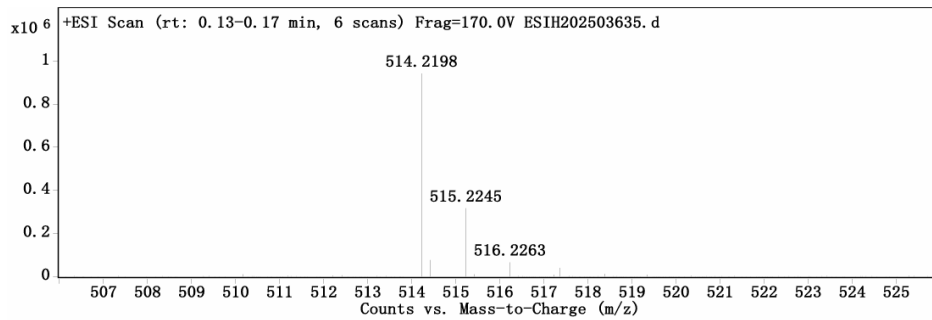

*N*-(1'-acetyl-6-(4-fluorophenyl)-3*H*-spiro[benzofuran-2,4'-piperidin]-5-yl)-2-(2-amino pyridin-4-yl)oxazole-4-carboxamide (**21**)

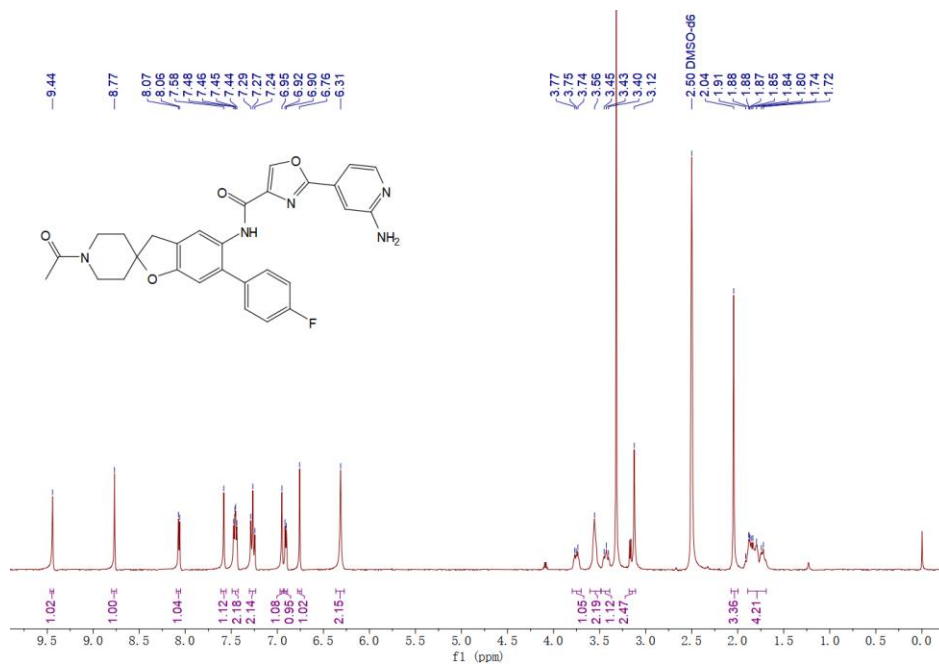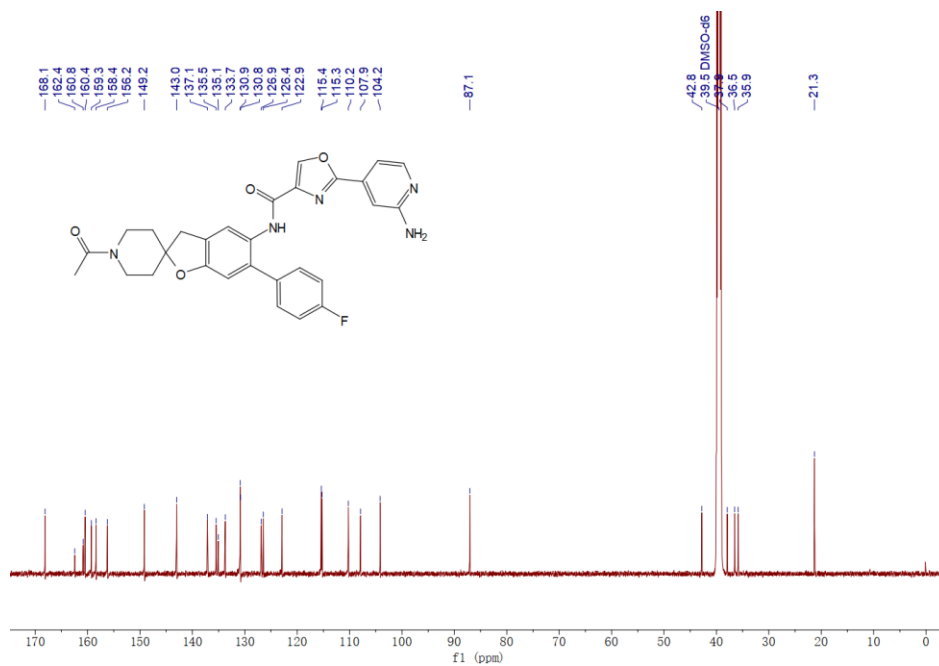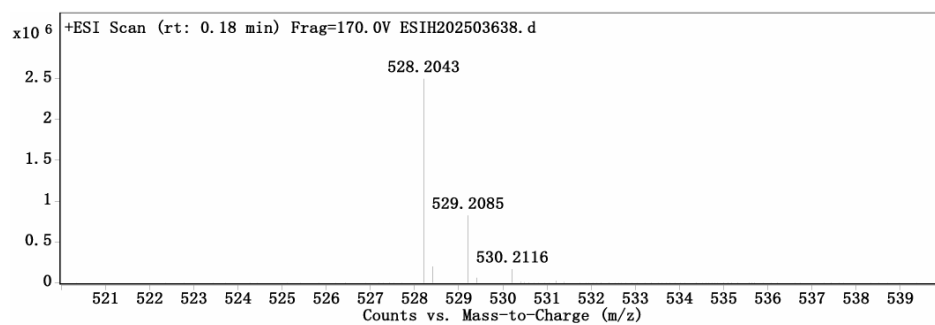

### HPLC determination of target compounds 1–21 and DW18134.

**General method for HPLC analysis:** HPLC analysis was conducted according to different eluents. The retention time ( $t_R$ ) is expressed in min at UV detection of 254 nM. HPLC analysis was performed on an Agilent Eclipse Plus column (4.6 × 150 mm, 5 μm) at 35 °C. Flow rate: 1.0 mL/min.

| Compound | Retention Time (Min) | Purity (%) |
|----------|----------------------|------------|
| 1        | 4.978 <sup>a</sup>   | 99.95      |
| 2        | 7.908 <sup>a</sup>   | 99.89      |
| 3        | 7.998 <sup>f</sup>   | 99.47      |
| 4        | 6.256 <sup>c</sup>   | 99.94      |
| 5        | 6.396 <sup>h</sup>   | 99.53      |
| 6        | 4.944 <sup>e</sup>   | 99.10      |
| 7        | 6.615 <sup>f</sup>   | 97.44      |
| 8        | 5.328 <sup>f</sup>   | 98.83      |
| 9        | 6.728 <sup>a</sup>   | 99.87      |
| 10       | 5.696 <sup>b</sup>   | 99.62      |
| 11       | 8.581 <sup>h</sup>   | 99.99      |
| 12       | 5.265 <sup>a</sup>   | 98.91      |
| 13       | 5.183 <sup>d</sup>   | 99.45      |
| 14       | 9.200 <sup>i</sup>   | 98.35      |
| 15       | 8.010 <sup>h</sup>   | 98.26      |
| 16       | 8.026 <sup>h</sup>   | 98.55      |
| 17       | 4.948 <sup>f</sup>   | 98.03      |
| 18       | 4.931 <sup>g</sup>   | 97.95      |
| 19       | 7.261 <sup>g</sup>   | 98.43      |
| 20       | 5.408 <sup>d</sup>   | 96.19      |
| 21       | 8.492 <sup>g</sup>   | 99.43      |
| DW18134  | 7.196 <sup>h</sup>   | 99.87      |

<sup>a</sup> CH<sub>3</sub>OH/H<sub>2</sub>O (0.1% TEA) = 70/30 (v/v);

<sup>b</sup> CH<sub>3</sub>OH/H<sub>2</sub>O (0.1% TEA) = 65/35 (v/v);

<sup>c</sup> CH<sub>3</sub>OH/H<sub>2</sub>O (0.1% TEA) = 60/40 (v/v);

<sup>d</sup> CH<sub>3</sub>OH/H<sub>2</sub>O (0.1% TEA) = 55/45 (v/v);

<sup>e</sup> CH<sub>3</sub>OH/H<sub>2</sub>O (0.1% TFA) = 45/55 (v/v);

<sup>f</sup> CH<sub>3</sub>OH/H<sub>2</sub>O = 70/30 (v/v);

<sup>g</sup> CH<sub>3</sub>OH/H<sub>2</sub>O = 65/35 (v/v);

<sup>h</sup> CH<sub>3</sub>OH/H<sub>2</sub>O = 60/40 (v/v);

<sup>i</sup> CH<sub>3</sub>OH/H<sub>2</sub>O = 55/45 (v/v).

2-(2-(difluoromethyl)pyridin-4-yl)-*N*-(2,2-dimethyl-6-(pyridin-4-yl)-2,3-dihydrobenzofuran-5-yl)oxazole-4-carboxamide (**1**)

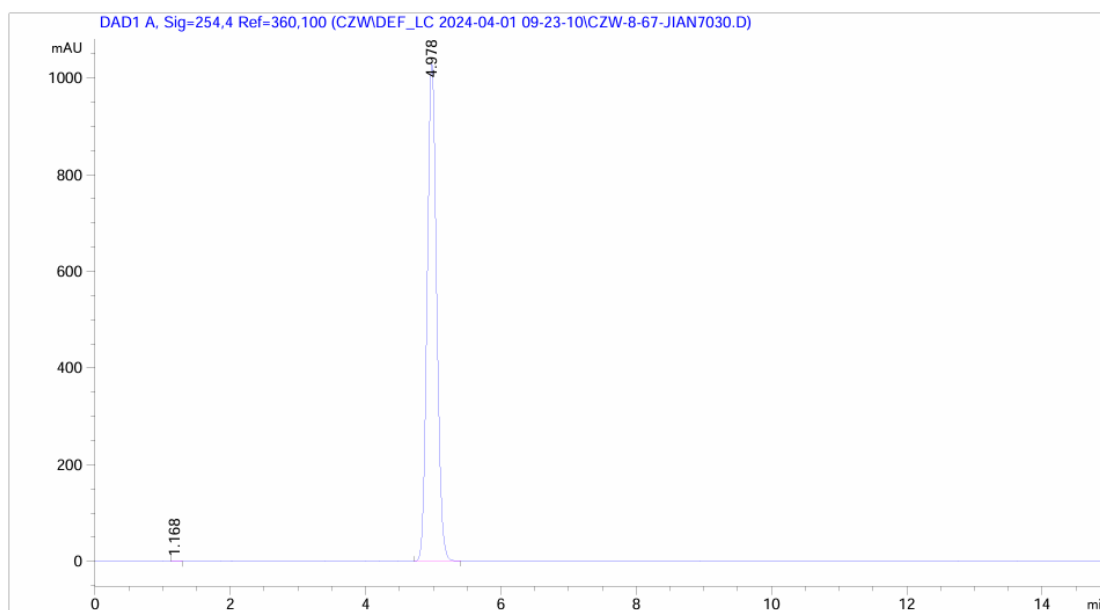

| Peak   | RetTime<br>[min] | Width<br>[min] | Area<br>[mAU*s] | Height<br>[mAU] | Area<br>(%) |
|--------|------------------|----------------|-----------------|-----------------|-------------|
| 1      | 1.168            | 0.0671         | 5.34346         | 1.17366         | 0.0533      |
| 2      | 4.978            | 0.1495         | 1.00150e4       | 1029.19836      | 99.9467     |
| Totals |                  |                | 1.00204e4       | 1030.37203      |             |

2-(2-(difluoromethoxy)pyridin-4-yl)-N-(2,2-dimethyl-6-(pyridin-4-yl)-2,3-dihydrobenzofuran-5-yl)oxazole-4-carboxamide (2)

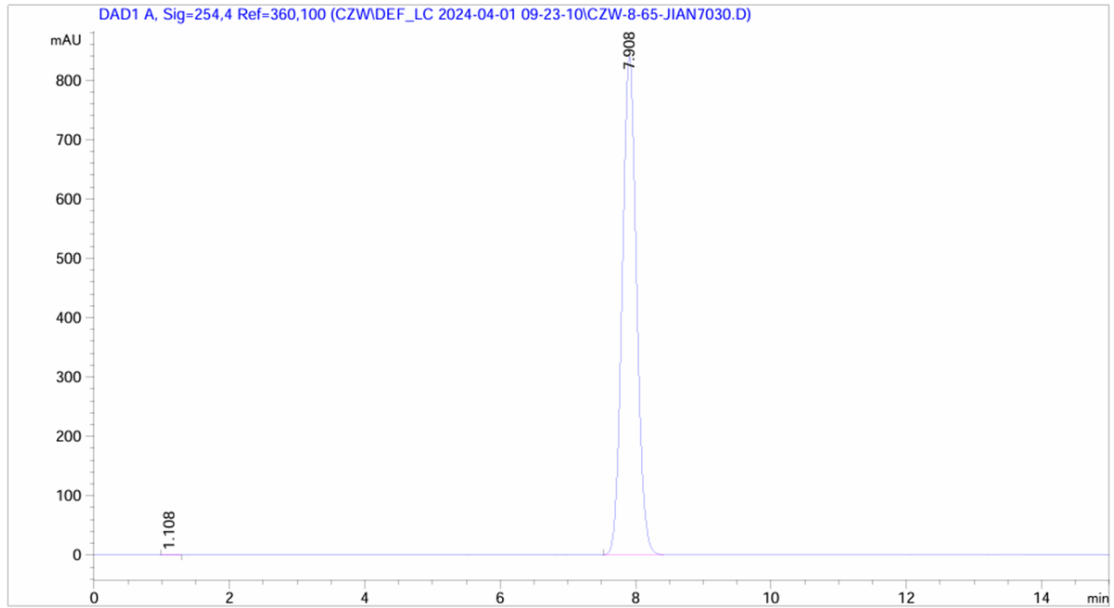

| Peak   | RetTime<br>[min] | Width<br>[min] | Area<br>[mAU*s] | Height<br>[mAU] | Area<br>(%) |
|--------|------------------|----------------|-----------------|-----------------|-------------|
| 1      | 1.108            | 0.1151         | 13.26876        | 1.62815         | 0.1076      |
| 2      | 7.908            | 0.2271         | 1.23237e4       | 840.11731       | 99.8924     |
| Totals |                  |                | 1.23369e4       | 841.74546       |             |

*N*-(2,2-dimethyl-6-(pyridin-4-yl)-2,3-dihydrobenzofuran-5-yl)-2-(2-((2,2,2-trifluoroethyl)amino)pyridin-4-yl)oxazole-4-carboxamide (**3**)

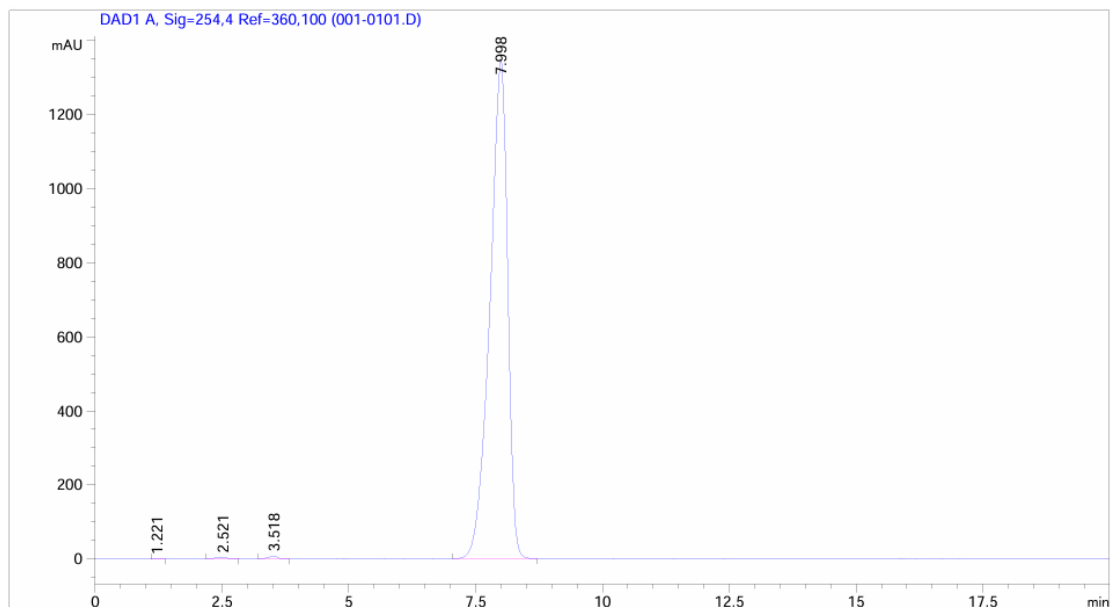

| Peak   | RetTime<br>[min] | Width<br>[min] | Area<br>[mAU*s] | Height<br>[mAU] | Area<br>(%) |
|--------|------------------|----------------|-----------------|-----------------|-------------|
| 1      | 1.221            | 0.0932         | 7.58720         | 1.14726         | 0.0231      |
| 2      | 2.521            | 0.1719         | 63.13881        | 5.04800         | 0.1923      |
| 3      | 3.518            | 0.1753         | 102.99205       | 8.75075         | 0.3138      |
| 4      | 7.998            | 0.3657         | 3.26521e4       | 1342.95386      | 99.4708     |
| Totals |                  |                | 3.28258e4       | 1357.89986      |             |

*N*-(2,2-dimethyl-6-(pyridin-4-yl)-2,3-dihydrobenzofuran-5-yl)-2-(1*H*-pyrazol-4-yl)oxazole-4-carboxamide (**4**)

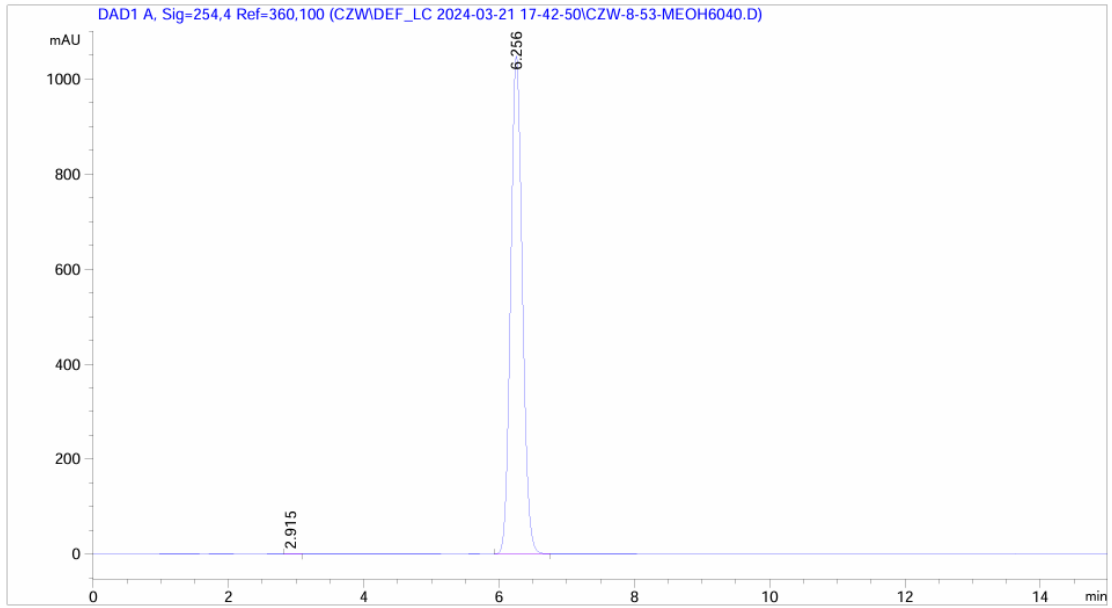

| Peak   | RetTime<br>[min] | Width<br>[min] | Area<br>[mAU*s] | Height<br>[mAU] | Area<br>(%) |
|--------|------------------|----------------|-----------------|-----------------|-------------|
| 1      | 2.915            | 0.0984         | 8.14081         | 1.24249         | 0.0645      |
| 2      | 6.256            | 0.1864         | 1.26173e4       | 1048.61072      | 99.9355     |
| Totals |                  |                | 1.26254e4       | 1049.85320      |             |

*N*-(2,2-dimethyl-6-(pyridin-4-yl)-2,3-dihydrobenzofuran-5-yl)-2-(3-sulfamoylphenyl)oxazole-4-carboxamide (**5**)

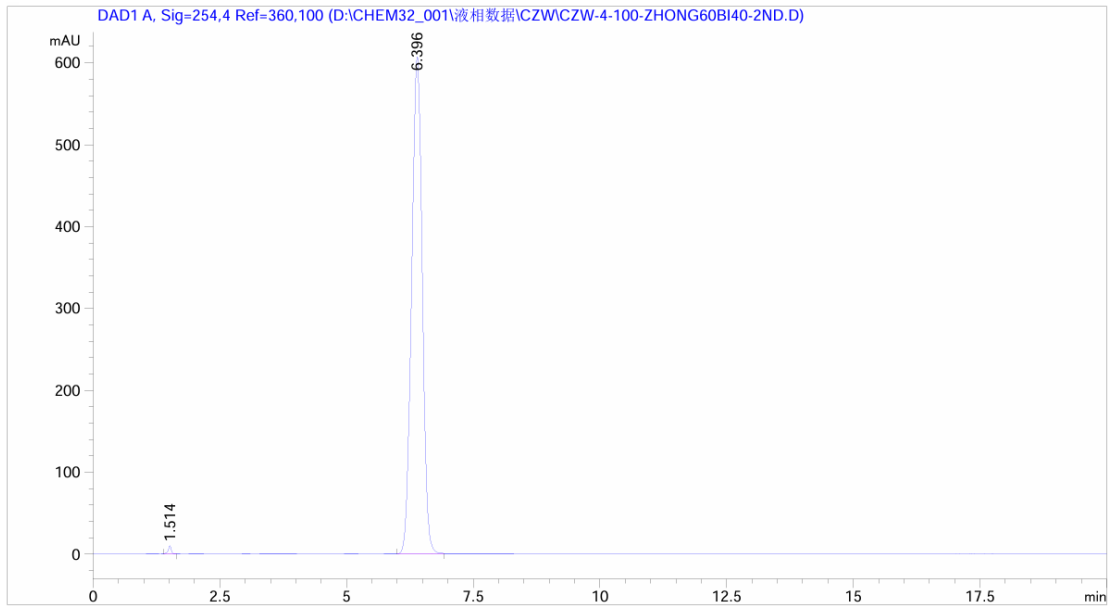

| Peak   | RetTime<br>[min] | Width<br>[min] | Area<br>[mAU*s] | Height<br>[mAU] | Area<br>(%) |
|--------|------------------|----------------|-----------------|-----------------|-------------|
| 1      | 1.514            | 0.0604         | 41.48970        | 9.99302         | 0.4674      |
| 2      | 6.396            | 0.2298         | 8834.61914      | 607.09369       | 99.5326     |
| Totals |                  |                | 8876.10884      | 617.08671       |             |

*N*-(2,2-dimethyl-6-(pyridin-4-yl)-2,3-dihydrobenzofuran-5-yl)-2-(6-oxo-1,6-dihydro-*pyridin-3-yl*)oxazole-4-carboxamide (**6**)

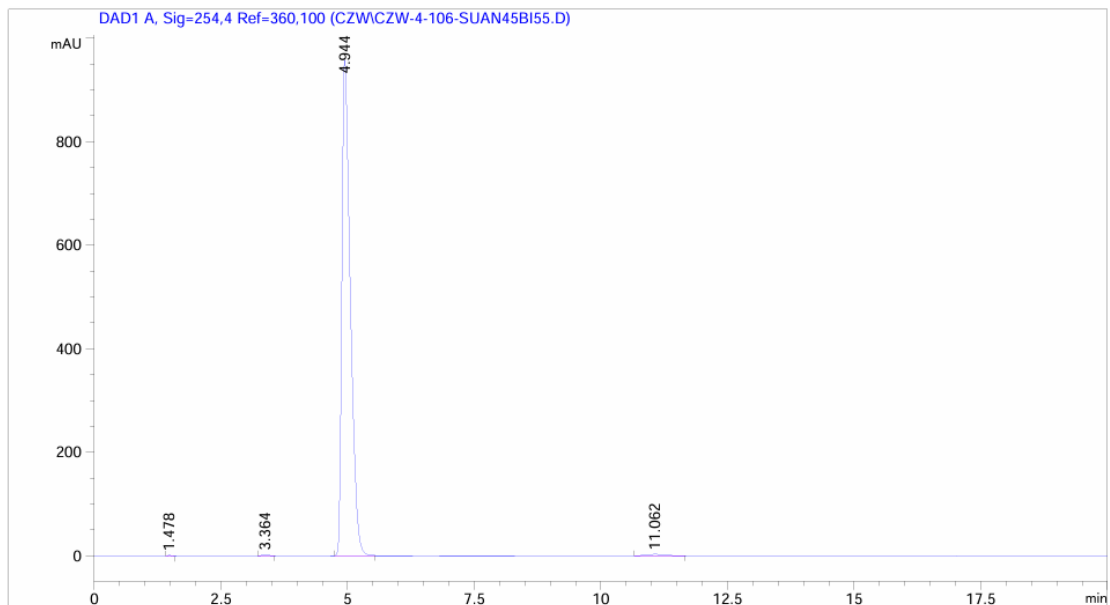

| Peak   | RetTime<br>[min] | Width<br>[min] | Area<br>[mAU*s] | Height<br>[mAU] | Area<br>(%) |
|--------|------------------|----------------|-----------------|-----------------|-------------|
| 1      | 1.478            | 0.0746         | 9.40688         | 1.80997         | 0.0840      |
| 2      | 3.364            | 0.1217         | 17.98340        | 2.23999         | 0.1606      |
| 3      | 4.944            | 0.1750         | 1.10951e4       | 958.68994       | 99.0999     |
| 4      | 11.062           | 0.3630         | 73.38122        | 3.06806         | 0.6554      |
| Totals |                  |                | 1.11959e4       | 965.80796       |             |

*N*-(2,2-dimethyl-6-(pyridin-4-yl)-2,3-dihydrobenzofuran-5-yl)-2-(1*H*-pyrrolo[2,3-*b*]pyridin-4-yl)oxazole-4-carboxamide (7)

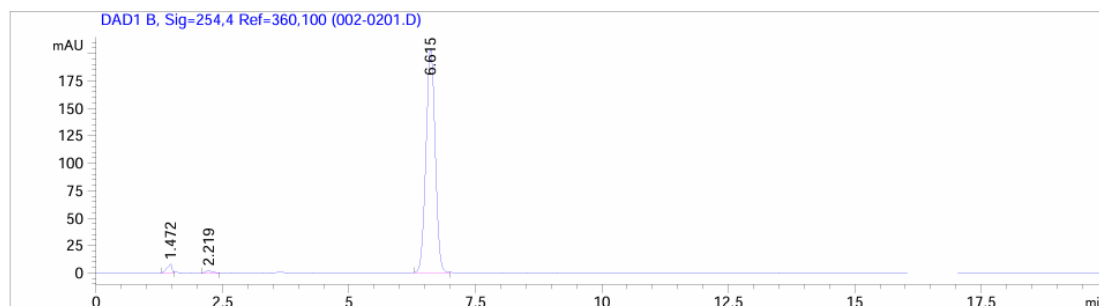

| Peak   | RetTime<br>[min] | Width<br>[min] | Area<br>[mAU*s] | Height<br>[mAU] | Area<br>(%) |
|--------|------------------|----------------|-----------------|-----------------|-------------|
| 1      | 1.472            | 0.0884         | 52.19584        | 7.97314         | 1.9652      |
| 2      | 2.219            | 0.1145         | 15.88582        | 2.09516         | 0.5981      |
| 3      | 6.615            | 0.1977         | 2587.93311      | 204.39383       | 97.4367     |
| Totals |                  |                | 2656.01476      | 214.46213       |             |

2-(2-aminopyridin-4-yl)-*N*-(3,3-difluoro-2,2-dimethyl-6-(pyridin-4-yl)-2,3-dihydrobenzofuran-5-yl)oxazole-4-carboxamide (**8**)

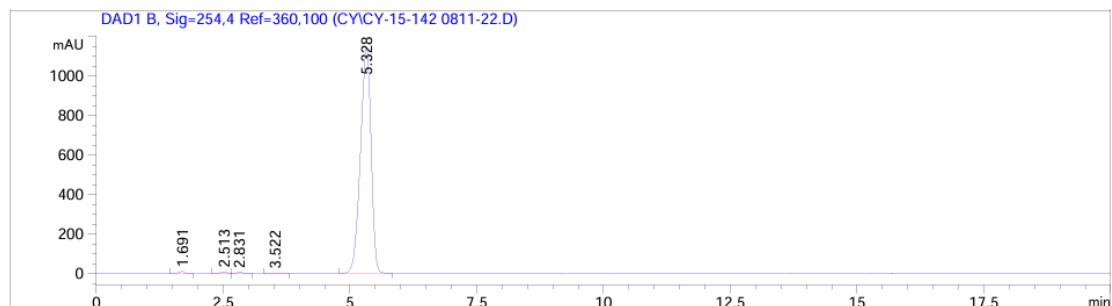

| Peak   | RetTime<br>[min] | Width<br>[min] | Area<br>[mAU*s] | Height<br>[mAU] | Area<br>(%) |
|--------|------------------|----------------|-----------------|-----------------|-------------|
| 1      | 1.691            | 0.0997         | 81.41309        | 11.34933        | 0.4816      |
| 2      | 2.513            | 0.1213         | 59.18854        | 7.24898         | 0.3501      |
| 3      | 2.831            | 0.1558         | 39.29405        | 3.76258         | 0.2324      |
| 4      | 3.522            | 0.1704         | 17.69357        | 1.58337         | 0.1047      |
| 5      | 5.328            | 0.2283         | 1.67078e4       | 1144.71619      | 98.8312     |
| Totals |                  |                | 1.69054e4       | 1168.66045      |             |

2-(2-aminopyridin-4-yl)-*N*-(6-(pyridin-4-yl)-3*H*-spiro[benzofuran-2,4'-piperidin]-5-yl  
 )oxazole-4-carboxamide (**9**)

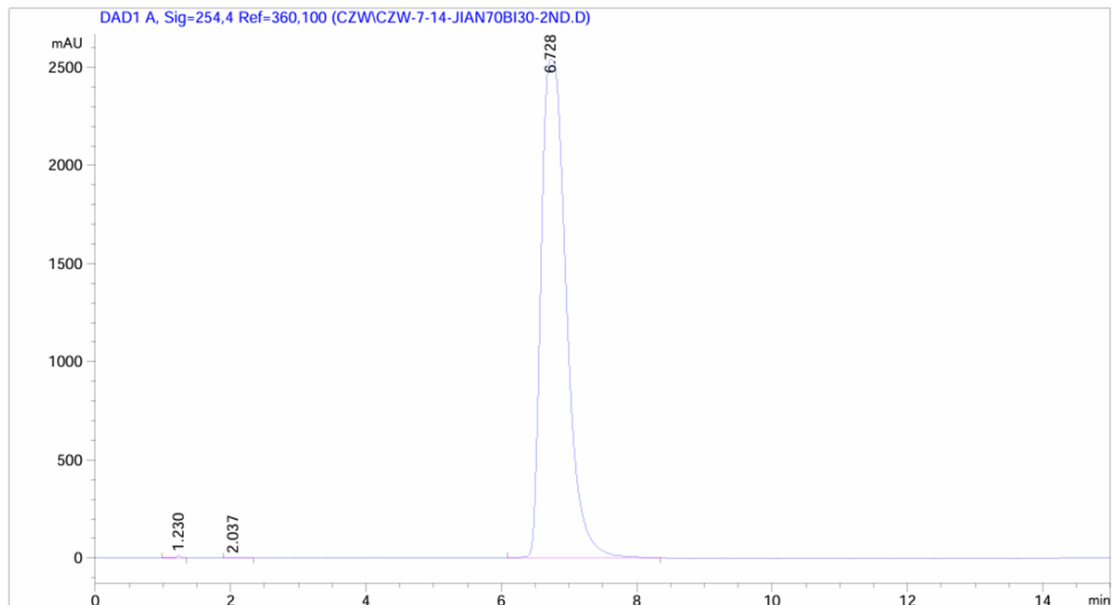

| Peak   | RetTime<br>[min] | Width<br>[min] | Area<br>[mAU*s] | Height<br>[mAU] | Area<br>(%) |
|--------|------------------|----------------|-----------------|-----------------|-------------|
| 1      | 1.230            | 0.0802         | 70.41953        | 12.41711        | 0.1081      |
| 2      | 2.037            | 0.1430         | 14.34328        | 1.27771         | 0.0220      |
| 3      | 6.728            | 0.3448         | 6.50335e4       | 2539.61816      | 99.8698     |
| Totals |                  |                | 6.51182e4       | 2553.31298      |             |

2-(2-aminopyridin-4-yl)-*N*-(1'-methyl-6-(pyridin-4-yl)-3*H*-spiro[benzofuran-2,4'-piperidin]-5-yl)oxazole-4-carboxamide (**10**)

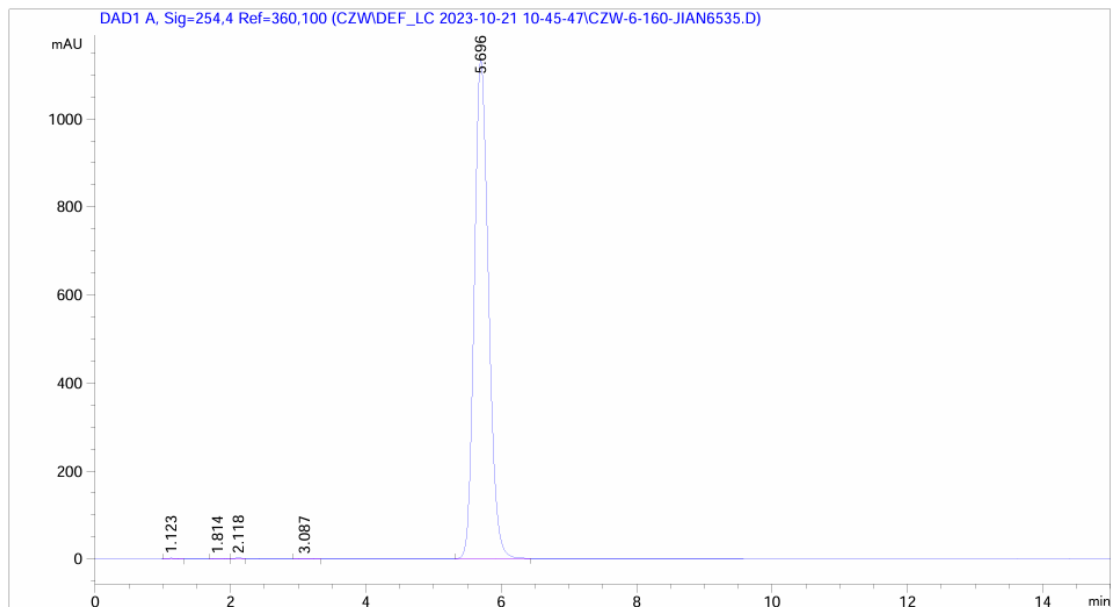

| Peak   | RetTime<br>[min] | Width<br>[min] | Area<br>[mAU*s] | Height<br>[mAU] | Area<br>(%) |
|--------|------------------|----------------|-----------------|-----------------|-------------|
| 1      | 1.123            | 0.0965         | 16.76173        | 2.37146         | 0.1009      |
| 2      | 1.814            | 0.1186         | 14.16868        | 1.74660         | 0.0853      |
| 3      | 2.118            | 0.1163         | 19.07369        | 2.46358         | 0.1148      |
| 4      | 3.087            | 0.1443         | 12.48115        | 1.34416         | 0.0751      |
| 5      | 5.696            | 0.2283         | 1.65484e4       | 1133.49500      | 99.6238     |
| Totals |                  |                | 1.66109e4       | 1141.42080      |             |

2-(2-aminopyridin-4-yl)-*N*-(1'-(2,2-difluoroethyl)-6-(pyridin-4-yl)-3*H*-spiro[benzofuran-2,4'-piperidin]-5-yl)oxazole-4-carboxamide (**11**)

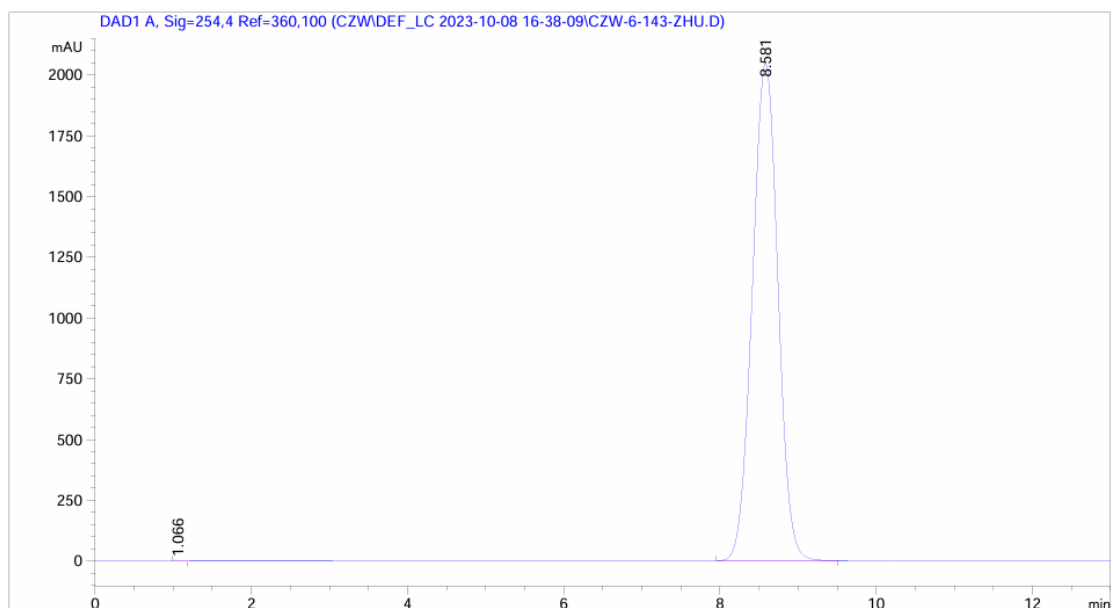

| Peak   | RetTime<br>[min] | Width<br>[min] | Area<br>[mAU*s] | Height<br>[mAU] | Area<br>(%) |
|--------|------------------|----------------|-----------------|-----------------|-------------|
| 1      | 1.066            | 0.0833         | 6.41048         | 1.11073         | 0.0138      |
| 2      | 8.581            | 0.3551         | 4.65435e4       | 2048.19360      | 99.9862     |
| Totals |                  |                | 4.65499e4       | 2049.30434      |             |

2-(2-aminopyridin-4-yl)-*N*-(6-(pyridin-4-yl)-1'-(2,2,2-trifluoroethyl)-3*H*-spiro[benzofuran-2,4'-piperidin]-5-yl)oxazole-4-carboxamide (**12**)

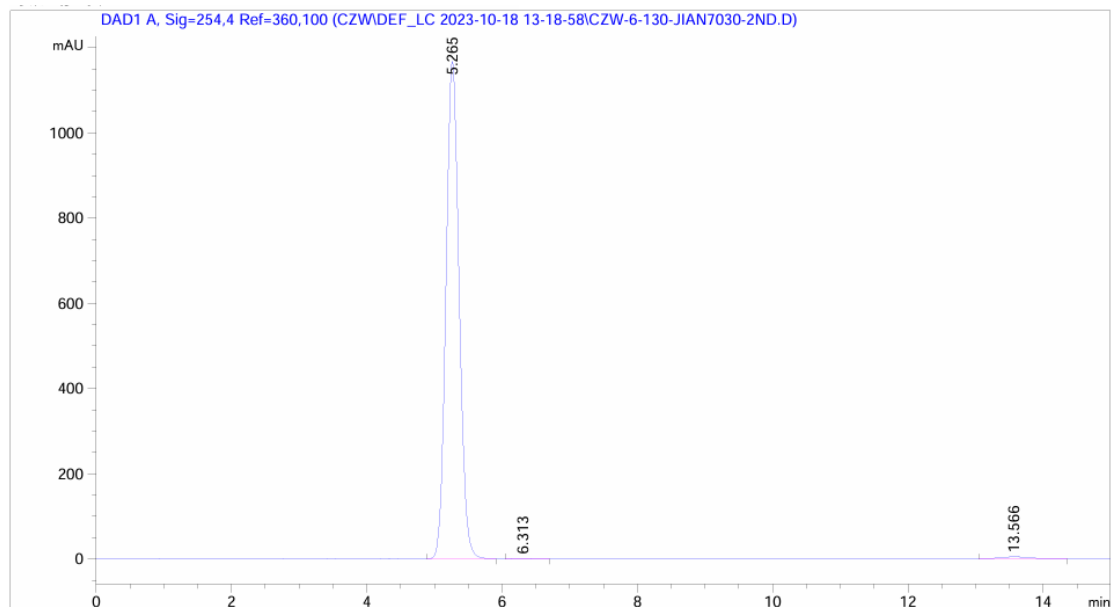

| Peak   | RetTime<br>[min] | Width<br>[min] | Area<br>[mAU*s] | Height<br>[mAU] | Area<br>(%) |
|--------|------------------|----------------|-----------------|-----------------|-------------|
| 1      | 5.265            | 0.2112         | 1.57364e4       | 1168.18188      | 98.9075     |
| 2      | 6.313            | 0.1899         | 17.08642        | 1.18724         | 0.1074      |
| 3      | 13.566           | 0.4617         | 156.73451       | 5.00018         | 0.9851      |
| Totals |                  |                | 1.59102e4       | 1174.36930      |             |

*N*-(1'-acetyl-6-(pyridin-4-yl)-3*H*-spiro[benzofuran-2,4'-piperidin]-5-yl)-2-(2-aminopyridin-4-yl)oxazole-4-carboxamide (**13**)

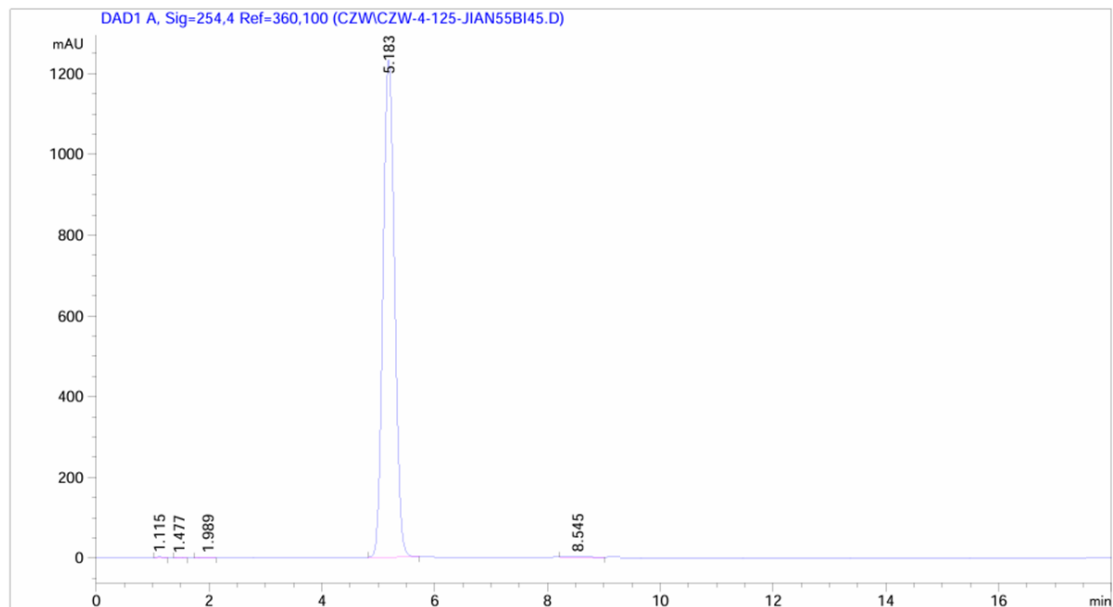

| Peak   | RetTime<br>[min] | Width<br>[min] | Area<br>[mAU*s] | Height<br>[mAU] | Area<br>(%) |
|--------|------------------|----------------|-----------------|-----------------|-------------|
| 1      | 1.115            | 0.0829         | 19.08170        | 3.32699         | 0.1085      |
| 2      | 1.477            | 0.1007         | 8.17601         | 1.18188         | 0.0465      |
| 3      | 1.989            | 0.1558         | 25.26881        | 2.17132         | 0.1437      |
| 4      | 5.183            | 0.2257         | 1.74927e4       | 1231.85681      | 99.4469     |
| 5      | 8.545            | 0.2768         | 44.75562        | 2.47680         | 0.2544      |
| Totals |                  |                | 1.75900e4       | 1241.01380      |             |

2-(2-aminopyridin-4-yl)-*N*-(1'-propionyl-6-(pyridin-4-yl)-3*H*-spiro[benzofuran-2,4'-pi  
peridin]-5-yl)oxazole-4-carboxamide (**14**)

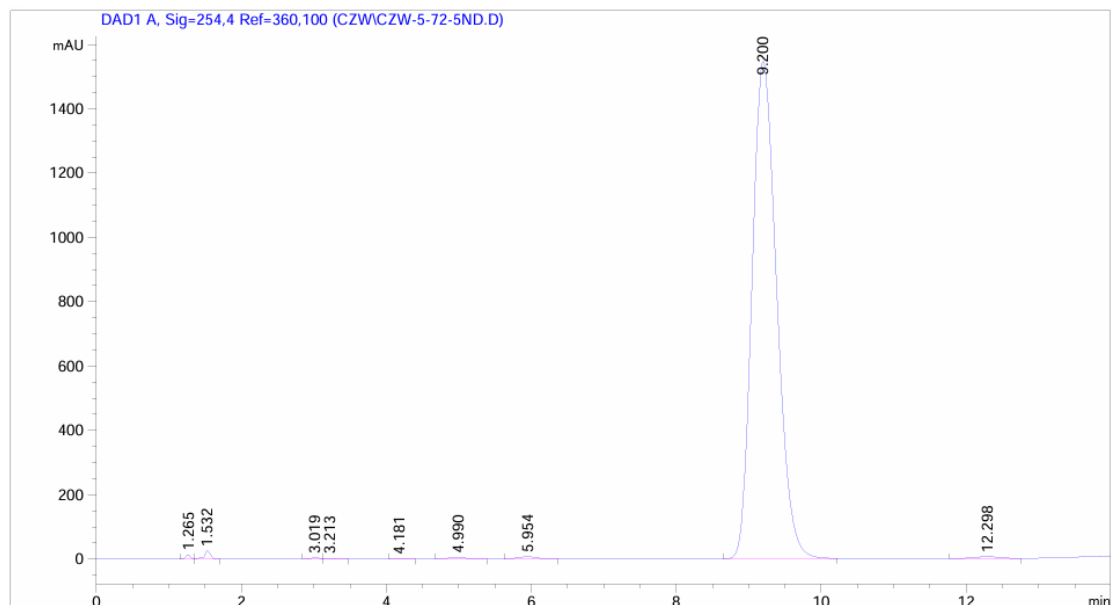

| Peak   | RetTime<br>[min] | Width<br>[min] | Area<br>[mAU*s] | Height<br>[mAU] | Area<br>(%) |
|--------|------------------|----------------|-----------------|-----------------|-------------|
| 1      | 1.265            | 0.0619         | 56.51296        | 13.77088        | 0.1530      |
| 2      | 1.532            | 0.0887         | 143.03836       | 25.79211        | 0.3872      |
| 3      | 3.019            | 0.1316         | 28.26218        | 3.31089         | 0.0765      |
| 4      | 3.213            | 0.1530         | 24.60363        | 2.41227         | 0.0666      |
| 5      | 4.181            | 0.1367         | 10.02356        | 1.11646         | 0.0271      |
| 6      | 4.990            | 0.2437         | 78.50866        | 4.93183         | 0.2125      |
| 7      | 5.954            | 0.2470         | 117.80408       | 7.27236         | 0.3189      |
| 8      | 9.200            | 0.3681         | 3.63336e4       | 1546.33813      | 98.3503     |
| 9      | 12.298           | 0.3952         | 150.71513       | 6.08032         | 0.4080      |
| Totals |                  |                | 3.69431e4       | 1611.02527      |             |

2-(2-aminopyridin-4-yl)-*N*-(1'-butyryl-6-(pyridin-4-yl)-3*H*-spiro[benzofuran-2,4'-piperidin]-5-yl)oxazole-4-carboxamide (**15**)

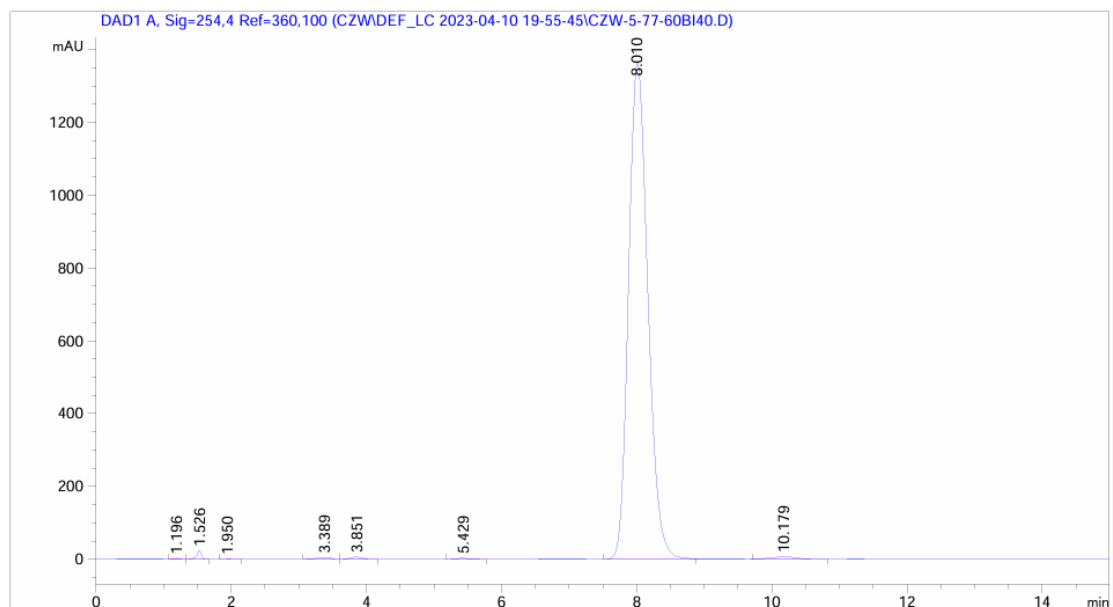

| Peak   | RetTime<br>[min] | Width<br>[min] | Area<br>[mAU*s] | Height<br>[mAU] | Area<br>(%) |
|--------|------------------|----------------|-----------------|-----------------|-------------|
| 1      | 1.196            | 0.0840         | 16.81593        | 2.72429         | 0.0614      |
| 2      | 1.526            | 0.0697         | 116.17903       | 24.33755        | 0.4241      |
| 3      | 1.950            | 0.1063         | 8.08699         | 1.17555         | 0.0295      |
| 4      | 3.389            | 0.2120         | 65.96297        | 4.75101         | 0.2408      |
| 5      | 3.851            | 0.1918         | 76.43655        | 6.20026         | 0.2790      |
| 6      | 5.429            | 0.2216         | 41.23497        | 2.83625         | 0.1505      |
| 7      | 8.010            | 0.3081         | 2.69159e4       | 1364.56506      | 98.2565     |
| 8      | 10.179           | 0.3671         | 152.88336       | 6.62701         | 0.5581      |
| Totals |                  |                | 2.73935e4       | 1413.21697      |             |

2-(2-aminopyridin-4-yl)-*N*-(1'-(2-hydroxyacetyl)-6-(pyridin-4-yl)-3*H*-spiro[benzofuran-2,4'-piperidin]-5-yl)oxazole-4-carboxamide (**16**)

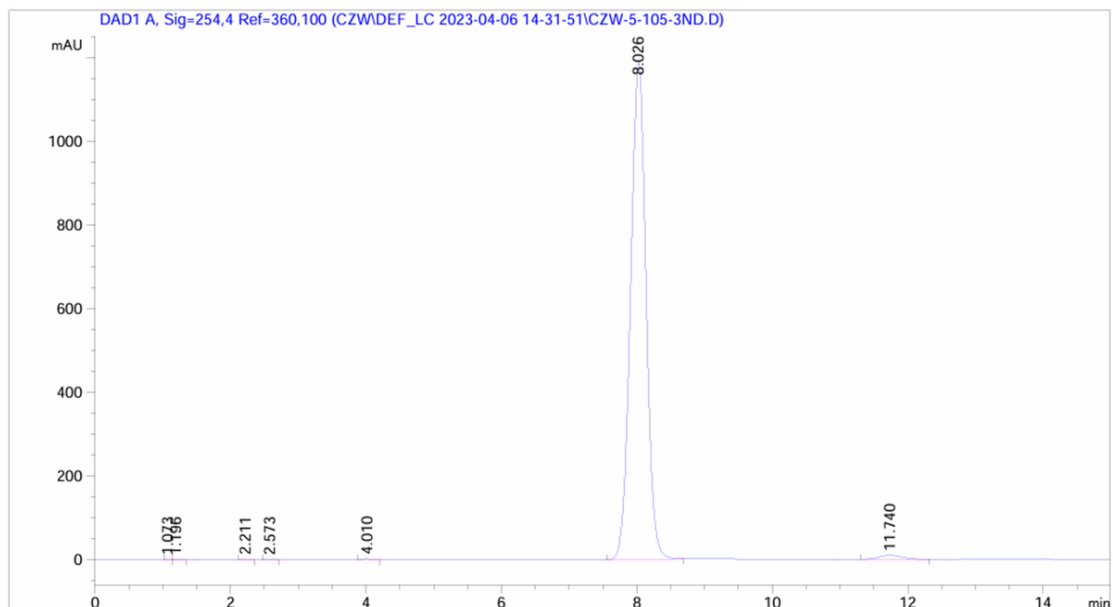

| Peak   | RetTime<br>[min] | Width<br>[min] | Area<br>[mAU*s] | Height<br>[mAU] | Area<br>(%) |
|--------|------------------|----------------|-----------------|-----------------|-------------|
| 1      | 1.073            | 0.0535         | 5.61536         | 1.57847         | 0.0294      |
| 2      | 1.196            | 0.0815         | 5.70393         | 1.08208         | 0.0299      |
| 3      | 2.211            | 0.0879         | 12.16927        | 2.15302         | 0.0637      |
| 4      | 2.573            | 0.0860         | 8.44843         | 1.54000         | 0.0442      |
| 5      | 4.010            | 0.1173         | 18.82439        | 2.45806         | 0.0985      |
| 6      | 8.026            | 0.2447         | 1.88252e4       | 1189.38318      | 98.5536     |
| 7      | 11.740           | 0.3487         | 225.52705       | 10.01483        | 1.1807      |
| Totals |                  |                | 1.91015e4       | 1208.20963      |             |

2-(2-aminopyridin-4-yl)-*N*-(6-(pyridin-4-yl)-1'-(thiazol-2-yl)-3*H*-spiro[benzofuran-2, 4'-piperidin]-5-yl)oxazole-4-carboxamide (**17**)

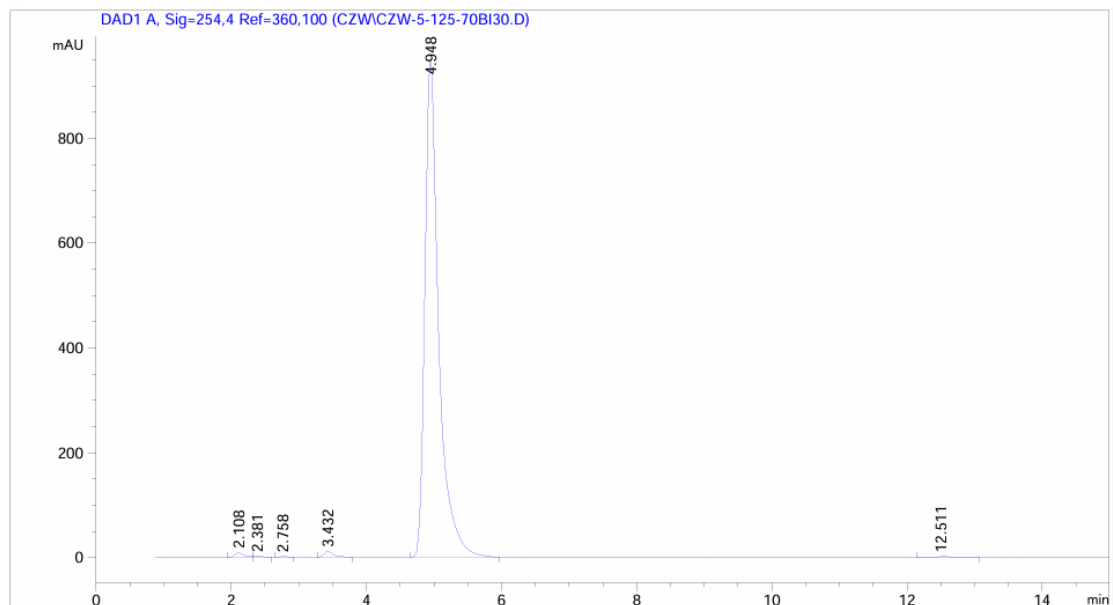

| Peak   | RetTime<br>[min] | Width<br>[min] | Area<br>[mAU*s] | Height<br>[mAU] | Area<br>(%) |
|--------|------------------|----------------|-----------------|-----------------|-------------|
| 1      | 2.108            | 0.1265         | 77.64240        | 8.83603         | 0.5652      |
| 2      | 2.381            | 0.1321         | 15.35501        | 1.68871         | 0.1118      |
| 3      | 2.758            | 0.1401         | 11.28359        | 1.13393         | 0.0821      |
| 4      | 3.432            | 0.1508         | 112.85766       | 11.07893        | 0.8216      |
| 5      | 4.948            | 0.2099         | 1.34658e4       | 946.73804       | 98.0334     |
| 6      | 12.511           | 0.3890         | 52.99458        | 1.92628         | 0.3858      |
| Totals |                  |                | 1.37359e4       | 971.40192       |             |

*N*-(1'-acetyl-6-(furan-3-yl)-3*H*-spiro[benzofuran-2,4'-piperidin]-5-yl)-2-(2-aminopyridin-4-yl)oxazole-4-carboxamide (**18**)

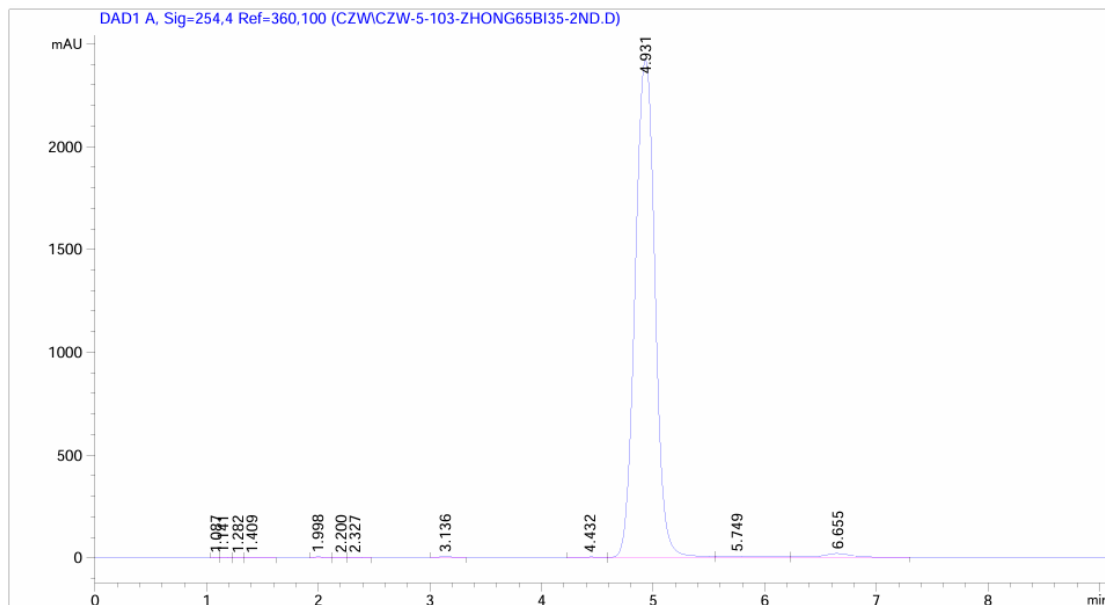

| Peak   | RetTime<br>[min] | Width<br>[min] | Area<br>[mAU*s] | Height<br>[mAU] | Area<br>(%) |
|--------|------------------|----------------|-----------------|-----------------|-------------|
| 1      | 1.087            | 0.0463         | 8.14004         | 2.76644         | 0.0267      |
| 2      | 1.141            | 0.0649         | 11.46271        | 2.52637         | 0.0377      |
| 3      | 1.282            | 0.0771         | 6.14279         | 1.17223         | 0.0202      |
| 4      | 1.409            | 0.1141         | 13.21709        | 1.60518         | 0.0434      |
| 5      | 1.998            | 0.0699         | 22.95955        | 4.97308         | 0.0754      |
| 6      | 2.200            | 0.0782         | 8.35802         | 1.62094         | 0.0275      |
| 7      | 2.327            | 0.0797         | 8.80534         | 1.78104         | 0.0289      |
| 8      | 3.136            | 0.1153         | 34.97212        | 4.67145         | 0.1149      |
| 9      | 4.432            | 0.1715         | 33.61323        | 3.12354         | 0.1104      |
| 10     | 4.931            | 0.1938         | 2.98149e4       | 2418.17798      | 97.9521     |
| 11     | 5.749            | 0.3377         | 163.89183       | 6.83499         | 0.5384      |
| 12     | 6.655            | 0.2492         | 311.78482       | 18.63343        | 1.0243      |
| Totals |                  |                | 3.04382e4       | 2467.88668      |             |

*N*-(1'-acetyl-6-(thiophen-3-yl)-3*H*-spiro[benzofuran-2,4'-piperidin]-5-yl)-2-(2-aminopyridin-4-yl)oxazole-4-carboxamide (**19**)

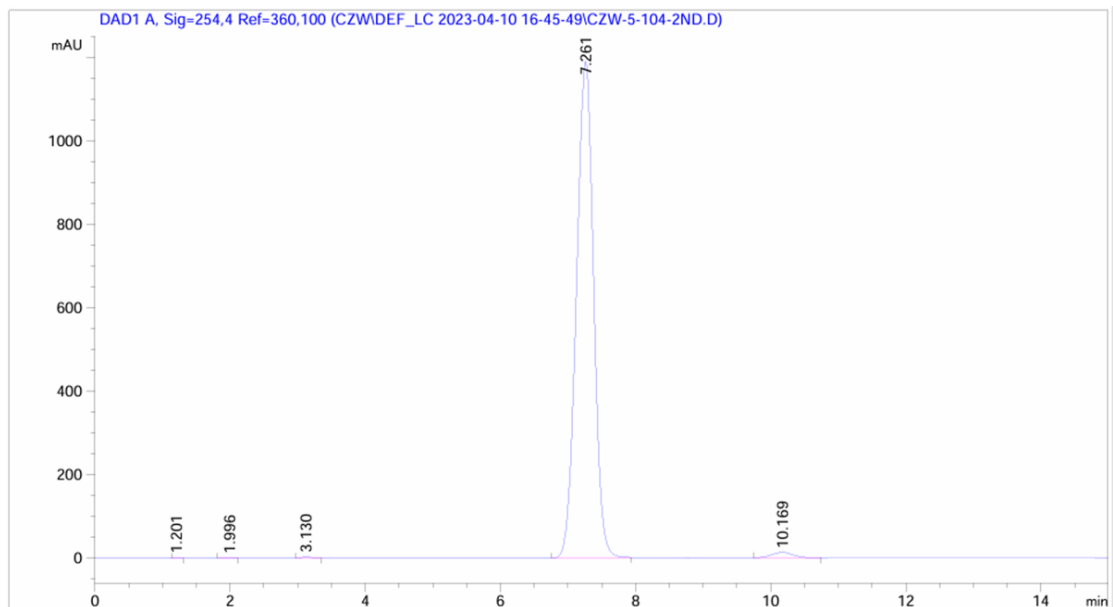

| Peak   | RetTime<br>[min] | Width<br>[min] | Area<br>[mAU*s] | Height<br>[mAU] | Area<br>(%) |
|--------|------------------|----------------|-----------------|-----------------|-------------|
| 1      | 1.201            | 0.0559         | 6.97191         | 1.94214         | 0.0328      |
| 2      | 1.996            | 0.0976         | 9.33197         | 1.36804         | 0.0439      |
| 3      | 3.130            | 0.1311         | 30.51139        | 3.59173         | 0.1435      |
| 4      | 7.261            | 0.2749         | 2.09334e4       | 1191.70605      | 98.4292     |
| 5      | 10.169           | 0.3385         | 287.25403       | 13.27145        | 1.3507      |
| Totals |                  |                | 2.12675e4       | 1211.87941      |             |

*N*-(1'-acetyl-6-(1-methyl-1*H*-pyrazol-4-yl)-3*H*-spiro[benzofuran-2,4'-piperidin]-5-yl)-2-(2-aminopyridin-4-yl)oxazole-4-carboxamide (**20**)

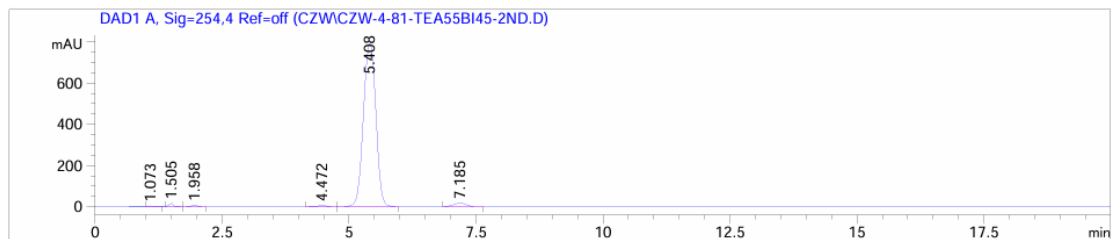

| Peak   | RetTime<br>[min] | Width<br>[min] | Area<br>[mAU*s] | Height<br>[mAU] | Area<br>(%) |
|--------|------------------|----------------|-----------------|-----------------|-------------|
| 1      | 1.073            | 0.1282         | 24.95506        | 2.69131         | 0.1780      |
| 2      | 1.505            | 0.0754         | 86.36100        | 15.90092        | 0.6159      |
| 3      | 1.958            | 0.1273         | 60.31545        | 7.23472         | 0.4301      |
| 4      | 4.472            | 0.2371         | 70.09052        | 4.66942         | 0.4998      |
| 5      | 5.408            | 0.2748         | 1.34888e4       | 791.42328       | 96.1917     |
| 6      | 7.185            | 0.2651         | 292.30481       | 17.30049        | 2.0845      |
| Totals |                  |                | 1.40229e4       | 839.22014       |             |

*N*-(1'-acetyl-6-(4-fluorophenyl)-3*H*-spiro[benzofuran-2,4'-piperidin]-5-yl)-2-(2-amino pyridin-4-yl)oxazole-4-carboxamide (**21**)

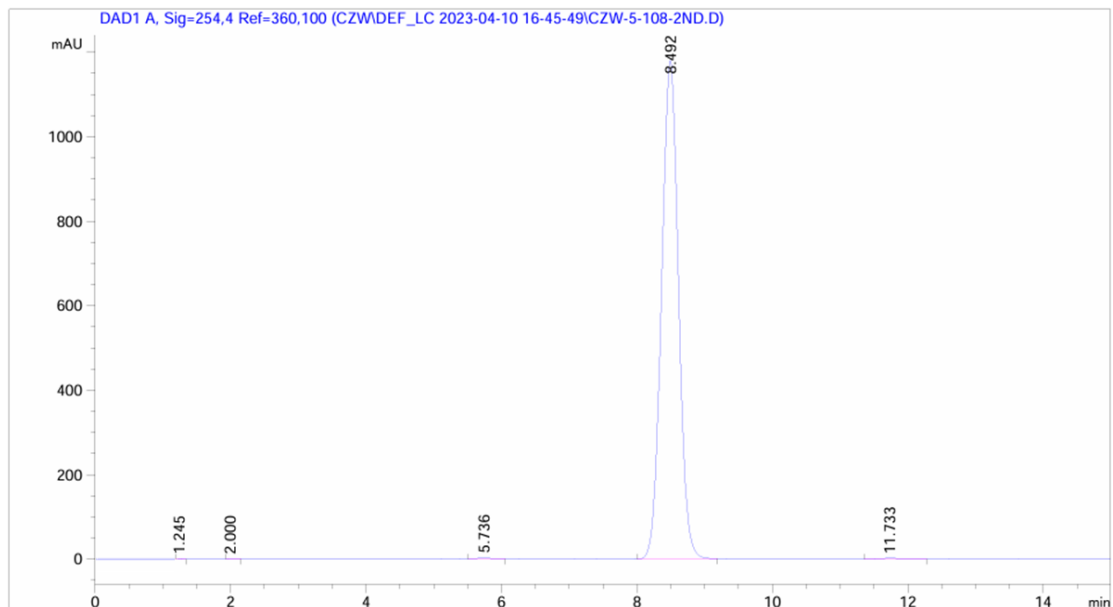

| Peak   | RetTime<br>[min] | Width<br>[min] | Area<br>[mAU*s] | Height<br>[mAU] | Area<br>(%) |
|--------|------------------|----------------|-----------------|-----------------|-------------|
| 1      | 1.245            | 0.0489         | 5.74512         | 1.81639         | 0.0279      |
| 2      | 2.000            | 0.0682         | 7.57378         | 1.76124         | 0.0368      |
| 3      | 5.736            | 0.1884         | 50.41125        | 4.18854         | 0.2452      |
| 4      | 8.492            | 0.2679         | 2.04395e4       | 1181.17432      | 99.4328     |
| 5      | 11.733           | 0.3315         | 52.86382        | 2.47196         | 0.2572      |
| Totals |                  |                | 2.05561e4       | 1191.41245      |             |

2-(2-aminopyridin-4-yl)-*N*-(2,2-dimethyl-6-(pyridin-4-yl)-2,3-dihydrobenzofuran-5-yl)oxazole-4-carboxamide (DW18134)

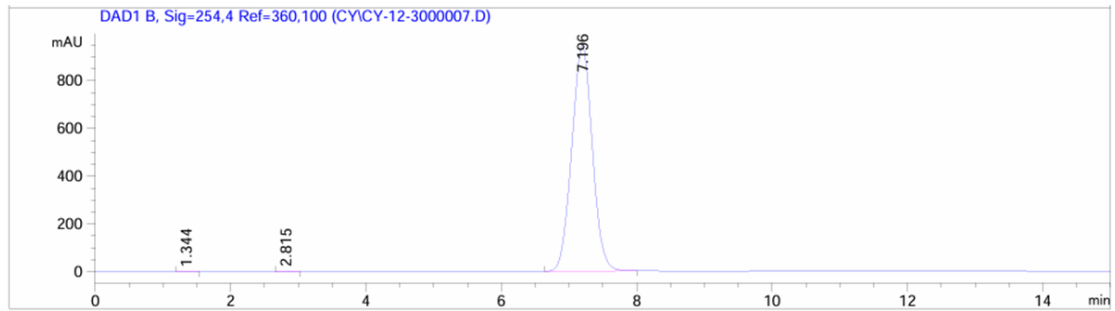

| Peak   | RetTime<br>[min] | Width<br>[min] | Area<br>[mAU*s] | Height<br>[mAU] | Area<br>(%) |
|--------|------------------|----------------|-----------------|-----------------|-------------|
| 1      | 1.344            | 0.0987         | 10.79273        | 1.48710         | 0.0539      |
| 2      | 2.815            | 0.1256         | 15.24155        | 1.75072         | 0.0762      |
| 3      | 7.196            | 0.3258         | 1.99813e4       | 948.24341       | 99.8699     |
| Totals |                  |                | 2.00073e4       | 951.48123       |             |

### The binding models of compounds 3–7 with IRAK4.

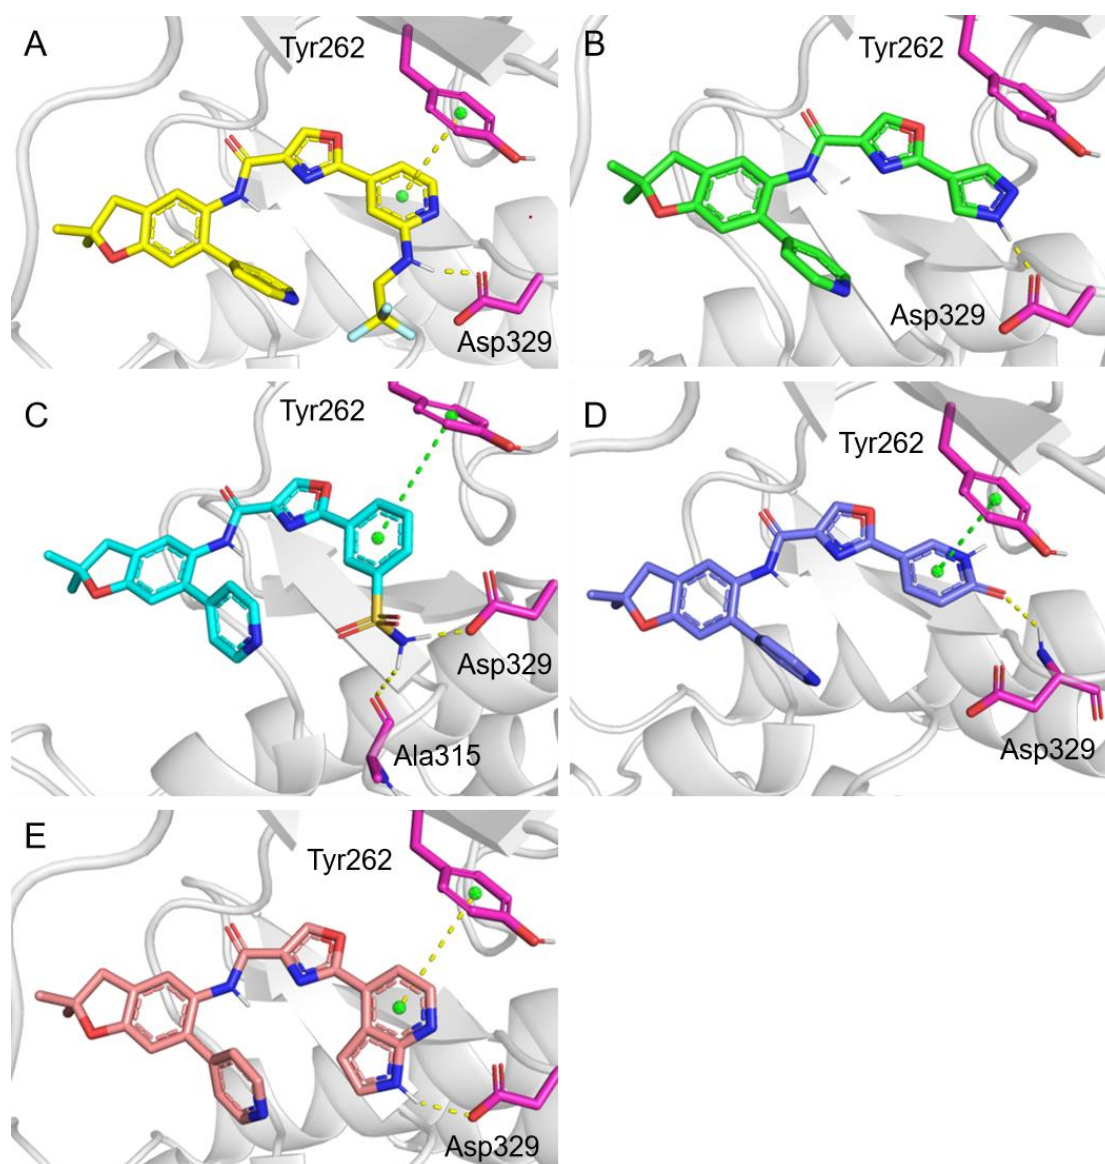

**Fig S1.** The binding models of compounds 3–7 with IRAK4. (A) the binding model of 3 with IRAK4; (B) the binding model of 4 with IRAK4; (C) the binding model of 5 with IRAK4; (D) the binding model of 6 with IRAK4; (E) the binding model of 7 with IRAK4.

### References

1. Y. Chen, Y. Ning, Z. Chen, Y. Xue, Q. Wu, W. Duan, J. Ding, J. Zhou, H. Xie and H. Zhang, *Eur. J. Med. Chem.*, 2023, **256**, 115453.
